# Supplementary material for: A Comprehensive Survey of Genomic Alterations in Gastric Cancer Reveals Recurrent Neoantigens as Potential Therapeutic Targets
Source: Hindawi journal article supplement (doi:10.1155/2019/2183510), 2019-11-05
Supplement: f1 [file 2183510.f1.zip]

Altered in 842 (90.15%) of 934 samples.

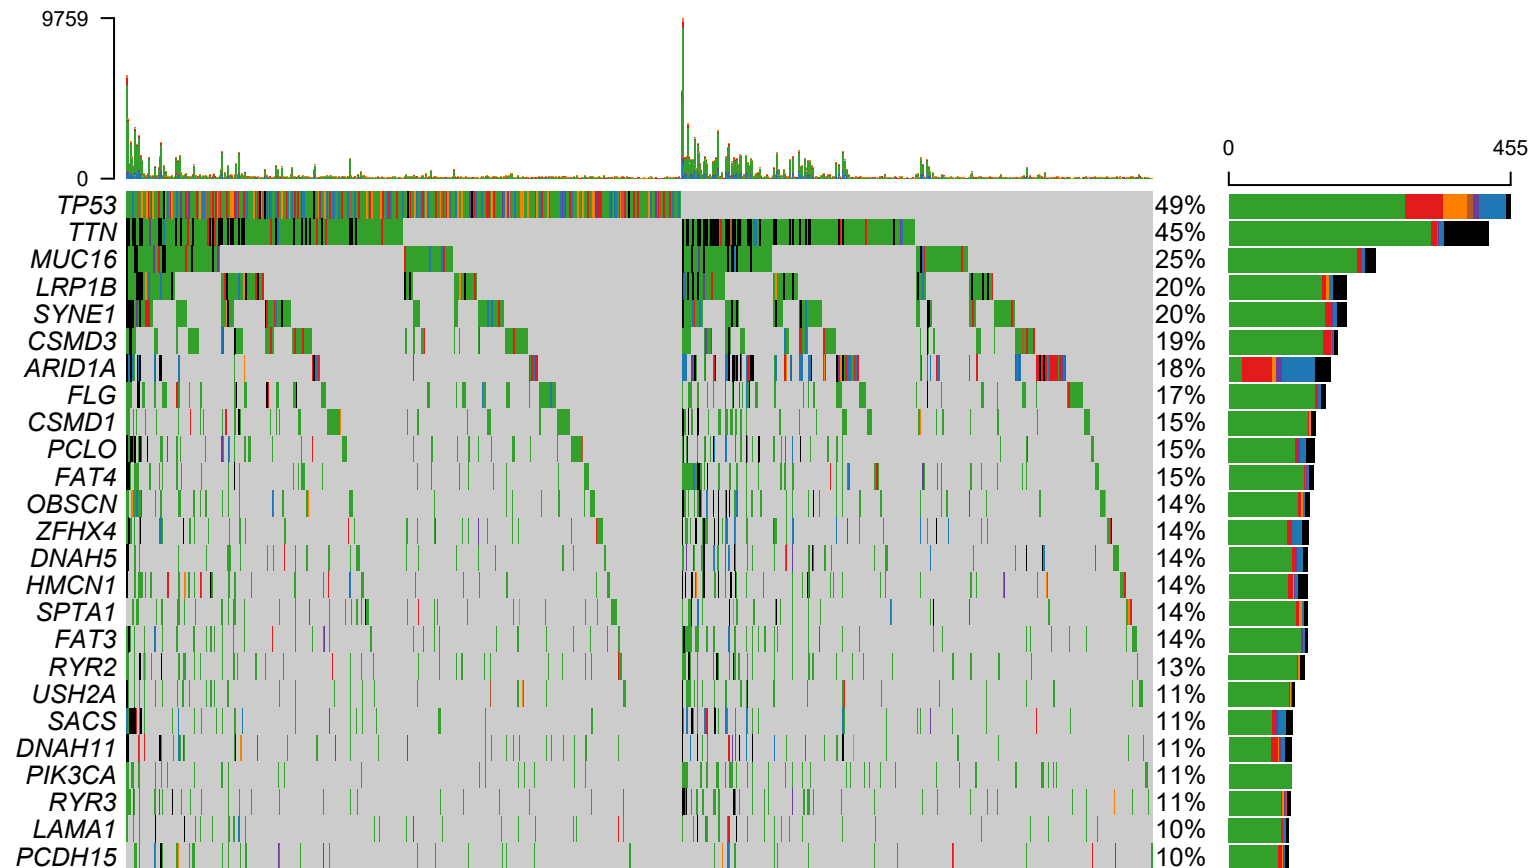

- Missense\_Mutation
- Nonsense\_Mutation
- Splice\_Site
- In\_Frame\_Del
- Frame\_Shift\_Ins
- Frame\_Shift\_Del
- In\_Frame\_Ins
- Multi\_Hit
