# Supplementary material for: A Comprehensive Survey of Genomic Alterations in Gastric Cancer Reveals Recurrent Neoantigens as Potential Therapeutic Targets
Source: Biomed Res Int. 2019 Nov 5;2019:2183510. doi: 10.1155/2019/2183510 (PMC6874998; doi:10.1155/2019/2183510)
Supplement: Supplementary Materials — Supplementary Figure S1: mutational landscape of the 942 GC (gastric cancer) samples. Supplementary Figure S2: somatic mutation interactions between genes. Supplementary Table S1: six published GC genomic literature involving 942 GC samples in this study. Supplementary Table S2: clinical information of 942 GC samples. Supplementary Table S3: mutation sites, frequencies, and HLA I alleles of all predicted neoantigens. [file 2183510.f1.zip › 2183510.f1/Supplementary Table S1.xlsx]

## Sheet: Sheet1
Published publications	Cohort
Chen K, Yang D, Li X, et al: Mutational landscape of gastric adenocarcinoma in Chinese : Implications for prognosis and therapy. Proc Natl Acad Sci 6:1–6, 2015	Tianjin
Cancer T, Atlas G: Comprehensive molecular characterization of gastric adenocarcinoma. Nature , 2014	TCGA
Wang K, Yuen ST, Xu J, et al: Whole-genome sequencing and comprehensive molecular profiling identify new driver mutations in gastric cancer. Nat Genet 46:573–82, 2014	HongKong
Wong SS, Kim K-M, Ting JC, et al: Genomic landscape and genetic heterogeneity in gastric adenocarcinoma revealed by whole-genome sequencing. Nat Commun 5:5477, 2014	S.Korean
Kakiuchi M, Nishizawa T, Ueda H, et al: Recurrent gain-of-function mutations of RHOA in diffuse-type gastric carcinoma. Nat Genet 46:583–7, 2014	Japan
Xing R, Zhou Y, Yu J, Yu Y, Nie Y, Luo W, Yang C, Xiong T, Wu WKK, Li Z et al: Whole-genome sequencing reveals novel tandem-duplication hotspots and a prognostic mutational signature in gastric cancer. Nature communications 2019, 10(1):2037.	Beijing
