# Supplementary material for: A Comprehensive Survey of Genomic Alterations in Gastric Cancer Reveals Recurrent Neoantigens as Potential Therapeutic Targets
Source: Biomed Res Int. 2019 Nov 5;2019:2183510. doi: 10.1155/2019/2183510 (PMC6874998; doi:10.1155/2019/2183510)
Supplement: Supplementary Materials — Supplementary Figure S1: mutational landscape of the 942 GC (gastric cancer) samples. Supplementary Figure S2: somatic mutation interactions between genes. Supplementary Table S1: six published GC genomic literature involving 942 GC samples in this study. Supplementary Table S2: clinical information of 942 GC samples. Supplementary Table S3: mutation sites, frequencies, and HLA I alleles of all predicted neoantigens. [file 2183510.f1.zip › 2183510.f1/Supplementary Table S2.xlsx]

## Sheet: FuJian
Tumor_Sample_Barcode	Sex	Age	Lauren	Stage	Differentiation	Location	EBV_status	H_pylori_status	MSI_status	Race	histological_grade	OS	OS.time	PFI	PFI.time	Study	Documented recurrence	APC	KRAS	TP53	SMAD4	PTPRT	LRP1B	ATM	BRAF	PIK3CA	PIK3R1	TCF7L2	chemotherapy
NO418419	M	47	NA	III	Poor	Body	NA	NA	NA	ASIAN	NA	NA	NA	1	17	FuJian	Peritoneal Metastasis	NA	NA	NA	NA	NA	NA	NA	NA	NA	NA	NA	0
NO428515	M	62	intestinal	IV	Well	Antrum	NA	NA	NA	ASIAN	NA	NA	NA	1	0.25	FuJian	Not	NA	NA	nonframeshift_deletion	NA	Missense_Mutation	NA	NA	NA	NA	NA	NA	1
NO456290	F	50	intestinal	III	Poor	Body	NA	NA	NA	ASIAN	NA	NA	NA	1	13	FuJian	Peritoneal Metastasis	NA	NA	NA	NA	NA	NA	NA	NA	NA	NA	NA	0
NO458208	F	40	NA	II	Poor	Body	NA	NA	NA	ASIAN	NA	NA	NA	1	10.75	FuJian	Peritoneal Metastasis	NA	NA	NA	NA	NA	NA	NA	NA	NA	NA	NA	0
NO463529	M	70	diffuse	III	Poor	Body	NA	NA	NA	ASIAN	NA	NA	NA	1	3	FuJian	Peritoneal Metastasis	NA	NA	NA	NA	Splice_Site	NA	NA	NA	NA	NA	NA	1
NO464726	M	60	diffuse	IV	Poor	Body	NA	NA	NA	ASIAN	NA	NA	NA	1	3.75	FuJian	Peritoneal Metastasis	NA	NA	Nonsense_Mutation	NA	NA	NA	NA	NA	NA	NA	NA	1
NO470000	M	63	intestinal	III	Poor	Body	NA	NA	NA	ASIAN	NA	NA	NA	1	7	FuJian	Not	NA	NA	Missense_Mutation	NA	NA	NA	NA	NA	NA	NA	NA	0
NO481115	M	62	intestinal	III	Poor	Body	NA	NA	NA	ASIAN	NA	NA	NA	1	16	FuJian	Peritoneal Metastasis	NA	NA	Missense_Mutation	NA	NA	NA	NA	NA	NA	NA	NA	1
NO492120	F	68	diffuse	IV	NA	Cardia	NA	NA	NA	ASIAN	NA	NA	NA	1	3	FuJian	Not	NA	NA	Missense_Mutation	NA	NA	Missense_Mutation	NA	NA	NA	NA	NA	1
NO497220	F	67	intestinal	II	Poor	Cardia	NA	NA	NA	ASIAN	NA	NA	NA	1	25	FuJian	Not	Frame_Shift_Ins	NA	Nonsense_Mutation	Frame_Shift_Ins	NA	NA	NA	NA	NA	NA	NA	1
NO509159	F	76	diffuse	IV	Well	Cardia	NA	NA	NA	ASIAN	NA	NA	NA	1	4.8	FuJian	Not	NA	NA	NA	NA	NA	NA	NA	NA	NA	NA	NA	1
NO515821	M	59	mixed	IV	Poor	Cardia	NA	NA	NA	ASIAN	NA	NA	NA	1	5	FuJian	Not	Frame_Shift_Del	NA	Missense_Mutation	NA	NA	NA	NA	NA	NA	NA	NA	1
NO541553	M	63	mixed	III	Poor	Cardia	NA	NA	NA	ASIAN	NA	NA	NA	0	36	FuJian	Not	NA	NA	Missense_Mutation	NA	Missense_Mutation;Missense_Mutation;Missense_Mutation	NA	NA	NA	NA	NA	NA	1
NO546676	M	55	diffuse	III	Poor	Body	NA	NA	NA	ASIAN	NA	NA	NA	1	22	FuJian	Not	NA	NA	Splice_Site	NA	NA	NA	NA	NA	NA	NA	NA	1
NO548893	F	66	intestinal	III	Poor	Body	NA	NA	NA	ASIAN	NA	NA	NA	1	7	FuJian	Not	NA	NA	NA	NA	NA	NA	NA	NA	NA	NA	NA	1
NO561062	M	63	intestinal	II	Well	Antrum	NA	NA	NA	ASIAN	NA	NA	NA	0	72	FuJian	Not	NA	NA	Missense_Mutation	NA	NA	NA	NA	NA	NA	NA	NA	1
NO561154	F	57	diffuse	III	Poor	Body	NA	NA	NA	ASIAN	NA	NA	NA	1	4	FuJian	Not	NA	NA	NA	NA	NA	NA	NA	NA	NA	NA	NA	1
NO563659	M	64	intestinal	IV	Poor	Cardia	NA	NA	NA	ASIAN	NA	NA	NA	1	7.5	FuJian	Not	NA	NA	NA	NA	Missense_Mutation	NA	NA	NA	NA	NA	NA	1
NO573713	M	68	intestinal	II	Poor	Antrum	NA	NA	NA	ASIAN	NA	NA	NA	1	5	FuJian	Peritoneal Metastasis	NA	NA	NA	NA	NA	NA	NA	NA	NA	Missense_Mutation	NA	1
NO581835	M	65	diffuse	III	Well	Body	NA	NA	NA	ASIAN	NA	NA	NA	1	59	FuJian	Not	NA	NA	Missense_Mutation;Missense_Mutation	NA	NA	Missense_Mutation	NA	NA	NA	NA	NA	1
NO582868	F	34	diffuse	III	Poor	Antrum	NA	NA	NA	ASIAN	NA	NA	NA	1	16	FuJian	Not	NA	NA	NA	NA	NA	NA	NA	NA	NA	NA	NA	1
NO583692	M	55	intestinal	II	Poor	Cardia	NA	NA	NA	ASIAN	NA	NA	NA	0	66	FuJian	Not	NA	NA	NA	NA	NA	NA	NA	NA	NA	NA	NA	1
NO587210	M	78	diffuse	III	NA	Cardia	NA	NA	NA	ASIAN	NA	NA	NA	0	65	FuJian	Not	NA	NA	Missense_Mutation	NA	NA	NA	NA	NA	NA	NA	NA	0
NO587411	M	73	intestinal	III	Well	Cardia	NA	NA	NA	ASIAN	NA	NA	NA	0	50	FuJian	Not	NA	NA	NA	NA	NA	NA	NA	NA	NA	NA	NA	0
NO588686	M	70	mixed	I	Poor	Body	NA	NA	NA	ASIAN	NA	NA	NA	0	66	FuJian	Not	NA	NA	Missense_Mutation	NA	NA	NA	NA	NA	NA	NA	NA	0
NO591240	F	57	diffuse	IV	Poor	Body	NA	NA	NA	ASIAN	NA	NA	NA	1	14.5	FuJian	Peritoneal Metastasis	NA	NA	NA	NA	NA	NA	NA	NA	NA	NA	NA	1
NO592779	M	67	intestinal	III	Well	Body	NA	NA	NA	ASIAN	NA	NA	NA	0	27	FuJian	Not	NA	NA	Splice_Site	NA	NA	NA	NA	NA	NA	NA	NA	1
NO593948	M	54	intestinal	III	Poor	Cardia	NA	NA	NA	ASIAN	NA	NA	NA	1	8	FuJian	Not	NA	NA	Missense_Mutation	NA	NA	NA	NA	NA	NA	NA	NA	1
NO593984	M	71	intestinal	III	Well	Cardia	NA	NA	NA	ASIAN	NA	NA	NA	1	11	FuJian	Not	NA	NA	NA	NA	NA	NA	NA	NA	NA	NA	NA	1
NO596748	M	58	mixed	III	Well	Cardia	NA	NA	NA	ASIAN	NA	NA	NA	1	10	FuJian	Not	NA	NA	Nonsense_Mutation	NA	NA	NA	NA	NA	NA	NA	NA	1
NO597153	M	53	NA	III	Poor	Body	NA	NA	NA	ASIAN	NA	NA	NA	1	6.25	FuJian	Not	NA	NA	NA	NA	NA	NA	NA	NA	NA	NA	NA	1
NO599280	M	59	intestinal	I	Well	Body	NA	NA	NA	ASIAN	NA	NA	NA	0	64	FuJian	Not	NA	NA	NA	NA	NA	NA	NA	NA	NA	NA	NA	1
NO602193	M	73	diffuse	III	Poor	Antrum	NA	NA	NA	ASIAN	NA	NA	NA	1	8	FuJian	Peritoneal Metastasis	NA	NA	Missense_Mutation	NA	NA	Missense_Mutation	NA	NA	NA	NA	NA	1
NO616227	M	73	mixed	III	Poor	Body	NA	NA	NA	ASIAN	NA	NA	NA	1	10	FuJian	Peritoneal Metastasis	NA	NA	Missense_Mutation	NA	NA	NA	NA	NA	NA	NA	NA	1
NO660447	F	61	diffuse	I	Poor	Body	NA	NA	NA	ASIAN	NA	NA	NA	0	60	FuJian	Not	NA	NA	NA	NA	NA	NA	NA	NA	NA	NA	NA	1
NO660970	M	71	diffuse	III	Poor	Body	NA	NA	NA	ASIAN	NA	NA	NA	1	27	FuJian	Peritoneal Metastasis	NA	NA	Missense_Mutation	NA	Missense_Mutation	NA	NA	NA	NA	NA	NA	1
NO661700	F	67	intestinal	III	Well	Cardia	NA	NA	NA	ASIAN	NA	NA	NA	1	15	FuJian	Not	NA	NA	Missense_Mutation	NA	NA	NA	NA	NA	NA	NA	NA	1
NO661905	F	47	intestinal	III	Well	Body	NA	NA	NA	ASIAN	NA	NA	NA	1	22	FuJian	Peritoneal Metastasis	NA	NA	Missense_Mutation	NA	NA	NA	NA	NA	NA	NA	NA	1
NO670704	M	63	diffuse	III	Poor	Cardia	NA	NA	NA	ASIAN	NA	NA	NA	1	9.25	FuJian	Peritoneal Metastasis	NA	NA	Missense_Mutation	NA	Missense_Mutation	Missense_Mutation	NA	NA	NA	NA	NA	1
NO671858	F	57	diffuse	IV	Poor	Body	NA	NA	NA	ASIAN	NA	NA	NA	1	35	FuJian	Peritoneal Metastasis	NA	NA	NA	NA	NA	NA	NA	NA	NA	NA	NA	1
NO672056	M	85	intestinal	III	NA	Body	NA	NA	NA	ASIAN	NA	NA	NA	1	50	FuJian	Not	Nonsense_Mutation	NA	Splice_Site	NA	NA	NA	NA	NA	NA	NA	NA	1
NO672271	M	68	intestinal	III	Well	Antrum	NA	NA	NA	ASIAN	NA	NA	NA	1	30	FuJian	Peritoneal Metastasis	NA	NA	Missense_Mutation	NA	NA	NA	NA	NA	NA	NA	NA	1
NO672561	M	40	mixed	III	Poor	Body	NA	NA	NA	ASIAN	NA	NA	NA	1	3	FuJian	Not	NA	NA	NA	NA	NA	NA	NA	NA	Missense_Mutation	NA	NA	1
NO674592	M	50	diffuse	III	Poor	Antrum	NA	NA	NA	ASIAN	NA	NA	NA	1	7	FuJian	Not	NA	NA	NA	NA	NA	NA	NA	NA	NA	NA	NA	1
NO675242	F	59	mixed	III	Poor	Cardia	NA	NA	NA	ASIAN	NA	NA	NA	1	13.25	FuJian	Not	NA	NA	NA	NA	NA	NA	NA	NA	NA	NA	NA	1
NO675798	M	52	intestinal	I	Well	Body	NA	NA	NA	ASIAN	NA	NA	NA	0	56	FuJian	Not	NA	NA	NA	NA	NA	NA	NA	NA	NA	NA	NA	0
NO676726	M	59	diffuse	III	Well	Body	NA	NA	NA	ASIAN	NA	NA	NA	0	55	FuJian	Not	NA	NA	NA	NA	NA	NA	NA	NA	NA	NA	NA	1
NO676745	M	75	diffuse	III	Poor	Body	NA	NA	NA	ASIAN	NA	NA	NA	1	13	FuJian	Not	NA	NA	NA	NA	NA	NA	NA	NA	NA	NA	NA	1
NO678167	M	79	diffuse	III	Poor	Antrum	NA	NA	NA	ASIAN	NA	NA	NA	1	35	FuJian	Peritoneal Metastasis	NA	NA	NA	NA	NA	Missense_Mutation	NA	NA	NA	NA	NA	0
NO679820	M	62	diffuse	III	Poor	Antrum	NA	NA	NA	ASIAN	NA	NA	NA	1	47	FuJian	Not	NA	NA	Missense_Mutation	NA	NA	NA	NA	NA	NA	NA	NA	1
NO681238	F	63	intestinal	II	Poor	Cardia	NA	NA	NA	ASIAN	NA	NA	NA	0	55	FuJian	Not	NA	NA	nonframeshift_insertion	NA	NA	NA	NA	NA	NA	NA	NA	0
NO683001	M	62	intestinal	III	Poor	Body	NA	NA	NA	ASIAN	NA	NA	NA	1	29	FuJian	Not	NA	NA	NA	NA	NA	NA	NA	NA	NA	NA	NA	1
NO684074	M	52	diffuse	III	Poor	Antrum	NA	NA	NA	ASIAN	NA	NA	NA	1	8.25	FuJian	Peritoneal Metastasis	NA	NA	NA	NA	NA	NA	NA	NA	NA	NA	NA	0
NO685208	M	72	intestinal	III	Poor	Cardia	NA	NA	NA	ASIAN	NA	NA	NA	1	10	FuJian	Not	NA	NA	NA	NA	NA	NA	NA	NA	NA	NA	NA	1
NO685372	M	61	intestinal	III	Poor	Antrum	NA	NA	NA	ASIAN	NA	NA	NA	1	7	FuJian	Peritoneal Metastasis	NA	NA	Missense_Mutation	NA	NA	NA	NA	NA	NA	NA	NA	0
NO686709	F	53	intestinal	III	Well	Cardia	NA	NA	NA	ASIAN	NA	NA	NA	1	20	FuJian	Peritoneal Metastasis	NA	NA	Missense_Mutation	NA	NA	NA	NA	NA	NA	NA	NA	1
NO688742	M	60	diffuse	III	Poor	Diffuse	NA	NA	NA	ASIAN	NA	NA	NA	1	7	FuJian	Not	NA	NA	Missense_Mutation	NA	NA	NA	NA	NA	NA	NA	NA	1
NO689736	M	65	diffuse	III	Poor	Antrum	NA	NA	NA	ASIAN	NA	NA	NA	1	41	FuJian	Peritoneal Metastasis	NA	NA	NA	NA	NA	NA	NA	NA	NA	NA	NA	1
NO692485	M	54	mixed	III	Poor	Diffuse	NA	NA	NA	ASIAN	NA	NA	NA	1	21	FuJian	Peritoneal Metastasis	NA	NA	NA	NA	NA	NA	NA	NA	NA	NA	NA	1
NO695093	F	70	intestinal	III	Well	Antrum	NA	NA	NA	ASIAN	NA	NA	NA	1	3.5	FuJian	Not	NA	NA	NA	NA	NA	NA	NA	NA	NA	NA	NA	1
NO695141	F	32	intestinal	IV	Poor	Body	NA	NA	NA	ASIAN	NA	NA	NA	1	1	FuJian	Peritoneal Metastasis	NA	NA	NA	NA	NA	NA	NA	NA	NA	NA	NA	1
NO698199	M	59	diffuse	III	Poor	Body	NA	NA	NA	ASIAN	NA	NA	NA	1	10.5	FuJian	Peritoneal Metastasis	NA	NA	NA	NA	NA	NA	NA	NA	NA	NA	NA	1
NO698505	M	55	intestinal	III	Poor	Body	NA	NA	NA	ASIAN	NA	NA	NA	1	15	FuJian	Not	NA	NA	Missense_Mutation	Missense_Mutation	NA	Missense_Mutation	NA	NA	NA	NA	NA	1
NO701534	M	71	diffuse	III	Poor	Cardia	NA	NA	NA	ASIAN	NA	NA	NA	0	48	FuJian	Not	NA	NA	Missense_Mutation	NA	NA	NA	NA	NA	NA	NA	NA	1
NO702241	F	85	NA	I	Well	Cardia	NA	NA	NA	ASIAN	NA	NA	NA	0	50	FuJian	Not	NA	NA	Frame_Shift_Del	NA	NA	NA	NA	NA	NA	NA	Missense_Mutation	0
NO704023	M	75	intestinal	I	Well	Cardia	NA	NA	NA	ASIAN	NA	NA	NA	0	48	FuJian	Not	NA	NA	NA	NA	NA	NA	NA	NA	NA	NA	NA	0
NO706839	M	70	mixed	III	Poor	Cardia	NA	NA	NA	ASIAN	NA	NA	NA	1	13	FuJian	Peritoneal Metastasis	NA	NA	NA	NA	NA	NA	NA	NA	NA	NA	NA	1
NO713480	M	70	diffuse	III	Poor	Antrum	NA	NA	NA	ASIAN	NA	NA	NA	1	19	FuJian	Not	NA	NA	Missense_Mutation	NA	NA	NA	NA	NA	NA	NA	NA	1
NO715051	M	66	mixed	III	Poor	Antrum	NA	NA	NA	ASIAN	NA	NA	NA	1	1	FuJian	Not	NA	NA	Frame_Shift_Ins	NA	Missense_Mutation	NA	NA	NA	NA	NA	NA	1
NO716302	F	35	diffuse	III	Poor	Diffuse	NA	NA	NA	ASIAN	NA	NA	NA	1	17	FuJian	Peritoneal Metastasis	NA	NA	NA	NA	NA	NA	NA	NA	NA	NA	NA	1
NO718568	M	58	intestinal	III	Poor	Antrum	NA	NA	NA	ASIAN	NA	NA	NA	1	24	FuJian	Peritoneal Metastasis	NA	NA	NA	NA	NA	NA	NA	NA	NA	NA	NA	0
NO719047	M	68	intestinal	III	Well	Diffuse	NA	NA	NA	ASIAN	NA	NA	NA	1	1	FuJian	Not	NA	NA	Missense_Mutation	NA	NA	NA	NA	NA	NA	NA	NA	1
NO722013	F	71	intestinal	II	Well	Antrum	NA	NA	NA	ASIAN	NA	NA	NA	0	45	FuJian	Not	NA	NA	NA	NA	NA	Missense_Mutation	NA	NA	NA	NA	NA	1
NO723406	F	74	diffuse	I	Poor	Body	NA	NA	NA	ASIAN	NA	NA	NA	0	44	FuJian	Not	NA	NA	NA	NA	NA	NA	NA	NA	NA	NA	NA	1

## Sheet: TCGA
Sample	Sex	Age	Lauren	Stage	Differentiation	Location	EBV_status	H_pylori_status	MSI_status	Race	histological_grade	OS	OS.time(months)	PFI	PFI.time(months)	Study	Documented recurrence	APC	KRAS	TP53	SMAD4	PTPRT	LRP1B	ATM	BRAF	PIK3CA	PIK3R1	TCF7L2
TCGA-3M-AB46	M	70	NA	I	NA	NA	NA	negative	MSS	WHITE	G2	0	58.8333	0	58.8333	TCGA	NA	NA	Missense_Mutation	Frame_Shift_Del	NA	NA	Missense_Mutation;Missense_Mutation	NA	NA	NA	NA	NA
TCGA-3M-AB47	M	51	NA	III	NA	NA	NA	negative	MSI-L	WHITE	G3	1	NA	1	13.1667	TCGA	Locoregional Recurrence	NA	NA	NA	NA	NA	Missense_Mutation;Missense_Mutation	NA	NA	NA	NA	NA
TCGA-B7-5816	F	51	diffuse	II	NA	Body	NA	NA	MSI-H	WHITE	G3	0	27.0667	0	27.0667	TCGA	NA	NA	NA	NA	NA	NA	Missense_Mutation;Nonsense_Mutation;Missense_Mutation;Missense_Mutation	NA	NA	Missense_Mutation	NA	NA
TCGA-B7-5818	M	62	diffuse	I	NA	Body	NA	NA	MSI-L	WHITE	G3	0	11.8667	0	11.8667	TCGA	NA	NA	NA	Splice_Site	NA	NA	NA	NA	NA	Missense_Mutation	NA	NA
TCGA-B7-A5TI	M	52	diffuse	III	NA	Body	NA	positive	MSI-H	WHITE	G3	0	19.8333	0	19.8333	TCGA	NA	NA	NA	Nonsense_Mutation;Missense_Mutation	NA	NA	NA	NA	NA	NA	NA	NA
TCGA-B7-A5TJ	M	74	intestinal	II	NA	Body	NA	positive	MSI-H	WHITE	G1	0	11.1667	0	11.1667	TCGA	NA	NA	Missense_Mutation	In_Frame_Del	NA	NA	NA	NA	NA	NA	NA	NA
TCGA-B7-A5TK	M	51	intestinal	III	NA	NA	NA	positive	MSS	WHITE	G3	0	9.6	0	9.6	TCGA	NA	NA	Missense_Mutation	NA	NA	NA	NA	NA	NA	Missense_Mutation	NA	NA
TCGA-B7-A5TN	M	60	NA	II	NA	Body	NA	positive	MSS	WHITE	G2	0	9.56667	0	9.56667	TCGA	NA	NA	NA	Missense_Mutation	NA	NA	NA	NA	NA	NA	NA	NA
TCGA-BR-4183	F	55	NA	III	NA	Cardia	NA	NA	MSS	WHITE	G3	1	6.7	0	6.7	TCGA	NA	NA	NA	Splice_Site	NA	NA	NA	NA	NA	NA	NA	NA
TCGA-BR-4184	M	70	NA	III	NA	Antrum	NA	NA	MSI-H	WHITE	G2	1	7.06667	0	7.06667	TCGA	NA	Missense_Mutation	Missense_Mutation	Missense_Mutation	Missense_Mutation	Missense_Mutation	Missense_Mutation;Missense_Mutation	NA	NA	NA	In_Frame_Del	NA
TCGA-BR-4187	M	56	NA	NA	NA	Antrum	NA	NA	MSS	WHITE	G3	1	4.7	0	4.7	TCGA	NA	NA	NA	NA	NA	NA	NA	NA	NA	NA	NA	NA
TCGA-BR-4188	F	53	NA	NA	NA	Cardia	NA	NA	MSI-L	WHITE	G3	1	7.53333	0	7.53333	TCGA	NA	NA	NA	NA	NA	NA	NA	NA	NA	NA	NA	NA
TCGA-BR-4191	M	72	NA	NA	NA	NA	NA	NA	MSS	WHITE	G2	1	18.6	0	18.6	TCGA	NA	Frame_Shift_Del	NA	NA	NA	NA	NA	NA	NA	NA	NA	NA
TCGA-BR-4201	F	66	NA	NA	NA	Cardia	NA	NA	MSI-H	WHITE	G1	1	31.3333	0	31.3333	TCGA	NA	NA	Missense_Mutation	NA	NA	NA	Missense_Mutation	NA	Nonsense_Mutation	NA	NA	NA
TCGA-BR-4253	F	80	NA	III	NA	Body	NA	NA	MSS	WHITE	G3	1	4.13333	0	4.13333	TCGA	NA	NA	NA	NA	NA	NA	NA	NA	NA	Missense_Mutation	NA	NA
TCGA-BR-4255	F	76	NA	III	NA	NA	NA	NA	MSS	WHITE	G3	1	4.13333	0	4.13333	TCGA	NA	NA	NA	Missense_Mutation	NA	NA	NA	NA	NA	NA	NA	NA
TCGA-BR-4256	M	80	NA	NA	NA	Antrum	NA	NA	MSI-H	WHITE	G2	1	9.46667	0	9.46667	TCGA	NA	NA	NA	Missense_Mutation	NA	Missense_Mutation	Missense_Mutation;Missense_Mutation	NA	NA	NA	NA	NA
TCGA-BR-4257	F	79	NA	NA	NA	Antrum	NA	NA	MSI-H	WHITE	G2	1	9.8	0	9.8	TCGA	NA	NA	Missense_Mutation	NA	3'UTR	NA	Missense_Mutation	Missense_Mutation	NA	NA	NA	NA
TCGA-BR-4267	M	51	NA	I	NA	NA	NA	NA	MSS	WHITE	G2	1	6.26667	0	6.26667	TCGA	NA	Nonsense_Mutation	Missense_Mutation	NA	Missense_Mutation	NA	NA	NA	NA	NA	NA	NA
TCGA-BR-4279	M	43	NA	II	NA	NA	NA	NA	MSS	WHITE	G3	1	9.7	0	9.7	TCGA	NA	NA	NA	NA	Missense_Mutation	NA	NA	NA	NA	NA	NA	NA
TCGA-BR-4280	F	78	NA	III	NA	NA	NA	NA	MSI-H	WHITE	G2	1	6.7	0	6.7	TCGA	NA	NA	Missense_Mutation	NA	NA	NA	NA	NA	NA	NA	NA	Missense_Mutation
TCGA-BR-4292	F	73	NA	NA	NA	Body	NA	NA	MSI-H	WHITE	G1	0	0	0	0	TCGA	NA	NA	NA	Missense_Mutation	NA	NA	NA	Missense_Mutation	NA	NA	NA	NA
TCGA-BR-4294	M	65	intestinal	NA	NA	Body	NA	NA	MSI-L	WHITE	G2	0	0	0	0	TCGA	NA	NA	NA	NA	NA	NA	NA	NA	NA	NA	NA	NA
TCGA-BR-4357	M	58	NA	NA	NA	Body	NA	NA	MSS	WHITE	G2	0	0	0	0	TCGA	NA	NA	NA	Missense_Mutation	NA	Missense_Mutation	NA	NA	NA	NA	NA	NA
TCGA-BR-4361	F	66	NA	III	NA	NA	NA	NA	MSI-H	WHITE	G3	0	0	0	0	TCGA	NA	Missense_Mutation	Missense_Mutation	Missense_Mutation;Missense_Mutation	NA	NA	Missense_Mutation;Missense_Mutation	Missense_Mutation	NA	Missense_Mutation	Missense_Mutation	NA
TCGA-BR-4362	F	74	NA	NA	NA	NA	NA	NA	MSI-H	WHITE	G3	0	0	0	0	TCGA	NA	Missense_Mutation	NA	NA	NA	NA	NA	NA	NA	NA	NA	NA
TCGA-BR-4363	F	60	NA	NA	NA	Body	NA	NA	MSI-H	WHITE	G3	0	0	0	0	TCGA	NA	NA	NA	Frame_Shift_Del;Nonsense_Mutation	NA	NA	NA	NA	NA	NA	NA	Frame_Shift_Del
TCGA-BR-4366	M	87	NA	NA	NA	Antrum	NA	NA	MSS	WHITE	G2	0	0	0	0	TCGA	NA	NA	NA	Nonsense_Mutation	NA	NA	Splice_Site;Missense_Mutation	NA	NA	NA	NA	NA
TCGA-BR-4367	M	78	NA	NA	NA	Antrum	NA	NA	MSS	WHITE	G3	0	0	0	0	TCGA	NA	NA	NA	NA	NA	NA	NA	NA	NA	NA	NA	NA
TCGA-BR-4368	F	78	NA	IV	NA	Antrum	NA	NA	MSI-H	WHITE	G3	0	0	0	0	TCGA	NA	NA	Missense_Mutation	NA	NA	Missense_Mutation	NA	NA	NA	NA	NA	NA
TCGA-BR-4369	M	75	NA	NA	NA	Cardia	NA	NA	MSS	WHITE	G3	0	0	0	0	TCGA	NA	Missense_Mutation	NA	NA	NA	NA	NA	NA	NA	3'UTR	Nonsense_Mutation	NA
TCGA-BR-4370	F	74	NA	NA	NA	Antrum	NA	NA	MSI-H	WHITE	G2	0	0	0	0	TCGA	NA	NA	NA	NA	NA	NA	NA	Frame_Shift_Del	NA	NA	NA	NA
TCGA-BR-4371	F	71	NA	NA	NA	NA	NA	NA	MSS	WHITE	G1	0	0	0	0	TCGA	NA	NA	NA	NA	NA	NA	NA	NA	NA	Missense_Mutation;Missense_Mutation	NA	NA
TCGA-BR-6452	F	78	NA	II	NA	Body	NA	NA	MSI-H	WHITE	G3	0	35.1667	0	35.1667	TCGA	NA	Missense_Mutation;Missense_Mutation	NA	NA	3'UTR;3'UTR	Missense_Mutation;Missense_Mutation;Missense_Mutation;Missense_Mutation	Nonsense_Mutation;Nonsense_Mutation	Frame_Shift_Del;Frame_Shift_Ins;Missense_Mutation;Frame_Shift_Del;Frame_Shift_Ins;Missense_Mutation	NA	Missense_Mutation;Missense_Mutation;Missense_Mutation;Missense_Mutation;Missense_Mutation;Missense_Mutation	Intron;Missense_Mutation;Intron;Missense_Mutation	NA
TCGA-BR-6453	M	54	NA	II	NA	Body	NA	NA	MSS	WHITE	G3	0	16.1667	0	16.1667	TCGA	NA	NA	NA	NA	NA	3'UTR	Missense_Mutation	NA	NA	NA	NA	NA
TCGA-BR-6454	M	58	NA	II	NA	Cardia	NA	NA	MSS	WHITE	G3	0	0	0	0	TCGA	NA	NA	NA	NA	NA	NA	NA	Frame_Shift_Del;Nonsense_Mutation	NA	Missense_Mutation	NA	NA
TCGA-BR-6455	M	59	NA	II	NA	Body	NA	NA	MSS	WHITE	G3	1	14.0667	1	12.8333	TCGA	Distant Metastasis	NA	NA	NA	NA	NA	NA	NA	NA	Missense_Mutation	NA	NA
TCGA-BR-6456	F	74	NA	II	NA	Body	NA	NA	MSS	WHITE	G2	1	17.5333	0	17.5333	TCGA	NA	NA	NA	Missense_Mutation;Missense_Mutation	NA	NA	NA	NA	NA	NA	NA	NA
TCGA-BR-6457	M	69	NA	II	NA	Body	NA	NA	MSS	WHITE	G3	0	13.8667	0	13.8667	TCGA	NA	NA	NA	Nonsense_Mutation;Nonsense_Mutation	NA	NA	NA	NA	NA	NA	NA	NA
TCGA-BR-6458	F	57	NA	II	NA	Body	NA	NA	MSI-L	WHITE	G3	1	19.6	1	19.1333	TCGA	Distant Metastasis	NA	NA	Missense_Mutation;Missense_Mutation	NA	NA	NA	NA	NA	NA	NA	NA
TCGA-BR-6563	M	60	NA	II	NA	Antrum	NA	NA	MSS	WHITE	G3	0	39.6667	1	4.93333	TCGA	New Primary Tumor	Missense_Mutation	NA	NA	NA	NA	NA	NA	NA	NA	NA	NA
TCGA-BR-6564	F	46	diffuse	III	NA	Body	NA	NA	MSS	WHITE	G3	1	26.4667	0	26.4667	TCGA	NA	NA	NA	NA	In_Frame_Del;In_Frame_Del	NA	NA	NA	NA	NA	NA	NA
TCGA-BR-6565	M	67	NA	II	NA	Body	NA	NA	MSS	WHITE	G2	1	9.3	1	9.3	TCGA	NA	Nonsense_Mutation	NA	Missense_Mutation	NA	NA	Missense_Mutation	NA	NA	NA	NA	NA
TCGA-BR-6566	F	64	NA	II	NA	Body	NA	NA	MSI-H	WHITE	G3	0	33.2333	0	33.2333	TCGA	NA	NA	NA	NA	NA	NA	Missense_Mutation;Missense_Mutation	Missense_Mutation;Missense_Mutation	NA	NA	NA	NA
TCGA-BR-6705	F	68	NA	III	NA	Body	NA	NA	MSI-L	WHITE	G3	1	25.9667	1	25.9667	TCGA	NA	NA	Missense_Mutation	NA	NA	NA	NA	NA	NA	NA	NA	NA
TCGA-BR-6706	M	63	NA	III	NA	Cardia	NA	NA	MSS	WHITE	G3	1	18.3	1	13.4	TCGA	Locoregional Recurrence	NA	NA	NA	NA	Frame_Shift_Del;Frame_Shift_Del	Missense_Mutation;Missense_Mutation	NA	NA	Missense_Mutation;Missense_Mutation	NA	NA
TCGA-BR-6707	M	75	NA	II	NA	Body	NA	NA	MSS	WHITE	G3	0	16.3667	1	14.2	TCGA	Locoregional Recurrence	NA	NA	NA	NA	NA	NA	NA	NA	Missense_Mutation	NA	NA
TCGA-BR-6709	F	57	NA	III	NA	Cardia	NA	NA	MSS	WHITE	G3	1	12.3333	1	12.3333	TCGA	NA	NA	NA	NA	NA	NA	NA	NA	NA	NA	NA	NA
TCGA-BR-6710	M	41	NA	I	NA	Gastroesophageal Junction	NA	NA	MSS	WHITE	G2	0	9.1	0	9.1	TCGA	NA	NA	NA	NA	NA	NA	NA	NA	NA	NA	NA	NA
TCGA-BR-6801	M	70	NA	II	NA	Body	NA	NA	MSI-L	WHITE	G2	0	40.7667	0	40.7667	TCGA	NA	NA	NA	NA	NA	NA	NA	NA	NA	NA	NA	NA
TCGA-BR-6802	M	65	NA	III	NA	Body	NA	NA	MSI-H	WHITE	G3	0	31.3333	1	26.9	TCGA	Distant Metastasis	Frame_Shift_Ins;Frame_Shift_Ins	Missense_Mutation;Missense_Mutation	NA	NA	NA	NA	Missense_Mutation;Missense_Mutation	NA	Missense_Mutation;Missense_Mutation	NA	NA
TCGA-BR-6803	F	54	diffuse	II	NA	Body	NA	NA	MSS	WHITE	G3	0	31.6333	0	31.6333	TCGA	NA	NA	NA	Missense_Mutation;Missense_Mutation	NA	NA	NA	NA	NA	NA	NA	NA
TCGA-BR-6852	F	64	NA	II	NA	Gastroesophageal Junction	NA	NA	MSI-H	WHITE	G3	0	45.5667	0	45.5667	TCGA	NA	NA	NA	NA	NA	Nonsense_Mutation;Splice_Region;Missense_Mutation;Nonsense_Mutation;Splice_Region;Missense_Mutation	NA	NA	NA	NA	NA	NA
TCGA-BR-7196	M	64	NA	IV	NA	Cardia	NA	NA	MSS	WHITE	G3	0	22.2	1	11.6	TCGA	Distant Metastasis	NA	NA	NA	NA	NA	NA	NA	NA	Missense_Mutation	NA	NA
TCGA-BR-7197	M	69	NA	II	NA	Antrum	NA	NA	MSS	WHITE	GX	0	9.33333	0	9.33333	TCGA	NA	Nonsense_Mutation;Nonsense_Mutation	NA	Nonsense_Mutation;Nonsense_Mutation	NA	NA	Missense_Mutation;Missense_Mutation	NA	NA	NA	NA	NA
TCGA-BR-7703	M	81	intestinal	I	NA	Body	NA	NA	MSI-H	WHITE	G2	0	36.6667	0	36.6667	TCGA	NA	Nonsense_Mutation;Frame_Shift_Del;Nonsense_Mutation;Frame_Shift_Del	Missense_Mutation;Missense_Mutation	Missense_Mutation;Missense_Mutation	NA	NA	Frame_Shift_Del;Frame_Shift_Del	NA	NA	NA	NA	Missense_Mutation;Missense_Mutation
TCGA-BR-7704	F	69	intestinal	II	NA	Body	NA	NA	MSS	WHITE	G3	0	35.7333	0	35.7333	TCGA	NA	Nonsense_Mutation;In_Frame_Del;Nonsense_Mutation;In_Frame_Del	NA	NA	NA	NA	NA	NA	NA	NA	NA	NA
TCGA-BR-7707	F	69	NA	I	NA	Body	NA	NA	MSI-H	WHITE	G3	0	36.3333	0	36.3333	TCGA	NA	NA	Missense_Mutation	In_Frame_Del	NA	NA	NA	Missense_Mutation	NA	NA	NA	NA
TCGA-BR-7715	M	65	NA	II	NA	Body	NA	NA	MSS	WHITE	G2	0	34.1	0	34.1	TCGA	NA	NA	NA	Missense_Mutation;Missense_Mutation	NA	NA	NA	NA	NA	NA	NA	NA
TCGA-BR-7716	F	62	NA	II	NA	Body	NA	NA	MSS	WHITE	G2	0	40.3333	0	40.3333	TCGA	NA	NA	NA	Missense_Mutation;Missense_Mutation	NA	NA	NA	NA	NA	NA	NA	NA
TCGA-BR-7717	M	63	NA	IV	NA	Cardia	NA	NA	MSS	WHITE	G2	1	18.4	0	18.4	TCGA	NA	NA	NA	NA	NA	NA	NA	Missense_Mutation;Missense_Mutation	NA	NA	NA	NA
TCGA-BR-7722	M	62	NA	II	NA	Gastroesophageal Junction	NA	NA	MSS	WHITE	G3	1	15.5333	0	15.5333	TCGA	NA	NA	NA	NA	Missense_Mutation	NA	NA	NA	NA	NA	NA	NA
TCGA-BR-7723	M	59	NA	III	NA	Body	NA	NA	MSI-L	WHITE	G3	1	29.1333	1	18.6333	TCGA	Distant Metastasis	NA	NA	Splice_Site	NA	NA	Missense_Mutation	NA	NA	NA	NA	NA
TCGA-BR-7851	M	74	intestinal	II	NA	Body	NA	NA	MSI-H	WHITE	G3	1	NA	0	NA	TCGA	NA	NA	NA	NA	NA	NA	Missense_Mutation;Missense_Mutation	Missense_Mutation;Missense_Mutation	NA	Missense_Mutation;Missense_Mutation	NA	NA
TCGA-BR-7901	M	74	NA	II	NA	Gastroesophageal Junction	NA	NA	MSS	WHITE	G2	1	3.5	1	3.03333	TCGA	Locoregional Recurrence	NA	NA	Missense_Mutation	NA	NA	NA	NA	NA	NA	NA	NA
TCGA-BR-7957	F	50	intestinal	IV	NA	Body	NA	NA	MSS	WHITE	GX	1	9.2	0	9.2	TCGA	NA	NA	NA	NA	NA	NA	NA	NA	NA	NA	NA	NA
TCGA-BR-7958	M	60	NA	III	NA	Body	NA	NA	MSS	WHITE	G3	0	29.9667	0	29.9667	TCGA	NA	NA	NA	NA	Missense_Mutation	NA	Missense_Mutation;Missense_Mutation	NA	NA	NA	NA	NA
TCGA-BR-7959	M	59	intestinal	III	NA	Cardia	NA	NA	MSI-L	WHITE	G3	0	33.6667	0	33.6667	TCGA	NA	NA	NA	NA	NA	NA	Missense_Mutation	NA	NA	NA	NA	NA
TCGA-BR-8058	F	53	NA	III	NA	Antrum	NA	NA	MSI-L	WHITE	G3	0	37.7667	1	2.96667	TCGA	New Primary Tumor	NA	NA	NA	NA	NA	NA	NA	NA	NA	NA	NA
TCGA-BR-8059	M	72	intestinal	III	NA	Body	NA	NA	MSI-H	WHITE	G3	1	14.6333	0	14.6333	TCGA	NA	NA	Missense_Mutation	NA	NA	Missense_Mutation	Missense_Mutation	NA	Missense_Mutation	NA	NA	NA
TCGA-BR-8060	F	75	NA	II	NA	Cardia	NA	NA	MSS	WHITE	G3	1	11.6	0	11.6	TCGA	NA	NA	NA	In_Frame_Del	NA	NA	NA	NA	NA	NA	NA	NA
TCGA-BR-8077	F	58	intestinal	III	NA	Body	NA	NA	MSS	WHITE	G2	0	0.7	0	0.7	TCGA	NA	NA	NA	Missense_Mutation	NA	NA	NA	NA	NA	NA	NA	NA
TCGA-BR-8078	F	70	NA	II	NA	Body	NA	NA	MSI-H	WHITE	G3	0	30	0	30	TCGA	NA	NA	Missense_Mutation	NA	NA	NA	NA	NA	NA	NA	NA	Missense_Mutation
TCGA-BR-8080	F	72	intestinal	III	NA	Body	NA	NA	MSS	WHITE	G3	1	9.73333	0	9.73333	TCGA	NA	NA	NA	Missense_Mutation	NA	NA	Missense_Mutation;Missense_Mutation	NA	NA	NA	NA	NA
TCGA-BR-8081	F	71	NA	II	NA	Body	NA	NA	MSI-H	WHITE	G2	0	32.7	0	32.7	TCGA	NA	Missense_Mutation;Missense_Mutation	NA	Frame_Shift_Del	NA	NA	NA	Frame_Shift_Ins;Missense_Mutation	NA	Missense_Mutation	NA	NA
TCGA-BR-8284	F	72	intestinal	III	NA	Antrum	NA	NA	MSI-H	WHITE	G3	1	8.16667	0	8.16667	TCGA	NA	NA	NA	NA	NA	NA	NA	NA	NA	NA	NA	NA
TCGA-BR-8285	F	57	intestinal	III	NA	Body	NA	NA	MSS	WHITE	G3	1	0.566667	0	0.566667	TCGA	NA	NA	NA	NA	NA	NA	NA	NA	NA	NA	NA	NA
TCGA-BR-8286	M	49	NA	II	NA	Antrum	NA	NA	MSI-L	WHITE	G3	0	29.8333	0	29.8333	TCGA	NA	NA	NA	Missense_Mutation	NA	NA	NA	NA	NA	NA	NA	NA
TCGA-BR-8289	M	57	intestinal	IV	NA	Body	NA	NA	MSS	WHITE	G3	1	2.7	0	2.7	TCGA	NA	NA	NA	Missense_Mutation	NA	NA	Splice_Site	NA	NA	NA	NA	NA
TCGA-BR-8291	M	61	diffuse	II	NA	Antrum	NA	NA	MSS	WHITE	GX	1	20.2333	0	20.2333	TCGA	NA	NA	NA	NA	NA	NA	NA	NA	NA	NA	NA	NA
TCGA-BR-8295	F	60	NA	II	NA	Body	NA	NA	MSI-L	WHITE	G3	1	2.23333	1	2.23333	TCGA	NA	NA	NA	In_Frame_Del	NA	NA	NA	NA	NA	NA	NA	NA
TCGA-BR-8296	F	58	intestinal	III	NA	Body	NA	NA	MSS	WHITE	G3	1	15.8	1	13	TCGA	Distant Metastasis	NA	NA	Missense_Mutation	NA	NA	NA	NA	NA	NA	NA	NA
TCGA-BR-8297	M	58	diffuse	III	NA	Body	NA	NA	MSS	WHITE	GX	0	7.5	0	7.5	TCGA	NA	NA	NA	Missense_Mutation	NA	NA	Missense_Mutation;Missense_Mutation	NA	NA	NA	NA	NA
TCGA-BR-8360	M	66	intestinal	II	NA	Body	NA	NA	MSI-H	WHITE	G2	0	6.26667	0	6.26667	TCGA	NA	NA	NA	Nonsense_Mutation;Missense_Mutation	NA	NA	Missense_Mutation	NA	NA	Missense_Mutation	NA	NA
TCGA-BR-8361	F	71	NA	III	NA	Body	NA	NA	MSI-H	WHITE	G3	0	31.5333	0	31.5333	TCGA	NA	NA	NA	Missense_Mutation	Frame_Shift_Del;Frame_Shift_Del	Frame_Shift_Del;Missense_Mutation	Missense_Mutation;Missense_Mutation;Missense_Mutation	Frame_Shift_Del	NA	NA	NA	NA
TCGA-BR-8362	M	65	NA	III	NA	Body	NA	NA	MSS	WHITE	G3	1	13.2667	1	11.8667	TCGA	Distant Metastasis	NA	NA	NA	NA	NA	NA	NA	NA	NA	NA	NA
TCGA-BR-8363	F	73	NA	I	NA	Antrum	NA	NA	MSI-H	WHITE	G3	1	0.266667	0	0.266667	TCGA	NA	Missense_Mutation	NA	NA	NA	NA	NA	Frame_Shift_Del	NA	NA	NA	NA
TCGA-BR-8364	F	42	diffuse	III	NA	Body	NA	NA	MSS	WHITE	G3	0	22.5	0	22.5	TCGA	NA	NA	NA	NA	NA	NA	NA	NA	NA	NA	NA	NA
TCGA-BR-8365	F	70	NA	II	NA	Body	NA	NA	MSS	WHITE	G3	1	17.7667	1	17.7667	TCGA	NA	NA	NA	NA	NA	NA	NA	NA	NA	NA	NA	NA
TCGA-BR-8366	F	80	NA	II	NA	Body	NA	NA	MSS	WHITE	G3	0	0.966667	0	0.966667	TCGA	NA	NA	Missense_Mutation	NA	Missense_Mutation	NA	NA	NA	Missense_Mutation	Missense_Mutation;Missense_Mutation	NA	NA
TCGA-BR-8367	M	55	NA	III	NA	Body	NA	NA	MSS	WHITE	G3	1	26.7	1	19.3333	TCGA	Distant Metastasis	NA	NA	NA	NA	NA	NA	NA	NA	NA	NA	NA
TCGA-BR-8368	F	84	NA	I	NA	Body	NA	NA	MSI-H	WHITE	G3	0	4.36667	0	4.36667	TCGA	NA	NA	Missense_Mutation	NA	NA	NA	NA	Frame_Shift_Del	NA	NA	NA	NA
TCGA-BR-8369	F	76	NA	III	NA	Antrum	NA	NA	MSS	WHITE	G3	0	14.2333	1	13.9667	TCGA	Distant Metastasis	NA	NA	Splice_Site	NA	Missense_Mutation;Missense_Mutation;Splice_Region	Nonsense_Mutation;Missense_Mutation	NA	NA	NA	NA	NA
TCGA-BR-8370	M	64	diffuse	III	NA	Cardia	NA	NA	MSI-L	WHITE	G3	0	3.36667	0	3.36667	TCGA	NA	NA	Missense_Mutation	NA	Frame_Shift_Ins	NA	NA	NA	NA	NA	NA	NA
TCGA-BR-8371	M	62	NA	III	NA	Cardia	NA	NA	MSS	WHITE	G3	1	11.9667	1	11.9	TCGA	Distant Metastasis	NA	NA	NA	NA	NA	NA	NA	NA	NA	NA	NA
TCGA-BR-8372	M	63	NA	III	NA	Body	NA	NA	MSI-H	WHITE	G3	0	31.7	0	31.7	TCGA	NA	NA	NA	NA	Nonsense_Mutation;Missense_Mutation	NA	NA	NA	NA	NA	NA	NA
TCGA-BR-8373	F	65	intestinal	III	NA	Body	NA	NA	MSI-L	WHITE	G2	0	15	0	15	TCGA	NA	NA	NA	NA	NA	Missense_Mutation	NA	NA	NA	NA	NA	NA
TCGA-BR-8380	M	55	NA	III	NA	Antrum	NA	NA	MSI-L	WHITE	G3	0	0.7	1	15.5667	TCGA	Locoregional Recurrence	NA	NA	NA	NA	NA	NA	NA	NA	NA	NA	NA
TCGA-BR-8381	M	51	NA	II	NA	Body	NA	NA	MSS	WHITE	G3	0	7.46667	0	7.46667	TCGA	NA	NA	NA	NA	NA	NA	NA	NA	NA	Missense_Mutation	NA	NA
TCGA-BR-8382	F	67	NA	III	NA	Antrum	NA	NA	MSI-H	WHITE	G3	1	25.4	0	25.4	TCGA	NA	NA	NA	NA	NA	NA	NA	NA	NA	NA	NA	NA
TCGA-BR-8384	M	69	NA	III	NA	Antrum	NA	NA	MSS	WHITE	G3	0	3.76667	0	3.76667	TCGA	NA	NA	NA	NA	NA	NA	NA	NA	NA	NA	NA	NA
TCGA-BR-8483	M	59	intestinal	III	NA	Antrum	NA	NA	MSS	WHITE	G2	0	5.46667	0	5.46667	TCGA	NA	NA	NA	Splice_Site	NA	Missense_Mutation	Missense_Mutation	NA	NA	NA	NA	NA
TCGA-BR-8484	M	61	NA	III	NA	Body	NA	NA	MSS	WHITE	G2	1	25.5333	0	25.5333	TCGA	NA	NA	NA	Missense_Mutation	NA	NA	NA	NA	NA	NA	NA	NA
TCGA-BR-8485	F	68	NA	III	NA	Body	NA	NA	MSS	WHITE	G3	0	9.33333	0	9.33333	TCGA	NA	NA	NA	NA	NA	Splice_Region	Missense_Mutation	NA	NA	NA	NA	NA
TCGA-BR-8486	F	90	NA	I	NA	Body	NA	NA	MSS	WHITE	G2	0	20.5	0	20.5	TCGA	NA	NA	NA	Frame_Shift_Ins	NA	NA	Missense_Mutation	NA	NA	NA	NA	NA
TCGA-BR-8487	F	64	NA	II	NA	Antrum	NA	NA	MSI-H	WHITE	G3	0	1.13333	0	1.13333	TCGA	NA	Missense_Mutation	NA	Missense_Mutation	Missense_Mutation	Missense_Mutation	Splice_Site;Missense_Mutation;Missense_Mutation	Frame_Shift_Del	NA	Missense_Mutation	NA	NA
TCGA-BR-8588	F	55	NA	II	NA	Body	NA	NA	MSS	WHITE	G3	0	12.9667	0	12.9667	TCGA	NA	NA	NA	NA	NA	NA	NA	NA	NA	Missense_Mutation	NA	NA
TCGA-BR-8589	M	56	NA	III	NA	Body	NA	NA	MSS	WHITE	G3	0	27.5	0	27.5	TCGA	NA	NA	NA	NA	NA	NA	NA	NA	NA	Missense_Mutation	NA	NA
TCGA-BR-8590	M	62	NA	III	NA	Body	NA	NA	MSS	WHITE	G3	1	9.46667	1	7.43333	TCGA	Distant Metastasis	NA	NA	Missense_Mutation	NA	NA	NA	NA	NA	NA	NA	NA
TCGA-BR-8591	M	79	NA	III	NA	Antrum	NA	NA	MSI-H	WHITE	G3	0	28.5333	0	28.5333	TCGA	NA	NA	NA	NA	NA	NA	Missense_Mutation;Missense_Mutation	Missense_Mutation	Missense_Mutation	Missense_Mutation;Missense_Mutation	NA	NA
TCGA-BR-8592	F	63	diffuse	III	NA	Body	NA	NA	MSS	WHITE	G3	1	6.36667	0	6.36667	TCGA	NA	NA	NA	NA	NA	NA	NA	NA	NA	NA	NA	NA
TCGA-BR-8676	M	59	intestinal	III	NA	Antrum	NA	NA	MSS	WHITE	G3	0	7.63333	0	7.63333	TCGA	NA	NA	NA	NA	NA	NA	Missense_Mutation	NA	NA	Missense_Mutation;Missense_Mutation	NA	NA
TCGA-BR-8677	F	74	NA	III	NA	Antrum	NA	NA	MSS	WHITE	G3	0	27.1	0	27.1	TCGA	NA	NA	NA	NA	NA	NA	NA	NA	NA	NA	NA	NA
TCGA-BR-8678	M	76	NA	I	NA	Body	NA	NA	MSS	WHITE	G2	0	25.1333	0	25.1333	TCGA	NA	NA	NA	Nonsense_Mutation	NA	NA	Missense_Mutation;Missense_Mutation;Missense_Mutation;Frame_Shift_Del	NA	NA	NA	NA	NA
TCGA-BR-8679	F	63	NA	I	NA	Body	NA	NA	MSI-L	WHITE	G2	0	0	0	0	TCGA	NA	NA	Missense_Mutation	Frame_Shift_Del	NA	NA	NA	NA	NA	NA	NA	NA
TCGA-BR-8680	M	45	intestinal	IV	NA	Antrum	NA	NA	MSS	ASIAN	G2	0	32.4	0	32.4	TCGA	NA	Nonsense_Mutation;Missense_Mutation;Nonsense_Mutation;Nonsense_Mutation;Nonsense_Mutation	Missense_Mutation	NA	NA	Missense_Mutation;Missense_Mutation;Missense_Mutation	Missense_Mutation;Missense_Mutation;Missense_Mutation;Missense_Mutation;Missense_Mutation;Missense_Mutation;Splice_Site;Missense_Mutation;Missense_Mutation;Missense_Mutation;Nonsense_Mutation;Missense_Mutation;Missense_Mutation;Missense_Mutation	Missense_Mutation;Missense_Mutation;Nonsense_Mutation;Nonsense_Mutation;Missense_Mutation;Missense_Mutation	NA	Missense_Mutation	NA	Missense_Mutation
TCGA-BR-8682	M	52	intestinal	II	NA	Antrum	NA	negative	MSS	ASIAN	G3	0	33.0333	0	33.0333	TCGA	NA	NA	NA	Nonsense_Mutation	NA	NA	NA	NA	NA	NA	NA	NA
TCGA-BR-8683	M	75	intestinal	III	NA	Antrum	NA	NA	MSI-L	ASIAN	G3	1	10	0	10	TCGA	NA	NA	NA	Frame_Shift_Del	NA	NA	Missense_Mutation	NA	NA	NA	NA	NA
TCGA-BR-8686	M	69	intestinal	III	NA	Antrum	NA	NA	MSS	ASIAN	G3	1	21.1667	0	21.1667	TCGA	NA	NA	NA	NA	NA	NA	NA	NA	NA	Missense_Mutation	NA	NA
TCGA-BR-8687	F	67	NA	III	NA	Cardia	NA	NA	MSS	WHITE	G3	1	8.33333	1	8.33333	TCGA	NA	NA	Missense_Mutation	NA	NA	NA	NA	NA	NA	NA	NA	NA
TCGA-BR-8690	F	54	NA	III	NA	Cardia	NA	NA	MSI-L	WHITE	G2	0	10.8333	0	10.8333	TCGA	NA	NA	NA	Nonsense_Mutation	NA	NA	NA	NA	NA	NA	NA	NA
TCGA-BR-A44T	F	53	diffuse	II	NA	Cardia	NA	NA	MSS	WHITE	G3	0	34.6	1	22.7333	TCGA	Locoregional Recurrence	NA	NA	NA	NA	NA	NA	NA	NA	NA	NA	NA
TCGA-BR-A44U	M	70	NA	III	NA	Antrum	NA	NA	MSS	WHITE	G3	1	14.0667	0	14.0667	TCGA	NA	NA	NA	Missense_Mutation	NA	NA	Missense_Mutation	NA	NA	NA	NA	NA
TCGA-BR-A452	M	57	intestinal	III	NA	Antrum	NA	NA	MSS	ASIAN	G3	1	7.63333	0	7.63333	TCGA	NA	Splice_Site	NA	Missense_Mutation	NA	NA	NA	NA	NA	NA	NA	NA
TCGA-BR-A453	M	51	NA	IV	NA	Antrum	NA	NA	MSS	ASIAN	G3	1	6.16667	0	6.16667	TCGA	NA	NA	NA	NA	NA	NA	NA	NA	NA	NA	NA	NA
TCGA-BR-A4CQ	M	58	NA	III	NA	Cardia	NA	NA	MSS	WHITE	G3	0	35.4667	1	32.0667	TCGA	Distant Metastasis	NA	Missense_Mutation	Missense_Mutation	NA	NA	NA	Missense_Mutation	NA	NA	NA	NA
TCGA-BR-A4CR	F	70	NA	III	NA	Body	NA	NA	MSS	WHITE	G3	0	0	0	0	TCGA	NA	NA	NA	Missense_Mutation	NA	NA	NA	NA	NA	NA	NA	NA
TCGA-BR-A4CS	M	77	NA	III	NA	Body	NA	NA	MSS	WHITE	G3	1	1.5	0	1.5	TCGA	NA	NA	NA	Missense_Mutation	NA	NA	NA	NA	NA	NA	NA	NA
TCGA-BR-A4IU	F	34	diffuse	III	NA	Antrum	NA	NA	MSS	ASIAN	G3	0	27.9333	0	27.9333	TCGA	NA	NA	NA	Missense_Mutation	NA	NA	NA	NA	NA	NA	NA	NA
TCGA-BR-A4IV	M	47	diffuse	III	NA	Antrum	NA	NA	MSS	ASIAN	G3	1	28.9667	1	24.5667	TCGA	Locoregional Recurrence	NA	NA	NA	NA	NA	NA	NA	NA	NA	NA	NA
TCGA-BR-A4IY	M	58	NA	II	NA	Antrum	NA	NA	MSS	ASIAN	G3	0	13.0667	0	13.0667	TCGA	NA	NA	NA	Missense_Mutation	NA	NA	NA	NA	NA	NA	NA	NA
TCGA-BR-A4IZ	F	45	diffuse	III	NA	Antrum	NA	NA	MSS	ASIAN	G3	1	9.1	0	9.1	TCGA	NA	NA	NA	NA	NA	NA	NA	NA	NA	NA	NA	NA
TCGA-BR-A4J1	M	63	NA	III	NA	Antrum	NA	NA	MSS	ASIAN	G3	1	0.733333	0	0.733333	TCGA	NA	NA	NA	NA	NA	NA	NA	NA	NA	NA	NA	NA
TCGA-BR-A4J2	M	70	diffuse	II	NA	Antrum	NA	NA	MSS	ASIAN	G3	0	14.3667	0	14.3667	TCGA	NA	NA	NA	NA	NA	NA	NA	NA	NA	NA	NA	NA
TCGA-BR-A4J4	M	39	NA	III	NA	Antrum	NA	NA	MSI-L	ASIAN	G3	0	0.533333	0	0.533333	TCGA	NA	NA	NA	NA	NA	NA	NA	NA	NA	NA	NA	NA
TCGA-BR-A4J5	M	56	intestinal	III	NA	Antrum	NA	NA	MSS	ASIAN	G3	0	28.7333	0	28.7333	TCGA	NA	NA	NA	NA	NA	NA	Missense_Mutation	NA	NA	NA	NA	NA
TCGA-BR-A4J6	F	69	NA	II	NA	Cardia	NA	NA	MSS	WHITE	G2	0	0.666667	0	0.666667	TCGA	NA	NA	NA	NA	Missense_Mutation	NA	NA	NA	NA	NA	NA	NA
TCGA-BR-A4J7	M	49	intestinal	II	NA	Antrum	NA	NA	MSS	ASIAN	G3	0	32.9667	0	32.9667	TCGA	NA	NA	NA	NA	NA	NA	NA	Nonsense_Mutation	NA	NA	NA	NA
TCGA-BR-A4J8	F	71	NA	III	NA	Cardia	NA	NA	MSS	WHITE	G3	0	13.7	0	13.7	TCGA	NA	NA	NA	Frame_Shift_Ins	NA	NA	NA	NA	NA	NA	NA	NA
TCGA-BR-A4J9	M	55	NA	II	NA	Antrum	NA	NA	MSS	WHITE	G3	0	0.466667	0	0.466667	TCGA	NA	NA	NA	NA	NA	NA	NA	NA	NA	NA	NA	NA
TCGA-BR-A4PD	F	72	NA	II	NA	Body	NA	NA	MSS	WHITE	G3	0	20.9333	0	20.9333	TCGA	NA	NA	NA	Nonsense_Mutation	NA	NA	NA	NA	NA	NA	NA	NA
TCGA-BR-A4PE	F	68	NA	I	NA	Cardia	NA	NA	MSS	WHITE	G2	0	20.7	0	20.7	TCGA	NA	NA	NA	Missense_Mutation	NA	NA	Missense_Mutation	NA	NA	NA	NA	NA
TCGA-BR-A4PF	M	72	NA	III	NA	Antrum	NA	NA	MSS	WHITE	G3	0	1.16667	0	1.16667	TCGA	NA	NA	NA	Frame_Shift_Del	NA	NA	Missense_Mutation	NA	NA	Missense_Mutation	NA	NA
TCGA-BR-A4QI	F	70	NA	II	NA	Antrum	NA	negative	MSS	WHITE	G3	1	21.7333	1	12.7667	TCGA	Distant Metastasis	NA	NA	Missense_Mutation	NA	NA	Missense_Mutation	NA	NA	NA	NA	NA
TCGA-BR-A4QL	F	75	NA	III	NA	Antrum	NA	negative	MSI-H	WHITE	G2	1	16.3667	0	16.3667	TCGA	NA	NA	Missense_Mutation	NA	NA	NA	NA	NA	NA	NA	NA	Missense_Mutation
TCGA-BR-A4QM	M	65	NA	III	NA	Cardia	NA	negative	MSS	WHITE	G3	0	5.2	1	4.23333	TCGA	Locoregional Recurrence	NA	NA	NA	NA	NA	NA	NA	NA	NA	NA	NA
TCGA-CD-5798	M	82	intestinal	II	NA	Antrum	NA	NA	MSS	ASIAN	G2	0	13.6	0	13.6	TCGA	NA	NA	Missense_Mutation	NA	NA	NA	NA	Splice_Site	NA	NA	NA	NA
TCGA-CD-5799	M	45	intestinal	II	NA	Antrum	NA	NA	MSS	ASIAN	G3	0	13.2	0	13.2	TCGA	NA	NA	NA	Missense_Mutation	In_Frame_Del	NA	NA	NA	NA	NA	NA	NA
TCGA-CD-5800	F	51	intestinal	II	NA	Antrum	NA	NA	MSS	ASIAN	G1	0	13.3333	0	13.3333	TCGA	NA	NA	NA	Missense_Mutation	NA	NA	NA	NA	NA	Missense_Mutation	NA	NA
TCGA-CD-5801	M	69	NA	III	NA	Antrum	NA	NA	MSS	ASIAN	G3	1	13.3667	1	13.3667	TCGA	NA	NA	NA	NA	NA	NA	Missense_Mutation	NA	Missense_Mutation	Missense_Mutation	NA	Missense_Mutation
TCGA-CD-5802	M	58	NA	II	NA	Cardia	NA	NA	MSS	ASIAN	G2	0	13.5333	0	13.5333	TCGA	NA	NA	NA	NA	NA	NA	NA	NA	NA	NA	NA	NA
TCGA-CD-5803	F	78	NA	II	NA	Antrum	NA	NA	MSS	ASIAN	G3	1	11.3667	1	10	TCGA	Distant Metastasis	NA	NA	NA	In_Frame_Del	NA	NA	NA	NA	NA	NA	NA
TCGA-CD-5804	M	90	NA	NA	NA	Antrum	NA	negative	MSS	ASIAN	G2	0	12.2667	0	12.2667	TCGA	NA	NA	NA	Missense_Mutation	Missense_Mutation	NA	NA	NA	NA	NA	NA	NA
TCGA-CD-5813	M	60	intestinal	II	NA	Body	NA	NA	MSS	ASIAN	G3	1	12.5667	1	10.5	TCGA	Distant Metastasis	NA	NA	Missense_Mutation	NA	NA	NA	NA	NA	NA	NA	NA
TCGA-CD-8524	F	61	intestinal	II	NA	Antrum	NA	NA	MSI-L	ASIAN	G3	0	12.9333	1	2.3	TCGA	Locoregional Recurrence	NA	NA	Nonsense_Mutation	NA	NA	Missense_Mutation	NA	NA	NA	NA	NA
TCGA-CD-8525	F	82	intestinal	III	NA	Antrum	NA	NA	MSS	ASIAN	G3	0	12.7667	0	12.7667	TCGA	NA	NA	NA	Missense_Mutation	NA	NA	NA	NA	NA	NA	NA	NA
TCGA-CD-8526	F	73	intestinal	III	NA	Body	NA	NA	MSS	ASIAN	G3	0	12.7	0	12.7	TCGA	NA	NA	NA	Missense_Mutation	NA	NA	NA	NA	NA	NA	NA	NA
TCGA-CD-8527	F	72	intestinal	II	NA	Antrum	NA	NA	MSI-L	ASIAN	G2	1	7.26667	1	5.3	TCGA	Distant Metastasis	NA	NA	NA	NA	NA	Missense_Mutation;Missense_Mutation	NA	NA	NA	NA	NA
TCGA-CD-8528	F	43	NA	III	NA	Antrum	NA	NA	MSI-L	ASIAN	G3	0	12.5	0	12.5	TCGA	NA	NA	NA	Missense_Mutation	NA	NA	NA	NA	NA	NA	NA	NA
TCGA-CD-8529	M	65	intestinal	IV	NA	Antrum	NA	NA	MSS	ASIAN	G2	0	12.4667	0	12.4667	TCGA	NA	NA	NA	NA	Missense_Mutation	Missense_Mutation	NA	NA	NA	NA	NA	Missense_Mutation
TCGA-CD-8530	M	51	diffuse	II	NA	Body	NA	NA	MSS	ASIAN	G3	0	12.5667	0	12.5667	TCGA	NA	NA	NA	Missense_Mutation	NA	NA	Missense_Mutation	NA	NA	NA	NA	NA
TCGA-CD-8531	F	66	diffuse	III	NA	Body	NA	NA	MSS	ASIAN	G3	0	12.7667	0	12.7667	TCGA	NA	NA	NA	Missense_Mutation	NA	NA	NA	NA	NA	NA	NA	NA
TCGA-CD-8532	M	52	NA	II	NA	Cardia	NA	NA	MSS	ASIAN	G2	1	11.8	1	9.4	TCGA	Locoregional Recurrence	NA	NA	NA	NA	NA	NA	NA	NA	NA	NA	NA
TCGA-CD-8533	M	48	NA	II	NA	Antrum	NA	NA	MSI-L	ASIAN	G3	0	15.6	1	7.53333	TCGA	Distant Metastasis	NA	NA	Missense_Mutation	NA	NA	Nonsense_Mutation	NA	NA	NA	NA	NA
TCGA-CD-8534	M	41	diffuse	II	NA	Antrum	NA	NA	MSS	ASIAN	G3	0	12.2333	1	6.7	TCGA	Distant Metastasis	NA	NA	NA	NA	NA	NA	Missense_Mutation	NA	NA	NA	NA
TCGA-CD-8535	M	59	NA	III	NA	Body	NA	NA	MSS	ASIAN	G3	0	13	0	13	TCGA	NA	Frame_Shift_Ins	Missense_Mutation	Nonsense_Mutation	NA	NA	Missense_Mutation	NA	NA	NA	NA	NA
TCGA-CD-8536	M	74	NA	II	NA	Body	NA	NA	MSI-H	ASIAN	G3	0	12.6	0	12.6	TCGA	NA	Nonsense_Mutation	NA	NA	NA	NA	NA	NA	NA	Missense_Mutation	NA	NA
TCGA-CD-A486	M	68	NA	II	NA	Cardia	NA	NA	MSS	ASIAN	G2	1	6.4	1	2.63333	TCGA	Distant Metastasis	NA	NA	In_Frame_Del	NA	NA	Nonsense_Mutation	NA	NA	NA	NA	NA
TCGA-CD-A487	M	51	diffuse	II	NA	Antrum	NA	NA	MSS	ASIAN	G3	0	12.4667	0	12.4667	TCGA	NA	NA	NA	Missense_Mutation	NA	NA	NA	NA	NA	NA	NA	NA
TCGA-CD-A489	M	58	diffuse	II	NA	Antrum	NA	NA	MSS	ASIAN	G3	1	11.4667	1	9.23333	TCGA	Locoregional Recurrence	NA	NA	Missense_Mutation	NA	NA	NA	NA	NA	NA	NA	NA
TCGA-CD-A48A	M	57	NA	II	NA	Cardia	NA	NA	MSI-L	ASIAN	G2	0	12.6	0	12.6	TCGA	NA	NA	NA	NA	NA	NA	NA	NA	NA	NA	NA	NA
TCGA-CD-A48C	F	79	NA	II	NA	Antrum	NA	NA	MSS	ASIAN	G3	1	11.7667	1	7.66667	TCGA	Locoregional Recurrence	NA	NA	Missense_Mutation	NA	NA	Missense_Mutation;Missense_Mutation	NA	NA	NA	NA	NA
TCGA-CD-A4MG	M	76	diffuse	II	NA	Cardia	NA	NA	MSI-H	ASIAN	G3	1	6.66667	1	2.46667	TCGA	Locoregional Recurrence	Missense_Mutation	NA	NA	NA	Frame_Shift_Del	Frame_Shift_Ins;Missense_Mutation	NA	NA	NA	NA	NA
TCGA-CD-A4MH	F	86	NA	II	NA	Antrum	NA	NA	MSS	ASIAN	G2	0	12.3667	0	12.3667	TCGA	NA	NA	NA	Frame_Shift_Del	NA	NA	NA	NA	NA	NA	NA	NA
TCGA-CD-A4MI	M	62	NA	III	NA	Antrum	NA	NA	MSI-H	ASIAN	G1	1	11.9333	1	9.03333	TCGA	Locoregional Recurrence	NA	NA	NA	NA	NA	Missense_Mutation	NA	NA	Missense_Mutation	NA	NA
TCGA-CD-A4MJ	M	60	NA	I	NA	Body	NA	NA	MSI-H	ASIAN	G2	0	12.8	1	2.3	TCGA	Locoregional Recurrence	Frame_Shift_Del;Frame_Shift_Del	Missense_Mutation	NA	NA	Frame_Shift_Del	Missense_Mutation	NA	NA	NA	NA	NA
TCGA-CG-4300	M	79	NA	III	NA	Antrum	NA	NA	MSS	NA	G2	1	20.3	0	20.3	TCGA	NA	NA	NA	Missense_Mutation	NA	NA	NA	NA	NA	NA	NA	NA
TCGA-CG-4301	F	75	NA	IV	NA	Cardia	NA	NA	MSS	NA	G3	0	3.06667	0	3.06667	TCGA	NA	NA	NA	NA	NA	NA	NA	Missense_Mutation	NA	NA	NA	NA
TCGA-CG-4304	M	84	NA	I	NA	Cardia	NA	NA	MSS	NA	G2	0	NA	0	NA	TCGA	NA	NA	NA	NA	NA	NA	NA	NA	NA	NA	NA	NA
TCGA-CG-4305	M	69	NA	II	NA	Antrum	NA	NA	MSI-H	NA	G3	0	16.1667	1	15.2333	TCGA	NA	NA	NA	NA	NA	Missense_Mutation	NA	NA	NA	Missense_Mutation	NA	NA
TCGA-CG-4306	M	90	NA	IV	NA	Antrum	NA	NA	MSI-H	NA	G3	1	1.03333	0	1.03333	TCGA	NA	Missense_Mutation;Missense_Mutation	NA	NA	NA	Missense_Mutation	Missense_Mutation;Missense_Mutation	NA	NA	NA	NA	NA
TCGA-CG-4436	M	57	intestinal	I	NA	NA	NA	NA	MSI-L	NA	G2	0	8.1	0	8.1	TCGA	NA	NA	NA	Nonsense_Mutation	NA	Nonsense_Mutation	NA	NA	NA	NA	NA	NA
TCGA-CG-4437	M	83	intestinal	II	NA	Cardia	NA	NA	MSI-L	NA	G2	0	8.16667	0	8.16667	TCGA	NA	NA	NA	NA	NA	NA	NA	NA	NA	NA	NA	NA
TCGA-CG-4438	M	56	intestinal	IV	NA	Antrum	NA	NA	MSS	NA	G3	0	54.8333	0	54.8333	TCGA	NA	NA	NA	Nonsense_Mutation	NA	NA	NA	NA	NA	NA	NA	NA
TCGA-CG-4440	F	68	intestinal	IV	NA	Body	NA	NA	MSI-L	NA	G3	1	4.06667	0	4.06667	TCGA	NA	NA	NA	Frame_Shift_Del	NA	NA	NA	NA	NA	NA	NA	NA
TCGA-CG-4441	M	83	intestinal	III	NA	Body	NA	NA	MSS	NA	G2	1	14.2	0	14.2	TCGA	NA	NA	NA	NA	NA	Missense_Mutation	NA	NA	NA	NA	NA	NA
TCGA-CG-4442	M	85	intestinal	I	NA	Antrum	NA	NA	MSI-H	NA	G3	0	0	0	0	TCGA	NA	Missense_Mutation	Missense_Mutation	NA	NA	Frame_Shift_Del;Splice_Site	Frame_Shift_Del;Missense_Mutation	NA	NA	Missense_Mutation	NA	NA
TCGA-CG-4443	M	68	intestinal	I	NA	Body	NA	NA	MSS	NA	G2	0	30.4	0	30.4	TCGA	NA	NA	NA	NA	NA	NA	NA	NA	NA	NA	NA	NA
TCGA-CG-4444	M	76	diffuse	III	NA	Body	NA	NA	MSS	NA	G3	0	47.7	0	47.7	TCGA	NA	NA	NA	Missense_Mutation	NA	NA	Missense_Mutation	NA	NA	NA	NA	NA
TCGA-CG-4449	M	81	intestinal	II	NA	Antrum	NA	NA	MSI-L	NA	G2	0	19.3333	1	11.2	TCGA	NA	NA	NA	Missense_Mutation	NA	NA	NA	NA	NA	NA	NA	NA
TCGA-CG-4455	M	72	intestinal	II	NA	Cardia	NA	NA	MSS	NA	G3	0	12.2	0	12.2	TCGA	NA	NA	NA	NA	NA	NA	NA	NA	NA	NA	NA	NA
TCGA-CG-4460	F	66	intestinal	IV	NA	Body	NA	NA	MSI-H	NA	G2	1	22.3	1	16.2333	TCGA	NA	NA	NA	NA	NA	NA	NA	NA	NA	NA	NA	NA
TCGA-CG-4462	F	72	diffuse	IV	NA	Antrum	NA	NA	MSS	NA	G3	1	0	1	0	TCGA	NA	NA	NA	NA	NA	NA	NA	NA	NA	NA	NA	NA
TCGA-CG-4465	F	69	diffuse	IV	NA	Antrum	NA	NA	MSI-H	NA	G3	1	9.13333	0	9.13333	TCGA	NA	Missense_Mutation	NA	NA	NA	NA	NA	NA	Missense_Mutation	NA	NA	NA
TCGA-CG-4466	F	81	intestinal	I	NA	Cardia	NA	NA	MSI-L	NA	G2	0	19.2333	0	19.2333	TCGA	NA	NA	NA	Frame_Shift_Del	NA	NA	NA	NA	NA	NA	NA	NA
TCGA-CG-4469	M	70	intestinal	IV	NA	NA	NA	NA	MSI-L	NA	G3	1	7.16667	0	7.16667	TCGA	NA	Missense_Mutation	NA	Nonsense_Mutation	Missense_Mutation	NA	Missense_Mutation	NA	NA	NA	NA	NA
TCGA-CG-4472	M	49	NA	IV	NA	Antrum	NA	NA	MSS	NA	G3	0	12.1667	1	4.06667	TCGA	NA	NA	NA	NA	NA	NA	NA	NA	NA	NA	NA	NA
TCGA-CG-4474	F	67	diffuse	IV	NA	Antrum	NA	NA	MSS	NA	G3	0	0	0	0	TCGA	NA	NA	NA	NA	NA	NA	NA	NA	NA	Missense_Mutation	NA	NA
TCGA-CG-4475	M	76	NA	II	NA	NA	NA	NA	MSS	NA	G3	0	23.3	0	23.3	TCGA	NA	NA	NA	NA	NA	NA	NA	NA	NA	NA	NA	NA
TCGA-CG-4476	M	69	diffuse	III	NA	Body	NA	NA	MSS	NA	G3	0	0	0	0	TCGA	NA	Nonsense_Mutation;Nonsense_Mutation	NA	NA	NA	NA	Missense_Mutation	NA	NA	NA	NA	NA
TCGA-CG-4477	F	58	intestinal	I	NA	Cardia	NA	NA	MSS	NA	G3	0	31.4	1	12.1667	TCGA	NA	NA	NA	Frame_Shift_Del	NA	NA	NA	NA	NA	NA	NA	NA
TCGA-CG-5716	M	86	NA	IV	NA	Antrum	NA	NA	MSS	NA	G2	0	0	0	0	TCGA	NA	NA	NA	NA	NA	NA	NA	NA	NA	NA	NA	NA
TCGA-CG-5717	M	58	NA	II	NA	Cardia	NA	negative	MSS	NA	G3	1	7.06667	1	4	TCGA	NA	NA	NA	Missense_Mutation	NA	NA	NA	NA	NA	NA	NA	NA
TCGA-CG-5718	F	78	intestinal	II	NA	Body	NA	positive	MSS	NA	G2	1	36.5	0	36.5	TCGA	NA	Frame_Shift_Del	NA	Splice_Site	NA	NA	NA	NA	NA	NA	NA	NA
TCGA-CG-5719	F	54	intestinal	IV	NA	Body	NA	NA	MSS	NA	G1	0	1.03333	0	1.03333	TCGA	NA	NA	NA	NA	Missense_Mutation	NA	NA	NA	NA	NA	NA	NA
TCGA-CG-5720	M	71	NA	I	NA	Cardia	NA	NA	MSI-L	NA	G3	1	1	0	1	TCGA	NA	NA	NA	NA	NA	NA	NA	NA	NA	NA	NA	NA
TCGA-CG-5721	M	58	intestinal	IV	NA	Antrum	NA	positive	MSI-H	NA	G3	0	6.1	0	6.1	TCGA	NA	Missense_Mutation	NA	Missense_Mutation;Missense_Mutation;Missense_Mutation	NA	Missense_Mutation	Missense_Mutation;Missense_Mutation	Missense_Mutation;Missense_Mutation;Missense_Mutation	Missense_Mutation	Missense_Mutation;Missense_Mutation	Frame_Shift_Del;Frame_Shift_Ins	NA
TCGA-CG-5722	F	67	intestinal	IV	NA	Body	NA	NA	MSS	NA	G3	0	1	0	1	TCGA	NA	NA	NA	NA	NA	NA	NA	NA	NA	Missense_Mutation	NA	NA
TCGA-CG-5723	M	83	NA	II	NA	Cardia	NA	NA	MSI-H	NA	G3	0	106.533	0	106.533	TCGA	NA	Frame_Shift_Del	NA	Missense_Mutation	NA	Missense_Mutation	Frame_Shift_Del	Missense_Mutation;Frame_Shift_Del	NA	NA	NA	Missense_Mutation
TCGA-CG-5724	M	59	diffuse	IV	NA	Antrum	NA	NA	MSI-L	NA	G3	1	12.2	1	4.06667	TCGA	NA	NA	NA	NA	NA	NA	Missense_Mutation	NA	NA	NA	NA	NA
TCGA-CG-5725	M	72	NA	I	NA	Cardia	NA	negative	MSS	NA	G3	1	15.2333	1	5.1	TCGA	NA	NA	NA	NA	NA	NA	NA	NA	NA	NA	NA	NA
TCGA-CG-5726	M	73	intestinal	I	NA	Antrum	NA	NA	MSI-H	NA	G2	1	29.3667	0	29.3667	TCGA	NA	Frame_Shift_Del	NA	NA	NA	NA	Missense_Mutation	NA	Missense_Mutation	NA	NA	NA
TCGA-CG-5727	M	66	intestinal	II	NA	Body	NA	NA	MSI-L	NA	G3	0	80.1667	0	80.1667	TCGA	NA	NA	Missense_Mutation	Missense_Mutation	NA	NA	NA	NA	NA	NA	NA	NA
TCGA-CG-5728	F	88	intestinal	I	NA	Antrum	NA	NA	MSI-H	NA	G3	0	66	0	66	TCGA	NA	NA	NA	NA	NA	Missense_Mutation	Frame_Shift_Del	Missense_Mutation	NA	Missense_Mutation	NA	NA
TCGA-CG-5730	F	80	intestinal	IV	NA	Cardia	NA	NA	MSS	NA	G2	0	4.06667	0	4.06667	TCGA	NA	NA	NA	Missense_Mutation	NA	NA	NA	NA	NA	NA	NA	NA
TCGA-CG-5732	M	66	intestinal	IV	NA	Cardia	NA	NA	MSS	NA	G2	1	70	1	64.9667	TCGA	NA	NA	NA	NA	NA	NA	Missense_Mutation	NA	NA	NA	NA	NA
TCGA-CG-5733	F	83	intestinal	III	NA	Antrum	NA	NA	MSI-H	NA	G3	1	21.3667	1	14.2333	TCGA	NA	Missense_Mutation	NA	NA	NA	NA	NA	NA	NA	Missense_Mutation	NA	NA
TCGA-CG-5734	M	68	intestinal	III	NA	Body	NA	NA	MSI-L	NA	G3	1	8.1	0	8.1	TCGA	NA	NA	NA	Frame_Shift_Del	NA	NA	NA	NA	NA	NA	NA	NA
TCGA-D7-5577	F	53	intestinal	III	NA	Cardia	NA	negative	MSS	WHITE	G2	1	26.0667	1	12.5333	TCGA	Locoregional Recurrence|Distant Metastasis	NA	NA	NA	NA	NA	NA	NA	NA	Missense_Mutation;Missense_Mutation	NA	NA
TCGA-D7-5578	M	80	intestinal	III	NA	Body	NA	NA	MSI-L	WHITE	G3	0	12.8333	0	12.8333	TCGA	NA	NA	NA	Missense_Mutation	NA	NA	NA	NA	NA	Missense_Mutation	NA	NA
TCGA-D7-5579	M	74	intestinal	III	NA	Body	NA	NA	MSS	WHITE	G3	0	21.2	0	21.2	TCGA	NA	NA	NA	Splice_Region	NA	NA	NA	NA	NA	NA	NA	NA
TCGA-D7-6518	M	75	diffuse	III	NA	Cardia	NA	NA	MSS	WHITE	G3	0	19.4	0	19.4	TCGA	NA	NA	NA	Missense_Mutation	NA	NA	NA	NA	NA	NA	NA	NA
TCGA-D7-6519	F	64	diffuse	NA	NA	Cardia	NA	negative	MSS	WHITE	G3	0	20.8333	1	14.3	TCGA	Distant Metastasis	NA	NA	NA	NA	NA	NA	NA	NA	NA	NA	NA
TCGA-D7-6520	M	53	intestinal	III	NA	Antrum	NA	NA	MSS	WHITE	G3	0	19.1	1	1.53333	TCGA	Distant Metastasis	NA	NA	Missense_Mutation	NA	NA	NA	NA	NA	NA	NA	NA
TCGA-D7-6521	M	65	diffuse	NA	NA	Body	NA	NA	MSI-L	WHITE	G3	0	18.8	1	6.4	TCGA	Locoregional Recurrence	NA	NA	Missense_Mutation	NA	NA	NA	NA	NA	NA	NA	NA
TCGA-D7-6522	M	58	diffuse	I	NA	Antrum	NA	NA	MSS	WHITE	G3	0	18.8667	0	18.8667	TCGA	NA	NA	NA	NA	NA	NA	NA	NA	NA	NA	NA	NA
TCGA-D7-6524	M	53	diffuse	II	NA	Antrum	NA	NA	MSS	WHITE	G3	0	18.1	1	18.1	TCGA	Locoregional Recurrence	NA	NA	NA	NA	NA	NA	NA	NA	NA	NA	NA
TCGA-D7-6525	M	58	diffuse	III	NA	Cardia	NA	NA	MSI-L	WHITE	G3	1	13.5333	1	5.7	TCGA	Distant Metastasis	NA	NA	Nonsense_Mutation	NA	NA	Missense_Mutation	NA	NA	NA	NA	NA
TCGA-D7-6526	F	67	intestinal	III	NA	Body	NA	NA	MSS	WHITE	G2	0	17.4333	0	17.4333	TCGA	NA	NA	NA	Nonsense_Mutation	NA	NA	NA	NA	NA	NA	NA	NA
TCGA-D7-6527	M	62	intestinal	II	NA	Cardia	NA	NA	MSI-L	WHITE	G2	1	10.4	1	2.5	TCGA	Distant Metastasis	NA	NA	Frame_Shift_Del	NA	NA	NA	NA	NA	NA	NA	NA
TCGA-D7-6528	F	70	intestinal	I	NA	Body	NA	NA	MSI-L	WHITE	G2	0	15.4333	0	15.4333	TCGA	NA	Frame_Shift_Ins	NA	Missense_Mutation	NA	NA	Missense_Mutation	NA	NA	NA	Frame_Shift_Del	NA
TCGA-D7-6815	F	70	intestinal	II	NA	Body	NA	negative	MSS	WHITE	G2	0	16.2	0	16.2	TCGA	NA	NA	Missense_Mutation	Missense_Mutation	Frame_Shift_Ins;Missense_Mutation	NA	NA	NA	NA	Missense_Mutation	NA	NA
TCGA-D7-6817	M	63	intestinal	III	NA	Body	NA	negative	MSS	WHITE	G3	0	12.9667	0	12.9667	TCGA	NA	NA	NA	Missense_Mutation	NA	NA	NA	NA	NA	NA	NA	NA
TCGA-D7-6818	M	53	diffuse	III	NA	Body	NA	negative	MSS	WHITE	G3	1	12.5333	1	8.23333	TCGA	Locoregional Recurrence	NA	NA	Frame_Shift_Del	NA	NA	NA	NA	NA	NA	NA	NA
TCGA-D7-6820	M	64	intestinal	II	NA	Body	NA	positive	MSS	WHITE	G2	0	11.4667	0	11.4667	TCGA	NA	NA	NA	Missense_Mutation	NA	NA	NA	NA	NA	NA	NA	NA
TCGA-D7-6822	M	77	intestinal	I	NA	Body	NA	negative	MSS	WHITE	G2	0	12.5	0	12.5	TCGA	NA	NA	NA	Frame_Shift_Del	NA	NA	NA	NA	NA	NA	NA	NA
TCGA-D7-8570	M	44	intestinal	III	NA	Cardia	NA	negative	MSS	WHITE	G3	0	25.0667	0	25.0667	TCGA	NA	NA	NA	NA	NA	NA	NA	NA	NA	NA	NA	NA
TCGA-D7-8572	M	57	NA	II	NA	Body	NA	negative	MSS	WHITE	G2	0	17.0333	0	17.0333	TCGA	NA	NA	NA	NA	NA	NA	NA	NA	NA	NA	Splice_Site	NA
TCGA-D7-8573	M	57	intestinal	II	NA	Body	NA	negative	MSI-L	WHITE	G3	0	19.7667	0	19.7667	TCGA	NA	NA	NA	NA	NA	NA	NA	Missense_Mutation	NA	NA	NA	NA
TCGA-D7-8574	M	72	NA	III	NA	Antrum	NA	negative	MSS	WHITE	G3	0	17.4333	0	17.4333	TCGA	NA	NA	NA	NA	NA	NA	NA	NA	NA	NA	NA	NA
TCGA-D7-8575	M	75	intestinal	III	NA	Body	NA	negative	MSS	WHITE	G3	1	18.4667	1	14.2333	TCGA	Distant Metastasis	NA	NA	NA	NA	NA	NA	Frame_Shift_Ins	NA	NA	NA	NA
TCGA-D7-8576	F	54	intestinal	III	NA	Antrum	NA	negative	MSS	WHITE	G3	1	14.8667	1	6.8	TCGA	Locoregional Recurrence|Distant Metastasis	NA	NA	Missense_Mutation	NA	NA	NA	NA	NA	NA	NA	NA
TCGA-D7-8578	M	72	NA	I	NA	Antrum	NA	negative	MSS	WHITE	G2	0	21.4333	1	15.0333	TCGA	Locoregional Recurrence|Distant Metastasis	NA	NA	Missense_Mutation	NA	NA	NA	NA	NA	NA	NA	NA
TCGA-D7-8579	F	66	intestinal	II	NA	Antrum	NA	negative	MSS	WHITE	G2	0	21.2	0	21.2	TCGA	NA	NA	NA	NA	NA	NA	NA	NA	NA	NA	NA	NA
TCGA-D7-A4YT	M	56	intestinal	III	NA	Cardia	NA	negative	MSS	WHITE	G2	0	14.4667	0	14.4667	TCGA	NA	NA	NA	NA	NA	Missense_Mutation	NA	NA	NA	NA	NA	NA
TCGA-D7-A4YU	M	73	intestinal	III	NA	Body	NA	negative	MSS	WHITE	G3	0	16.6667	0	16.6667	TCGA	NA	NA	NA	Nonsense_Mutation	NA	NA	Splice_Site	NA	NA	NA	NA	NA
TCGA-D7-A4YV	F	69	intestinal	II	NA	Antrum	NA	negative	MSI-H	WHITE	G3	1	6	0	6	TCGA	NA	Missense_Mutation	NA	3'UTR	NA	NA	NA	NA	NA	Missense_Mutation	NA	NA
TCGA-D7-A4YX	M	63	NA	II	NA	Body	NA	negative	MSS	WHITE	G3	0	36.9333	0	36.9333	TCGA	NA	NA	NA	NA	NA	NA	NA	NA	NA	Missense_Mutation	NA	NA
TCGA-D7-A4YY	M	61	NA	III	NA	Antrum	NA	negative	MSI-H	WHITE	G3	0	13.9667	0	13.9667	TCGA	NA	NA	NA	NA	NA	NA	Missense_Mutation;Nonsense_Mutation	NA	NA	NA	NA	NA
TCGA-D7-A4Z0	F	60	intestinal	II	NA	Antrum	NA	negative	MSS	WHITE	G3	0	14.9667	0	14.9667	TCGA	NA	NA	NA	NA	NA	NA	NA	NA	NA	NA	NA	NA
TCGA-D7-A6ET	M	76	intestinal	III	NA	Body	NA	negative	MSS	WHITE	G2	0	26.8	1	25.9	TCGA	Locoregional Recurrence	NA	NA	NA	NA	NA	NA	NA	NA	NA	NA	NA
TCGA-D7-A6EV	F	71	NA	II	NA	Antrum	NA	negative	MSI-L	WHITE	G3	0	11.4	0	11.4	TCGA	NA	NA	NA	Missense_Mutation	Missense_Mutation	NA	Missense_Mutation	NA	NA	NA	NA	NA
TCGA-D7-A6EX	F	72	intestinal	III	NA	Antrum	NA	negative	MSS	WHITE	G3	0	11.4667	0	11.4667	TCGA	NA	NA	NA	Missense_Mutation	NA	NA	NA	NA	NA	NA	NA	NA
TCGA-D7-A6EY	F	72	intestinal	III	NA	Antrum	NA	negative	MSI-H	WHITE	G3	1	11.6	1	11.6	TCGA	NA	Nonsense_Mutation	NA	NA	NA	NA	Missense_Mutation	NA	NA	NA	NA	NA
TCGA-D7-A6EZ	M	66	intestinal	III	NA	Body	NA	negative	MSS	WHITE	G3	1	20.6	1	20.6	TCGA	NA	NA	NA	NA	NA	NA	NA	NA	NA	Missense_Mutation	NA	NA
TCGA-D7-A6F0	F	79	intestinal	I	NA	Cardia	NA	negative	MSS	WHITE	G3	0	22.6	0	22.6	TCGA	NA	NA	NA	Missense_Mutation	NA	Missense_Mutation	NA	NA	NA	NA	NA	NA
TCGA-D7-A6F2	M	62	intestinal	I	NA	Body	NA	NA	MSS	WHITE	G3	0	15.8667	0	15.8667	TCGA	NA	NA	NA	Missense_Mutation	NA	NA	Missense_Mutation	NA	NA	NA	NA	NA
TCGA-D7-A747	M	57	diffuse	II	NA	Antrum	NA	NA	MSS	WHITE	G3	1	8.5	1	8.5	TCGA	NA	NA	NA	NA	NA	NA	Missense_Mutation	NA	NA	Missense_Mutation	NA	NA
TCGA-D7-A748	F	41	diffuse	IV	NA	Body	NA	NA	MSS	WHITE	G3	1	4.4	1	3.3	TCGA	Locoregional Recurrence|Distant Metastasis	NA	NA	NA	NA	NA	NA	NA	NA	NA	NA	NA
TCGA-D7-A74A	F	61	intestinal	III	NA	Cardia	NA	negative	MSS	WHITE	G2	0	20.2333	0	20.2333	TCGA	NA	NA	Missense_Mutation	NA	NA	NA	NA	NA	NA	NA	NA	NA
TCGA-D7-A74B	F	52	diffuse	III	NA	Body	NA	negative	MSS	WHITE	G3	1	7.23333	1	5.8	TCGA	Locoregional Recurrence	NA	NA	Frame_Shift_Del	NA	NA	NA	NA	NA	NA	NA	NA
TCGA-EQ-5647	F	86	NA	IV	NA	Antrum	NA	negative	MSS	WHITE	G2	1	0.633333	1	0.633333	TCGA	NA	NA	NA	NA	NA	NA	NA	NA	NA	NA	NA	NA
TCGA-EQ-8122	F	71	intestinal	II	NA	Antrum	NA	NA	MSS	WHITE	G3	1	8.1	0	8.1	TCGA	NA	NA	NA	Frame_Shift_Del	NA	NA	NA	NA	NA	NA	NA	NA
TCGA-EQ-A4SO	M	70	NA	III	NA	Antrum	NA	negative	MSI-L	WHITE	G2	0	16.4667	0	16.4667	TCGA	NA	NA	Missense_Mutation;Missense_Mutation	NA	NA	NA	NA	NA	NA	NA	NA	NA
TCGA-F1-6177	M	90	NA	I	NA	Antrum	NA	negative	MSI-H	BLACK OR AFRICAN AMERICAN	G2	0	6.66667	0	6.66667	TCGA	NA	NA	NA	NA	NA	NA	Missense_Mutation	NA	NA	Missense_Mutation;Missense_Mutation	Frame_Shift_Del	NA
TCGA-F1-6874	M	79	intestinal	I	NA	Cardia	NA	negative	MSI-H	WHITE	G3	0	14.6667	0	14.6667	TCGA	NA	NA	NA	Missense_Mutation	NA	NA	NA	NA	NA	NA	NA	NA
TCGA-F1-6875	M	79	NA	I	NA	Antrum	NA	NA	MSS	BLACK OR AFRICAN AMERICAN	G2	1	73.2333	0	73.2333	TCGA	NA	Nonsense_Mutation	NA	Splice_Site	NA	NA	NA	NA	NA	NA	NA	NA
TCGA-F1-A448	M	70	intestinal	III	NA	Antrum	NA	negative	MSI-H	WHITE	G3	0	21.5667	0	21.5667	TCGA	NA	NA	NA	NA	NA	Missense_Mutation	NA	NA	Missense_Mutation	NA	NA	NA
TCGA-F1-A72C	M	68	intestinal	II	NA	Antrum	NA	negative	MSS	ASIAN	G2	0	11.5333	1	11.4333	TCGA	Distant Metastasis	NA	NA	Missense_Mutation	Missense_Mutation	NA	NA	NA	NA	NA	NA	NA
TCGA-FP-7735	M	77	NA	I	NA	Body	NA	NA	MSS	BLACK OR AFRICAN AMERICAN	G2	1	3.53333	0	3.53333	TCGA	NA	Frame_Shift_Del;Frame_Shift_Del	NA	Missense_Mutation;Missense_Mutation	NA	NA	NA	NA	NA	NA	NA	NA
TCGA-FP-7829	M	69	intestinal	II	NA	Gastroesophageal Junction	NA	NA	MSS	WHITE	G2	0	19.8	0	19.8	TCGA	NA	NA	NA	Missense_Mutation;Missense_Mutation	Missense_Mutation;Missense_Mutation	NA	Missense_Mutation;Missense_Mutation	NA	NA	NA	NA	NA
TCGA-FP-7916	M	77	diffuse	III	NA	Antrum	NA	NA	MSS	ASIAN	G3	1	14.2667	1	14.2667	TCGA	NA	NA	NA	NA	NA	NA	NA	NA	NA	Missense_Mutation	NA	NA
TCGA-FP-7998	M	77	diffuse	III	NA	Body	NA	NA	MSS	WHITE	G3	0	22.6	0	22.6	TCGA	NA	NA	NA	NA	NA	NA	NA	NA	NA	Missense_Mutation	NA	NA
TCGA-FP-8099	M	79	NA	II	NA	Gastroesophageal Junction	NA	NA	MSS	WHITE	G2	0	17.3	0	17.3	TCGA	NA	NA	NA	Missense_Mutation	NA	NA	NA	NA	NA	NA	NA	NA
TCGA-FP-8209	M	49	diffuse	I	NA	Antrum	NA	NA	MSS	WHITE	G3	1	60.3667	1	55.8667	TCGA	Distant Metastasis	NA	NA	NA	NA	NA	NA	NA	NA	NA	NA	NA
TCGA-FP-8210	M	48	diffuse	III	NA	Antrum	NA	NA	MSS	ASIAN	G3	1	5.1	1	5.1	TCGA	NA	NA	NA	NA	NA	NA	NA	NA	NA	NA	NA	NA
TCGA-FP-8211	M	62	NA	II	NA	Cardia	NA	NA	MSS	WHITE	G2	0	13.7667	0	13.7667	TCGA	NA	Frame_Shift_Del	NA	NA	NA	NA	NA	NA	NA	NA	NA	NA
TCGA-FP-8631	M	68	intestinal	III	NA	Gastroesophageal Junction	NA	NA	MSS	WHITE	G2	0	0.566667	0	0.566667	TCGA	NA	NA	NA	Missense_Mutation	NA	NA	NA	NA	NA	NA	NA	NA
TCGA-FP-A4BE	M	55	NA	II	NA	Body	NA	NA	MSI-H	BLACK OR AFRICAN AMERICAN	G3	0	11.2333	0	11.2333	TCGA	NA	NA	NA	Missense_Mutation;Missense_Mutation	NA	NA	Missense_Mutation	NA	NA	NA	NA	NA
TCGA-FP-A4BF	M	68	NA	III	NA	Gastroesophageal Junction	NA	NA	MSS	WHITE	G3	1	5.6	1	5.3	TCGA	Distant Metastasis	NA	NA	Missense_Mutation	NA	NA	NA	NA	NA	NA	NA	NA
TCGA-FP-A8CX	M	60	NA	III	NA	Body	NA	negative	MSS	WHITE	G3	0	0.233333	0	0.233333	TCGA	NA	NA	NA	NA	NA	NA	NA	NA	NA	NA	NA	NA
TCGA-FP-A9TM	M	77	NA	NA	NA	Gastroesophageal Junction	NA	negative	MSS	WHITE	G2	0	6.3	0	6.3	TCGA	NA	NA	NA	Missense_Mutation	NA	NA	Missense_Mutation	NA	NA	NA	NA	NA
TCGA-HF-7131	F	NA	NA	I	NA	Gastroesophageal Junction	NA	NA	MSS	NA	G2	0	NA	0	NA	TCGA	NA	NA	NA	NA	NA	NA	NA	NA	NA	NA	NA	NA
TCGA-HF-7132	M	NA	intestinal	II	NA	Antrum	NA	NA	MSI-H	NA	G2	0	78.3667	0	78.3667	TCGA	NA	NA	NA	Splice_Site	NA	NA	Missense_Mutation;Frame_Shift_Del	NA	NA	Missense_Mutation	NA	NA
TCGA-HF-7133	F	NA	intestinal	IV	NA	Gastroesophageal Junction	NA	negative	MSS	NA	G2	0	63.9333	0	63.9333	TCGA	NA	NA	NA	NA	NA	NA	NA	NA	NA	NA	NA	NA
TCGA-HF-7134	M	NA	intestinal	I	NA	Body	NA	negative	MSI-L	NA	G2	0	52.9333	0	52.9333	TCGA	NA	NA	NA	NA	NA	NA	Splice_Site	NA	NA	NA	NA	NA
TCGA-HF-7136	M	NA	NA	III	NA	Gastroesophageal Junction	NA	NA	MSS	NA	G2	0	NA	0	NA	TCGA	Distant Metastasis	NA	NA	NA	NA	NA	NA	NA	NA	NA	NA	NA
TCGA-HF-A5NB	F	75	intestinal	III	NA	Antrum	NA	negative	MSI-H	NA	G3	0	30.9333	0	30.9333	TCGA	NA	NA	Missense_Mutation	NA	NA	NA	Missense_Mutation	Nonsense_Mutation	NA	Missense_Mutation	NA	NA
TCGA-HJ-7597	F	71	NA	I	NA	Body	NA	negative	MSI-H	WHITE	G3	1	26.8333	1	7.7	TCGA	Distant Metastasis	NA	NA	Frame_Shift_Del	NA	NA	NA	NA	NA	NA	NA	NA
TCGA-HU-8238	M	56	intestinal	NA	NA	Antrum	NA	NA	MSS	ASIAN	G2	0	1.53333	0	1.53333	TCGA	NA	NA	NA	Splice_Site	NA	Missense_Mutation	NA	NA	NA	Missense_Mutation	NA	NA
TCGA-HU-8243	M	66	intestinal	III	NA	Body	NA	negative	MSS	ASIAN	G2	1	6	1	4.4	TCGA	Distant Metastasis	Missense_Mutation	NA	Missense_Mutation	Missense_Mutation	NA	NA	NA	NA	NA	NA	NA
TCGA-HU-8244	F	77	intestinal	I	NA	Body	NA	negative	MSI-L	ASIAN	G1	0	24.7333	0	24.7333	TCGA	NA	NA	NA	Missense_Mutation	NA	NA	NA	NA	NA	NA	NA	NA
TCGA-HU-8245	M	72	intestinal	II	NA	Body	NA	negative	MSS	ASIAN	G3	0	18.4	0	18.4	TCGA	NA	Frame_Shift_Del	NA	Frame_Shift_Del	NA	NA	NA	NA	NA	NA	NA	NA
TCGA-HU-8249	M	76	intestinal	III	NA	Body	NA	negative	MSS	ASIAN	G2	0	29.3667	0	29.3667	TCGA	NA	NA	NA	NA	NA	NA	NA	Frame_Shift_Del	NA	NA	NA	NA
TCGA-HU-8602	F	58	diffuse	II	NA	Antrum	NA	negative	MSI-H	ASIAN	G3	0	22.6333	0	22.6333	TCGA	NA	NA	NA	NA	NA	NA	Missense_Mutation;Missense_Mutation	NA	NA	Missense_Mutation;Missense_Mutation	NA	NA
TCGA-HU-8604	F	82	intestinal	II	NA	Antrum	NA	negative	MSS	ASIAN	G2	0	23.1333	0	23.1333	TCGA	NA	Frame_Shift_Ins;Frame_Shift_Ins	NA	Frame_Shift_Del;Frame_Shift_Del	NA	NA	Nonsense_Mutation;Missense_Mutation;Missense_Mutation;Nonsense_Mutation;Missense_Mutation;Missense_Mutation	NA	NA	NA	NA	NA
TCGA-HU-8608	M	70	diffuse	III	NA	Body	NA	negative	MSS	ASIAN	G3	0	21.3667	1	9.23333	TCGA	NA	NA	NA	NA	NA	NA	NA	NA	NA	Missense_Mutation;Missense_Mutation;Missense_Mutation;Missense_Mutation	NA	NA
TCGA-HU-8610	M	75	intestinal	I	NA	Body	NA	negative	MSS	ASIAN	G2	0	0.766667	0	0.766667	TCGA	NA	NA	NA	NA	NA	NA	NA	NA	NA	NA	NA	NA
TCGA-HU-A4G2	M	45	diffuse	II	NA	Antrum	NA	positive	MSS	ASIAN	G3	0	24.6333	0	24.6333	TCGA	NA	NA	NA	NA	Missense_Mutation	NA	NA	NA	NA	Missense_Mutation	NA	NA
TCGA-HU-A4G3	M	54	intestinal	II	NA	Antrum	NA	negative	MSS	ASIAN	G2	0	5.66667	0	5.66667	TCGA	NA	NA	NA	NA	NA	NA	NA	NA	NA	NA	NA	NA
TCGA-HU-A4G6	M	74	intestinal	I	NA	Cardia	NA	negative	MSS	ASIAN	G3	0	24.6	0	24.6	TCGA	NA	NA	NA	NA	NA	Missense_Mutation	NA	NA	NA	NA	NA	NA
TCGA-HU-A4G8	F	71	diffuse	II	NA	Antrum	NA	negative	MSI-H	ASIAN	G3	0	23	0	23	TCGA	NA	NA	NA	NA	NA	NA	NA	NA	NA	NA	NA	NA
TCGA-HU-A4G9	F	67	intestinal	I	NA	Body	NA	negative	MSI-H	ASIAN	G2	0	24.5333	0	24.5333	TCGA	NA	NA	NA	NA	NA	Frame_Shift_Del;Frame_Shift_Del	NA	NA	Missense_Mutation;Missense_Mutation	NA	NA	NA
TCGA-HU-A4GC	M	74	diffuse	III	NA	Antrum	NA	negative	MSI-L	ASIAN	G3	0	3.3	0	3.3	TCGA	NA	NA	NA	Splice_Site;Splice_Site	NA	NA	Missense_Mutation;Missense_Mutation	NA	NA	NA	NA	NA
TCGA-HU-A4GD	M	56	intestinal	II	NA	Antrum	NA	negative	MSS	ASIAN	G3	0	23.0667	1	13.3	TCGA	Distant Metastasis	NA	NA	Missense_Mutation	NA	NA	NA	NA	NA	NA	NA	NA
TCGA-HU-A4GF	M	69	intestinal	II	NA	Antrum	NA	NA	MSS	ASIAN	G2	0	26.1667	0	26.1667	TCGA	NA	NA	NA	Missense_Mutation	NA	NA	NA	NA	NA	NA	NA	NA
TCGA-HU-A4GH	M	75	intestinal	I	NA	Body	NA	negative	MSS	ASIAN	G2	0	11.9333	0	11.9333	TCGA	NA	NA	NA	Missense_Mutation;Missense_Mutation	NA	Missense_Mutation;Missense_Mutation	NA	NA	NA	NA	NA	NA
TCGA-HU-A4GJ	F	60	diffuse	III	NA	Antrum	NA	negative	MSS	ASIAN	G3	0	21.6667	1	18.2333	TCGA	Distant Metastasis	NA	NA	NA	NA	NA	NA	NA	NA	NA	NA	NA
TCGA-HU-A4GN	M	61	intestinal	II	NA	Antrum	NA	negative	MSI-H	ASIAN	G2	0	30.4	1	5.6	TCGA	NA	NA	NA	Missense_Mutation;Missense_Mutation	NA	NA	Missense_Mutation;Nonsense_Mutation;Missense_Mutation;Nonsense_Mutation	NA	NA	NA	Missense_Mutation;Frame_Shift_Ins;Missense_Mutation;Frame_Shift_Ins	Frame_Shift_Del;Frame_Shift_Del
TCGA-HU-A4GP	F	62	diffuse	II	NA	Antrum	NA	NA	MSI-L	ASIAN	G2	0	9.1	0	9.1	TCGA	NA	NA	NA	Missense_Mutation;Missense_Mutation	NA	Missense_Mutation;Missense_Mutation	NA	NA	NA	NA	NA	NA
TCGA-HU-A4GQ	M	71	intestinal	III	NA	Antrum	NA	NA	MSI-H	ASIAN	G2	1	0.1	0	0.1	TCGA	NA	NA	NA	Missense_Mutation	NA	NA	Missense_Mutation	NA	NA	Missense_Mutation;Missense_Mutation	NA	NA
TCGA-HU-A4GT	F	71	intestinal	II	NA	Antrum	NA	NA	MSI-H	ASIAN	G3	0	6.6	0	6.6	TCGA	NA	NA	NA	NA	NA	NA	NA	Frame_Shift_Del	NA	NA	NA	Missense_Mutation;Intron
TCGA-HU-A4GU	M	73	diffuse	II	NA	Antrum	NA	negative	MSI-H	ASIAN	G3	0	6.66667	0	6.66667	TCGA	NA	Frame_Shift_Ins	NA	In_Frame_Del	NA	NA	Nonsense_Mutation;Missense_Mutation;Missense_Mutation	NA	NA	Missense_Mutation	Nonsense_Mutation	NA
TCGA-HU-A4GX	F	70	diffuse	III	NA	Antrum	NA	negative	MSI-H	ASIAN	G3	0	20.5333	0	20.5333	TCGA	NA	NA	NA	Missense_Mutation;Missense_Mutation	NA	NA	Frame_Shift_Del;Frame_Shift_Del	Frame_Shift_Del;Frame_Shift_Del	NA	Missense_Mutation;Missense_Mutation	NA	NA
TCGA-HU-A4GY	F	76	diffuse	III	NA	Antrum	NA	NA	MSS	ASIAN	G3	0	0.266667	0	0.266667	TCGA	NA	NA	NA	NA	NA	NA	NA	NA	NA	NA	NA	NA
TCGA-HU-A4H0	M	72	diffuse	III	NA	Body	NA	negative	MSS	ASIAN	G3	0	2.13333	0	2.13333	TCGA	NA	NA	NA	NA	NA	NA	NA	NA	NA	Missense_Mutation	NA	NA
TCGA-HU-A4H2	F	58	intestinal	III	NA	Antrum	NA	negative	MSS	ASIAN	G2	0	13.1333	0	13.1333	TCGA	NA	NA	NA	Frame_Shift_Del	NA	NA	NA	NA	NA	NA	NA	NA
TCGA-HU-A4H3	F	56	diffuse	III	NA	Body	NA	negative	MSI-H	ASIAN	G3	0	29.4	1	13.6667	TCGA	Distant Metastasis	Missense_Mutation	NA	Frame_Shift_Del	NA	Missense_Mutation	Missense_Mutation	NA	NA	Missense_Mutation	NA	NA
TCGA-HU-A4H4	F	53	intestinal	II	NA	Antrum	NA	negative	MSI-H	ASIAN	G3	0	24.1667	0	24.1667	TCGA	NA	NA	NA	Missense_Mutation	Missense_Mutation	NA	Missense_Mutation;Missense_Mutation	NA	NA	Missense_Mutation	NA	NA
TCGA-HU-A4H5	M	71	intestinal	I	NA	Body	NA	negative	MSS	ASIAN	GX	0	24.1333	0	24.1333	TCGA	NA	NA	NA	NA	NA	Missense_Mutation	NA	NA	NA	NA	NA	NA
TCGA-HU-A4H6	F	72	intestinal	III	NA	Antrum	NA	negative	MSS	ASIAN	G2	0	21.4667	0	21.4667	TCGA	NA	NA	NA	NA	NA	NA	NA	NA	NA	NA	NA	NA
TCGA-HU-A4H8	M	77	intestinal	I	NA	Antrum	NA	negative	MSI-H	ASIAN	G2	0	14.2667	1	11.8	TCGA	Distant Metastasis	NA	NA	NA	NA	NA	Frame_Shift_Ins	NA	3'UTR	NA	NA	NA
TCGA-HU-A4HB	M	68	diffuse	II	NA	Antrum	NA	negative	MSS	ASIAN	G3	1	15.9	1	13	TCGA	Distant Metastasis	NA	NA	NA	NA	NA	NA	NA	NA	NA	NA	NA
TCGA-HU-A4HD	M	73	intestinal	III	NA	Antrum	NA	negative	MSI-L	ASIAN	G2	0	33.8667	0	33.8667	TCGA	NA	NA	NA	Frame_Shift_Ins	NA	NA	NA	NA	NA	NA	NA	NA
TCGA-IN-7806	M	50	diffuse	II	NA	Gastroesophageal Junction	NA	negative	MSS	WHITE	G3	0	36.8667	0	36.8667	TCGA	NA	NA	NA	Missense_Mutation;Missense_Mutation	NA	NA	NA	NA	NA	NA	NA	NA
TCGA-IN-7808	M	59	diffuse	NA	NA	Gastroesophageal Junction	NA	negative	MSS	WHITE	G3	1	3.5	1	3.5	TCGA	Distant Metastasis	NA	NA	Missense_Mutation;Missense_Mutation	NA	NA	NA	NA	NA	NA	NA	NA
TCGA-IN-8462	M	80	NA	II	NA	Gastroesophageal Junction	NA	negative	MSI-L	WHITE	G2	0	19.0667	1	9	TCGA	Distant Metastasis	NA	NA	Frame_Shift_Ins	Missense_Mutation	NA	NA	NA	NA	NA	NA	NA
TCGA-IN-8663	M	68	NA	II	NA	Gastroesophageal Junction	NA	NA	MSI-L	WHITE	G3	1	3.43333	0	3.43333	TCGA	NA	NA	NA	NA	NA	NA	NA	NA	NA	NA	NA	NA
TCGA-IN-A6RI	M	45	NA	I	NA	Gastroesophageal Junction	NA	NA	MSS	WHITE	G2	0	18.6333	0	18.6333	TCGA	NA	NA	NA	Missense_Mutation	NA	NA	NA	NA	NA	NA	NA	NA
TCGA-IN-A6RJ	M	64	NA	I	NA	Gastroesophageal Junction	NA	negative	MSS	WHITE	G3	0	12.6333	0	12.6333	TCGA	NA	NA	NA	NA	NA	NA	Nonsense_Mutation	NA	NA	NA	NA	NA
TCGA-IN-A6RL	M	84	NA	NA	NA	Gastroesophageal Junction	NA	NA	MSS	WHITE	G2	1	13.5333	1	10.2333	TCGA	Distant Metastasis	NA	NA	Missense_Mutation	NA	NA	Nonsense_Mutation	NA	NA	NA	NA	Missense_Mutation
TCGA-IN-A6RN	F	72	NA	II	NA	Gastroesophageal Junction	NA	NA	MSS	WHITE	G2	0	19.8	0	19.8	TCGA	NA	NA	NA	NA	NA	NA	NA	NA	NA	NA	NA	NA
TCGA-IN-A6RO	M	70	NA	I	NA	Gastroesophageal Junction	NA	NA	MSI-L	ASIAN	G2	1	NA	1	5.13333	TCGA	Distant Metastasis	NA	NA	NA	NA	Missense_Mutation	Missense_Mutation;Missense_Mutation	NA	NA	NA	NA	NA
TCGA-IN-A6RP	M	63	NA	NA	NA	Gastroesophageal Junction	NA	NA	MSS	WHITE	G3	0	6.53333	1	5	TCGA	NA	Frame_Shift_Ins	NA	Missense_Mutation	NA	NA	NA	NA	NA	NA	NA	NA
TCGA-IN-A6RR	M	84	NA	NA	NA	Gastroesophageal Junction	NA	NA	MSS	WHITE	G3	1	6.83333	0	6.83333	TCGA	NA	NA	NA	Frame_Shift_Del	NA	NA	NA	NA	NA	NA	NA	NA
TCGA-IN-A6RS	M	76	NA	I	NA	Gastroesophageal Junction	NA	NA	MSS	WHITE	G2	0	12.7667	0	12.7667	TCGA	NA	NA	NA	Missense_Mutation	NA	NA	NA	NA	NA	NA	NA	NA
TCGA-IN-A7NR	F	64	NA	IV	NA	Gastroesophageal Junction	NA	NA	MSS	WHITE	G3	0	6.6	0	6.6	TCGA	NA	NA	NA	Missense_Mutation	NA	NA	Splice_Site	NA	NA	NA	NA	NA
TCGA-IN-A7NT	F	73	NA	II	NA	Gastroesophageal Junction	NA	NA	MSI-L	WHITE	G3	0	10.7667	0	10.7667	TCGA	NA	NA	NA	Missense_Mutation	NA	NA	Missense_Mutation	NA	NA	NA	NA	NA
TCGA-IN-A7NU	M	69	NA	III	NA	Gastroesophageal Junction	NA	NA	MSS	WHITE	G3	0	11.8667	1	11.2333	TCGA	Distant Metastasis	NA	NA	Missense_Mutation	NA	NA	Missense_Mutation	NA	NA	NA	NA	NA
TCGA-IN-AB1V	M	63	NA	I	NA	Gastroesophageal Junction	NA	NA	MSS	WHITE	G2	0	15.9667	0	15.9667	TCGA	NA	NA	NA	NA	NA	NA	NA	NA	NA	NA	NA	NA
TCGA-IN-AB1X	F	78	NA	II	NA	Gastroesophageal Junction	NA	NA	MSI-L	WHITE	G3	0	13.7	0	13.7	TCGA	NA	NA	NA	NA	NA	Missense_Mutation;Missense_Mutation	NA	NA	NA	NA	NA	NA
TCGA-IP-7968	M	74	NA	III	NA	Gastroesophageal Junction	NA	NA	MSS	WHITE	G2	0	2.56667	0	2.56667	TCGA	NA	NA	NA	Nonsense_Mutation;Nonsense_Mutation	NA	NA	NA	NA	NA	NA	NA	NA
TCGA-KB-A6F5	M	73	intestinal	III	NA	Gastroesophageal Junction	NA	negative	MSS	NA	G3	0	5.63333	0	5.63333	TCGA	NA	NA	NA	Missense_Mutation	NA	NA	NA	NA	NA	NA	NA	NA
TCGA-KB-A6F7	F	54	intestinal	I	NA	Body	NA	NA	MSS	NA	G3	0	64.5	0	64.5	TCGA	NA	NA	NA	NA	Missense_Mutation	NA	NA	NA	NA	NA	NA	NA
TCGA-KB-A93G	M	68	NA	I	NA	Gastroesophageal Junction	NA	negative	MSS	WHITE	G1	0	20.4333	0	20.4333	TCGA	NA	Missense_Mutation	NA	Missense_Mutation	NA	NA	NA	NA	NA	NA	NA	NA
TCGA-KB-A93H	F	79	intestinal	II	NA	Body	NA	negative	MSS	ASIAN	G1	0	38.1667	0	38.1667	TCGA	NA	NA	NA	Frame_Shift_Del	NA	NA	NA	NA	NA	NA	NA	NA
TCGA-KB-A93J	M	78	diffuse	II	NA	NA	NA	negative	MSS	WHITE	G3	0	37.4667	0	37.4667	TCGA	NA	NA	NA	Nonsense_Mutation	NA	NA	NA	NA	NA	NA	NA	NA
TCGA-MX-A5UG	M	78	diffuse	III	NA	Antrum	NA	positive	MSS	ASIAN	G3	1	3.76667	0	3.76667	TCGA	NA	NA	NA	NA	NA	NA	NA	NA	NA	NA	NA	NA
TCGA-MX-A5UJ	F	86	intestinal	III	NA	Antrum	NA	negative	MSI-H	WHITE	G3	0	20	0	20	TCGA	NA	NA	NA	NA	NA	NA	NA	NA	Missense_Mutation	NA	Intron	NA
TCGA-MX-A663	M	66	NA	II	NA	NA	NA	negative	MSS	WHITE	G3	1	10	1	7.26667	TCGA	Distant Metastasis	NA	NA	NA	NA	NA	Missense_Mutation	NA	NA	NA	NA	NA
TCGA-MX-A666	M	61	NA	II	NA	NA	NA	negative	MSS	WHITE	G2	0	14.2333	0	14.2333	TCGA	NA	Nonsense_Mutation	NA	Missense_Mutation	NA	NA	NA	NA	NA	NA	NA	NA
TCGA-R5-A7O7	M	51	intestinal	IV	NA	Gastroesophageal Junction	NA	negative	MSS	WHITE	G2	0	46.3	0	46.3	TCGA	NA	NA	NA	Missense_Mutation	NA	NA	NA	NA	NA	NA	NA	NA
TCGA-R5-A7ZE	F	66	intestinal	III	NA	Gastroesophageal Junction	NA	negative	MSS	WHITE	G2	1	18.4667	1	18.4667	TCGA	NA	NA	NA	Missense_Mutation	NA	NA	NA	NA	NA	NA	NA	NA
TCGA-R5-A7ZF	F	65	intestinal	IV	NA	Antrum	NA	negative	MSS	BLACK OR AFRICAN AMERICAN	G2	1	8.63333	1	8.63333	TCGA	NA	Nonsense_Mutation	NA	Nonsense_Mutation	Missense_Mutation	NA	NA	NA	NA	NA	NA	NA
TCGA-R5-A7ZI	F	44	diffuse	IV	NA	NA	NA	negative	MSI-H	WHITE	G3	0	75.5667	0	75.5667	TCGA	NA	NA	NA	NA	NA	NA	NA	Missense_Mutation;Missense_Mutation	NA	NA	Frame_Shift_Ins	NA
TCGA-R5-A7ZR	F	70	intestinal	III	NA	Body	NA	negative	MSS	BLACK OR AFRICAN AMERICAN	G2	1	6.16667	1	6.16667	TCGA	NA	NA	NA	NA	NA	NA	NA	NA	NA	NA	NA	NA
TCGA-R5-A804	M	54	diffuse	IV	NA	NA	NA	negative	MSI-L	BLACK OR AFRICAN AMERICAN	G3	1	4.66667	1	4.66667	TCGA	NA	NA	NA	NA	NA	NA	NA	NA	NA	NA	NA	NA
TCGA-R5-A805	M	71	intestinal	III	NA	Gastroesophageal Junction	NA	negative	MSI-L	WHITE	G3	1	9.36667	1	9.36667	TCGA	NA	NA	NA	NA	NA	Missense_Mutation	Missense_Mutation	NA	NA	NA	NA	NA
TCGA-RD-A7BS	M	46	diffuse	III	NA	Gastroesophageal Junction	NA	negative	MSS	WHITE	G3	1	11.2	1	8.13333	TCGA	NA	NA	NA	NA	NA	NA	NA	NA	NA	NA	NA	NA
TCGA-RD-A7BT	M	66	intestinal	IV	NA	Body	NA	positive	MSI-L	NATIVE HAWAIIAN OR OTHER PACIFIC ISLANDER	G3	1	8.73333	1	4.1	TCGA	Distant Metastasis	NA	NA	NA	NA	NA	Missense_Mutation	NA	NA	NA	NA	NA
TCGA-RD-A7BW	F	68	diffuse	I	NA	Body	NA	negative	MSS	WHITE	G3	1	5.2	0	5.2	TCGA	NA	NA	NA	NA	NA	NA	NA	NA	NA	NA	NA	NA
TCGA-RD-A7C1	M	82	diffuse	I	NA	Body	NA	negative	MSS	WHITE	G3	1	16.9	1	14.6	TCGA	Distant Metastasis	NA	NA	NA	NA	NA	NA	NA	NA	NA	NA	NA
TCGA-RD-A8MV	M	56	intestinal	III	NA	Body	NA	positive	MSS	WHITE	G3	0	124	0	124	TCGA	NA	NA	NA	NA	NA	NA	NA	Frame_Shift_Ins	NA	NA	NA	NA
TCGA-RD-A8MW	M	72	intestinal	III	NA	Antrum	NA	positive	MSS	WHITE	G3	1	38.4333	1	3.26667	TCGA	Distant Metastasis	NA	NA	Missense_Mutation	NA	NA	NA	NA	NA	NA	NA	NA
TCGA-RD-A8N0	F	53	diffuse	III	NA	Body	NA	positive	MSS	WHITE	G3	0	41.2	0	41.2	TCGA	NA	NA	NA	NA	NA	NA	NA	NA	NA	NA	NA	NA
TCGA-RD-A8N1	M	70	diffuse	III	NA	Antrum	NA	positive	MSS	WHITE	G3	0	117.3	0	117.3	TCGA	NA	NA	NA	Missense_Mutation	NA	Missense_Mutation	NA	NA	NA	NA	NA	NA
TCGA-RD-A8N2	F	59	diffuse	I	NA	Antrum	NA	positive	MSS	WHITE	G3	0	118	0	118	TCGA	NA	NA	NA	NA	NA	NA	NA	NA	NA	NA	NA	NA
TCGA-RD-A8N4	F	58	diffuse	III	NA	Antrum	NA	negative	MSS	WHITE	G3	0	72.3667	0	72.3667	TCGA	NA	NA	NA	NA	NA	NA	NA	NA	NA	NA	NA	NA
TCGA-RD-A8N5	M	78	intestinal	III	NA	Body	NA	positive	MSS	WHITE	G2	1	58.2333	0	58.2333	TCGA	NA	NA	NA	NA	NA	NA	NA	NA	NA	NA	NA	NA
TCGA-RD-A8N6	F	78	intestinal	III	NA	Antrum	NA	negative	MSS	WHITE	G3	1	9.06667	1	5.43333	TCGA	NA	NA	NA	Splice_Site	NA	NA	NA	NA	NA	NA	NA	NA
TCGA-RD-A8N9	F	63	diffuse	II	NA	Gastroesophageal Junction	NA	negative	MSS	ASIAN	G3	0	36.1	0	36.1	TCGA	NA	NA	NA	Frame_Shift_Del	NA	Missense_Mutation	NA	NA	NA	NA	NA	NA
TCGA-RD-A8NB	F	80	diffuse	III	NA	Antrum	NA	positive	MSI-H	WHITE	G3	1	17.1	1	7.66667	TCGA	NA	NA	NA	Nonsense_Mutation	NA	NA	NA	Missense_Mutation	NA	Missense_Mutation	NA	NA
TCGA-SW-A7EA	F	61	diffuse	I	NA	Antrum	NA	negative	MSI-H	WHITE	GX	0	19.3	0	19.3	TCGA	NA	NA	Missense_Mutation	NA	NA	NA	Frame_Shift_Ins;Missense_Mutation	NA	NA	NA	NA	NA
TCGA-SW-A7EB	M	45	intestinal	III	NA	Antrum	NA	NA	MSS	WHITE	G2	0	5.86667	0	5.86667	TCGA	NA	NA	NA	Nonsense_Mutation	NA	NA	NA	NA	NA	NA	NA	NA
TCGA-VQ-A8DL	F	69	intestinal	II	NA	Cardia	NA	negative	MSS	WHITE	G2	1	0.933333	0	0.933333	TCGA	NA	NA	NA	Frame_Shift_Del	NA	NA	NA	NA	NA	NA	NA	NA
TCGA-VQ-A8DT	M	43	intestinal	III	NA	Body	NA	negative	MSS	NA	G3	0	49.4667	1	45.8667	TCGA	Distant Metastasis	NA	NA	Nonsense_Mutation	NA	NA	NA	NA	NA	NA	NA	NA
TCGA-VQ-A8DU	M	63	intestinal	III	NA	Antrum	NA	negative	MSS	WHITE	G2	1	5.53333	1	5.26667	TCGA	NA	NA	NA	Missense_Mutation	NA	NA	NA	NA	NA	NA	NA	NA
TCGA-VQ-A8DV	M	48	intestinal	I	NA	Antrum	NA	negative	MSS	WHITE	G2	1	13.4333	1	9.6	TCGA	NA	Missense_Mutation	NA	Frame_Shift_Ins	NA	NA	NA	NA	NA	NA	NA	NA
TCGA-VQ-A8DZ	M	70	NA	IV	NA	Antrum	NA	negative	MSS	BLACK OR AFRICAN AMERICAN	G3	1	13.2	1	13.2	TCGA	NA	NA	NA	Missense_Mutation	NA	NA	NA	NA	NA	NA	NA	NA
TCGA-VQ-A8E0	M	68	intestinal	III	NA	Body	NA	negative	MSS	BLACK OR AFRICAN AMERICAN	G3	1	18.7333	1	17.7	TCGA	NA	NA	NA	Frame_Shift_Del	NA	NA	NA	NA	NA	NA	NA	NA
TCGA-VQ-A8E2	M	57	intestinal	III	NA	Body	NA	negative	MSS	ASIAN	G2	0	43.9667	0	43.9667	TCGA	NA	NA	NA	Missense_Mutation	NA	NA	NA	NA	NA	NA	NA	NA
TCGA-VQ-A8E3	M	79	intestinal	II	NA	Antrum	NA	negative	MSI-H	WHITE	G3	1	22.0333	1	17.9333	TCGA	NA	NA	NA	Nonsense_Mutation	NA	NA	Missense_Mutation	NA	NA	NA	NA	NA
TCGA-VQ-A8E7	M	59	intestinal	IV	NA	Gastroesophageal Junction	NA	negative	MSS	WHITE	G2	0	37.9333	1	34.9333	TCGA	Distant Metastasis	NA	NA	Missense_Mutation	NA	NA	NA	NA	NA	NA	NA	NA
TCGA-VQ-A8P2	M	68	intestinal	III	NA	Body	NA	negative	MSI-H	WHITE	G2	0	38.6667	0	38.6667	TCGA	NA	Missense_Mutation;Nonsense_Mutation	NA	Missense_Mutation;Missense_Mutation;Missense_Mutation	NA	Missense_Mutation	Missense_Mutation;Missense_Mutation;Frame_Shift_Del;Splice_Site;Missense_Mutation	Missense_Mutation;Missense_Mutation;Missense_Mutation	NA	Missense_Mutation;Missense_Mutation	Missense_Mutation;Missense_Mutation	NA
TCGA-VQ-A8P3	M	72	intestinal	III	NA	Body	NA	negative	MSS	WHITE	G2	0	37.7333	0	37.7333	TCGA	NA	NA	NA	NA	NA	Missense_Mutation	Missense_Mutation	NA	NA	NA	NA	NA
TCGA-VQ-A8P5	M	67	intestinal	II	NA	Body	NA	negative	MSI-L	WHITE	G3	1	7.83333	0	7.83333	TCGA	NA	NA	NA	Splice_Site	Nonsense_Mutation	NA	NA	NA	NA	NA	NA	NA
TCGA-VQ-A8P8	F	72	intestinal	II	NA	Body	NA	negative	MSS	BLACK OR AFRICAN AMERICAN	G2	0	31.4	0	31.4	TCGA	NA	NA	NA	NA	NA	NA	NA	NA	NA	NA	NA	NA
TCGA-VQ-A8PB	F	65	intestinal	II	NA	Antrum	NA	negative	MSI-H	WHITE	G2	1	34.7667	0	34.7667	TCGA	NA	NA	NA	NA	NA	NA	Missense_Mutation	NA	NA	Missense_Mutation	NA	NA
TCGA-VQ-A8PC	M	65	NA	III	NA	Antrum	NA	negative	MSS	WHITE	G3	1	46.9	1	42.9	TCGA	NA	NA	NA	Splice_Site	NA	NA	Missense_Mutation	Missense_Mutation	NA	NA	NA	NA
TCGA-VQ-A8PD	M	69	NA	III	NA	Body	NA	negative	MSS	WHITE	G2	1	16.5333	1	4.46667	TCGA	NA	NA	NA	NA	NA	NA	NA	NA	NA	NA	NA	NA
TCGA-VQ-A8PE	M	78	intestinal	III	NA	Cardia	NA	negative	MSS	WHITE	G3	1	22.5	1	8.83333	TCGA	NA	Missense_Mutation	NA	Nonsense_Mutation	NA	NA	NA	NA	NA	NA	NA	NA
TCGA-VQ-A8PF	M	76	intestinal	III	NA	Body	NA	negative	MSS	NA	G3	1	2.53333	0	2.53333	TCGA	NA	NA	NA	NA	NA	NA	NA	NA	NA	Missense_Mutation;Missense_Mutation	NA	NA
TCGA-VQ-A8PH	M	62	intestinal	III	NA	Antrum	NA	negative	MSS	WHITE	G2	1	12.9667	1	12.5667	TCGA	NA	NA	NA	Missense_Mutation	NA	NA	NA	NA	NA	NA	NA	NA
TCGA-VQ-A8PJ	M	53	intestinal	IV	NA	Body	NA	negative	MSS	NA	GX	1	2.73333	1	2.73333	TCGA	NA	NA	NA	Splice_Site	NA	NA	Missense_Mutation	NA	NA	NA	NA	NA
TCGA-VQ-A8PK	M	58	intestinal	III	NA	Gastroesophageal Junction	NA	negative	MSS	WHITE	G2	1	18.1	1	8.76667	TCGA	NA	NA	NA	Missense_Mutation	NA	NA	NA	NA	NA	NA	NA	NA
TCGA-VQ-A8PM	M	56	NA	IV	NA	Cardia	NA	negative	MSS	WHITE	G3	1	1.9	1	1.9	TCGA	NA	NA	NA	Splice_Site	NA	NA	NA	NA	NA	NA	NA	NA
TCGA-VQ-A8PO	M	74	NA	II	NA	Antrum	NA	negative	MSI-H	WHITE	G3	1	9.4	1	8.53333	TCGA	NA	NA	NA	NA	NA	Missense_Mutation	NA	NA	Missense_Mutation	NA	In_Frame_Del	NA
TCGA-VQ-A8PP	M	76	intestinal	IV	NA	Body	NA	negative	MSI-H	NA	G2	1	23.7333	1	16.7333	TCGA	NA	NA	Missense_Mutation	Missense_Mutation	NA	Missense_Mutation	Missense_Mutation	Missense_Mutation	NA	Missense_Mutation	NA	NA
TCGA-VQ-A8PQ	F	50	intestinal	IV	NA	Cardia	NA	negative	MSS	WHITE	G2	1	15.8667	1	3.03333	TCGA	NA	NA	NA	NA	NA	NA	NA	NA	NA	NA	NA	NA
TCGA-VQ-A8PS	M	76	intestinal	III	NA	NA	NA	negative	MSS	WHITE	G2	1	13.5333	1	4.36667	TCGA	NA	NA	NA	NA	NA	NA	NA	NA	NA	NA	NA	NA
TCGA-VQ-A8PT	M	65	intestinal	III	NA	Body	NA	negative	MSI-H	WHITE	G3	0	30	0	30	TCGA	NA	NA	NA	NA	NA	Missense_Mutation;Missense_Mutation	NA	NA	NA	NA	NA	NA
TCGA-VQ-A8PU	F	72	intestinal	III	NA	Body	NA	negative	MSS	WHITE	G3	1	27.7333	0	27.7333	TCGA	NA	NA	Missense_Mutation	NA	Missense_Mutation	NA	NA	NA	NA	NA	NA	NA
TCGA-VQ-A8PX	M	51	intestinal	I	NA	NA	NA	negative	MSI-H	NA	G2	0	65.4667	0	65.4667	TCGA	NA	NA	NA	Missense_Mutation;Missense_Mutation	Missense_Mutation	NA	Missense_Mutation	NA	NA	NA	NA	NA
TCGA-VQ-A8PY	F	47	intestinal	III	NA	Antrum	NA	negative	MSS	WHITE	G2	1	14.5333	0	14.5333	TCGA	NA	NA	NA	Missense_Mutation	NA	NA	NA	NA	NA	NA	NA	NA
TCGA-VQ-A8PZ	F	56	NA	II	NA	Body	NA	negative	MSS	WHITE	G3	0	74.4333	0	74.4333	TCGA	NA	NA	NA	NA	NA	NA	NA	NA	NA	NA	NA	NA
TCGA-VQ-A91A	M	67	intestinal	III	NA	Body	NA	negative	MSS	WHITE	G1	0	40	1	4.3	TCGA	NA	NA	NA	NA	NA	NA	NA	NA	NA	NA	NA	NA
TCGA-VQ-A91D	M	70	intestinal	III	NA	Body	NA	negative	MSI-H	WHITE	G2	1	11.8667	1	11.7	TCGA	NA	NA	Missense_Mutation	NA	NA	Missense_Mutation	NA	Missense_Mutation;Missense_Mutation	NA	Missense_Mutation	NA	Missense_Mutation;Missense_Mutation
TCGA-VQ-A91E	F	67	intestinal	III	NA	Antrum	NA	negative	MSI-H	WHITE	G3	0	22.1333	0	22.1333	TCGA	NA	NA	Missense_Mutation	Missense_Mutation	NA	Missense_Mutation	Missense_Mutation	Missense_Mutation	NA	Missense_Mutation	NA	NA
TCGA-VQ-A91K	M	69	intestinal	III	NA	Antrum	NA	negative	MSI-H	WHITE	G2	0	62.0667	0	62.0667	TCGA	NA	NA	NA	NA	Missense_Mutation	Missense_Mutation;Nonsense_Mutation	Missense_Mutation	NA	NA	Missense_Mutation;Missense_Mutation	NA	NA
TCGA-VQ-A91N	F	59	intestinal	IV	NA	Antrum	NA	negative	MSS	NA	G2	1	19	1	14.6	TCGA	NA	NA	NA	Frame_Shift_Del	NA	NA	Missense_Mutation	NA	NA	NA	NA	NA
TCGA-VQ-A91Q	M	61	intestinal	IV	NA	Cardia	NA	negative	MSS	NA	G3	1	21.1	1	18.3667	TCGA	NA	NA	NA	NA	NA	NA	NA	NA	NA	NA	NA	NA
TCGA-VQ-A91S	M	63	intestinal	III	NA	Body	NA	positive	MSS	BLACK OR AFRICAN AMERICAN	GX	0	33.3333	0	33.3333	TCGA	NA	NA	NA	Missense_Mutation	NA	NA	Missense_Mutation	NA	NA	NA	NA	NA
TCGA-VQ-A91U	M	78	intestinal	III	NA	Gastroesophageal Junction	NA	negative	MSS	ASIAN	G2	1	1.73333	0	1.73333	TCGA	NA	Missense_Mutation	NA	Frame_Shift_Del	Missense_Mutation	NA	NA	NA	NA	NA	NA	NA
TCGA-VQ-A91V	M	58	intestinal	III	NA	Gastroesophageal Junction	NA	negative	MSS	NA	G2	0	43.2333	1	16.8	TCGA	Distant Metastasis	NA	NA	Missense_Mutation	NA	NA	NA	NA	NA	NA	NA	NA
TCGA-VQ-A91W	M	30	intestinal	III	NA	Body	NA	negative	MSI-L	WHITE	G2	0	61.7	0	61.7	TCGA	NA	NA	NA	NA	NA	NA	NA	NA	NA	Missense_Mutation;Missense_Mutation	NA	NA
TCGA-VQ-A91X	M	74	intestinal	III	NA	Antrum	NA	negative	MSI-L	WHITE	G3	1	9.63333	0	9.63333	TCGA	NA	NA	NA	Missense_Mutation	NA	NA	Missense_Mutation;Missense_Mutation	NA	NA	NA	NA	NA
TCGA-VQ-A91Y	M	67	intestinal	III	NA	Antrum	NA	negative	MSS	WHITE	G3	1	9.86667	1	8.6	TCGA	NA	NA	NA	Missense_Mutation;Missense_Mutation	NA	NA	NA	NA	NA	NA	NA	NA
TCGA-VQ-A91Z	F	67	intestinal	III	NA	Antrum	NA	negative	MSS	WHITE	G2	0	56.3333	1	43.6667	TCGA	NA	NA	NA	Missense_Mutation	NA	Missense_Mutation	NA	NA	NA	NA	NA	NA
TCGA-VQ-A922	M	70	intestinal	IV	NA	Antrum	NA	negative	MSI-L	NA	G2	1	9.16667	1	8.4	TCGA	NA	NA	NA	Missense_Mutation	NA	NA	NA	NA	NA	NA	NA	NA
TCGA-VQ-A923	M	90	intestinal	III	NA	Body	NA	negative	MSS	WHITE	G3	1	2.03333	0	2.03333	TCGA	NA	NA	NA	Missense_Mutation	NA	NA	NA	NA	NA	NA	Splice_Site	NA
TCGA-VQ-A924	M	69	intestinal	II	NA	Antrum	NA	negative	MSI-H	NA	G2	1	56.2	1	56.2	TCGA	NA	NA	NA	NA	NA	Frame_Shift_Del	NA	NA	NA	Missense_Mutation	NA	NA
TCGA-VQ-A925	M	66	intestinal	III	NA	Antrum	NA	negative	MSS	WHITE	G2	1	4.6	1	4.6	TCGA	NA	NA	NA	Missense_Mutation;Splice_Site	NA	NA	Missense_Mutation	NA	NA	NA	NA	NA
TCGA-VQ-A927	M	81	diffuse	III	NA	Body	NA	negative	MSS	WHITE	G1	1	6.66667	1	6.66667	TCGA	NA	NA	NA	NA	NA	NA	Missense_Mutation	NA	NA	NA	NA	NA
TCGA-VQ-A928	M	49	intestinal	IV	NA	Body	NA	negative	MSS	WHITE	G2	1	5.8	1	4.93333	TCGA	NA	NA	NA	NA	NA	NA	NA	NA	NA	NA	NA	NA
TCGA-VQ-A92D	M	67	intestinal	I	NA	Cardia	NA	negative	MSI-L	WHITE	G2	0	67.7333	0	67.7333	TCGA	NA	NA	NA	NA	NA	NA	NA	NA	NA	NA	NA	NA
TCGA-VQ-A94O	M	74	intestinal	III	NA	Antrum	NA	negative	MSS	BLACK OR AFRICAN AMERICAN	G2	1	21.3333	1	6.16667	TCGA	NA	NA	NA	Missense_Mutation	NA	NA	Missense_Mutation	NA	NA	NA	NA	NA
TCGA-VQ-A94P	M	57	NA	NA	NA	Body	NA	negative	MSS	WHITE	GX	1	2.7	1	2.7	TCGA	NA	NA	NA	Missense_Mutation	NA	NA	Missense_Mutation	NA	NA	NA	NA	NA
TCGA-VQ-A94R	M	63	intestinal	NA	NA	Antrum	NA	negative	MSI-L	WHITE	G2	1	43.1333	1	33.9333	TCGA	NA	NA	NA	Splice_Site	NA	NA	NA	NA	NA	NA	NA	NA
TCGA-VQ-A94T	M	73	diffuse	III	NA	Cardia	NA	negative	MSI-L	NA	G3	1	11.4	1	9.86667	TCGA	NA	NA	Missense_Mutation	NA	NA	NA	NA	NA	NA	NA	NA	NA
TCGA-VQ-A94U	M	70	NA	II	NA	Antrum	NA	negative	MSS	WHITE	G3	0	27.3	0	27.3	TCGA	NA	NA	NA	Nonsense_Mutation	NA	NA	NA	NA	NA	NA	NA	NA
TCGA-VQ-AA64	M	68	intestinal	III	NA	Cardia	NA	negative	MSS	WHITE	G2	1	18.6667	1	18.6667	TCGA	NA	NA	NA	NA	NA	NA	NA	NA	NA	NA	NA	NA
TCGA-VQ-AA68	F	52	intestinal	III	NA	Gastroesophageal Junction	NA	negative	MSS	WHITE	G2	0	44.2667	0	44.2667	TCGA	NA	NA	NA	Nonsense_Mutation	NA	NA	NA	NA	Missense_Mutation	NA	NA	NA
TCGA-VQ-AA69	M	35	intestinal	III	NA	Gastroesophageal Junction	NA	negative	MSS	WHITE	G2	0	28.8	0	28.8	TCGA	NA	NA	Missense_Mutation	NA	NA	NA	NA	NA	NA	Missense_Mutation	NA	NA
TCGA-VQ-AA6A	M	56	intestinal	III	NA	Gastroesophageal Junction	NA	negative	MSS	WHITE	G2	0	39.4667	0	39.4667	TCGA	NA	NA	NA	Missense_Mutation	NA	Missense_Mutation	NA	NA	NA	NA	NA	NA
TCGA-VQ-AA6B	M	48	intestinal	III	NA	Gastroesophageal Junction	NA	positive	MSS	WHITE	G2	0	33.4	0	33.4	TCGA	NA	NA	NA	Missense_Mutation	NA	NA	Missense_Mutation;Frame_Shift_Del	NA	NA	NA	NA	NA
TCGA-VQ-AA6D	F	52	intestinal	III	NA	Antrum	NA	positive	MSI-H	NA	G2	0	17.3667	0	17.3667	TCGA	NA	NA	NA	NA	NA	Missense_Mutation	NA	Frame_Shift_Del	NA	NA	NA	NA
TCGA-VQ-AA6F	M	57	intestinal	II	NA	Cardia	NA	negative	MSS	WHITE	G2	0	54.8667	1	18.2	TCGA	NA	NA	NA	NA	NA	NA	NA	NA	NA	NA	NA	NA
TCGA-VQ-AA6G	M	68	intestinal	II	NA	Cardia	NA	negative	MSS	WHITE	G2	1	26.4	1	15.6333	TCGA	NA	NA	NA	Missense_Mutation	NA	NA	Missense_Mutation	NA	NA	NA	NA	NA
TCGA-VQ-AA6I	M	68	intestinal	III	NA	Gastroesophageal Junction	NA	negative	MSS	WHITE	G3	1	16.3667	1	15.8333	TCGA	NA	NA	NA	Missense_Mutation	NA	NA	Missense_Mutation	NA	NA	NA	NA	NA
TCGA-VQ-AA6J	M	75	intestinal	III	NA	Cardia	NA	negative	MSS	BLACK OR AFRICAN AMERICAN	G3	0	27.9333	0	27.9333	TCGA	NA	NA	NA	NA	NA	NA	Missense_Mutation	NA	NA	NA	NA	NA
TCGA-VQ-AA6K	M	59	NA	III	NA	Cardia	NA	negative	MSS	WHITE	G3	1	12.6	1	11.0667	TCGA	NA	NA	NA	NA	NA	NA	NA	Missense_Mutation	NA	Missense_Mutation	NA	NA
TCGA-ZA-A8F6	M	71	intestinal	I	NA	Antrum	NA	negative	MSS	WHITE	G2	0	17.5	0	17.5	TCGA	NA	NA	NA	NA	NA	NA	NA	NA	NA	NA	NA	NA
TCGA-ZQ-A9CR	F	79	intestinal	III	NA	Antrum	NA	negative	MSI-L	WHITE	G3	1	0.8	0	0.8	TCGA	NA	NA	NA	Splice_Site	NA	NA	Missense_Mutation;Missense_Mutation	NA	NA	NA	NA	NA

## Sheet: TianJin
Sample	Sex	Age	Lauren	Stage	Differentiation	Location	EBV_status	H_pylori_status	MSI_status	Race	histological_grade	OS	OS.time	PFI	PFI.time	Study	Documented recurrence
PGM1	M	67	intestinal	II	NA	Body	negative	NA	NA	ASIAN	NA	0	78.95	NA	NA	TianJin	NA
PGM10	F	33	diffuse	IV	NA	Body	negative	NA	NA	ASIAN	NA	0	3.74	NA	NA	TianJin	NA
PGM11	M	59	diffuse	II	NA	Body	positive	NA	NA	ASIAN	NA	1	67.64	NA	NA	TianJin	NA
PGM12	F	58	intestinal	IV	NA	Antrum	negative	NA	NA	ASIAN	2	1	28.49	NA	NA	TianJin	NA
PGM13	M	60	diffuse	IV	NA	Body	positive	NA	NA	ASIAN	3	1	45.15	NA	NA	TianJin	NA
PGM14	M	55	diffuse	II	NA	Cardia	positive	NA	NA	ASIAN	NA	1	10.69	NA	NA	TianJin	NA
PGM15	M	61	intestinal	IV	NA	Body	positive	NA	NA	ASIAN	2	0	NA	NA	NA	TianJin	NA
PGM16	M	52	intestinal	II	NA	Body	positive	NA	NA	ASIAN	3	0	68.82	NA	NA	TianJin	NA
PGM17	M	50	diffuse	III	NA	Antrum	negative	NA	NA	ASIAN	3	1	6.43	NA	NA	TianJin	NA
PGM18	F	76	diffuse	II	NA	Antrum	positive	NA	NA	ASIAN	9	0	63.57	NA	NA	TianJin	NA
PGM19	M	40	intestinal	III	NA	Antrum	positive	NA	NA	ASIAN	2	1	20.46	NA	NA	TianJin	NA
PGM2	M	39	diffuse	III	NA	Body	positive	NA	NA	ASIAN	3	1	9.74	NA	NA	TianJin	NA
PGM20	M	58	diffuse	III	NA	Body	negative	NA	NA	ASIAN	NA	1	43.28	NA	NA	TianJin	NA
PGM21	F	48	diffuse	IV	NA	Antrum	positive	NA	NA	ASIAN	NA	0	4.72	NA	NA	TianJin	NA
PGM22	F	55	diffuse	II	NA	Cardia	positive	NA	NA	ASIAN	NA	0	63.84	NA	NA	TianJin	NA
PGM23	M	54	intestinal	II	NA	Cardia	negative	NA	NA	ASIAN	2	0	63.44	NA	NA	TianJin	NA
PGM24	M	63	intestinal	II	NA	Cardia	positive	NA	NA	ASIAN	1	0	58.52	NA	NA	TianJin	NA
PGM25	M	58	intestinal	II	NA	Cardia	positive	NA	NA	ASIAN	2	0	63.08	NA	NA	TianJin	NA
PGM26	M	50	diffuse	III	NA	Cardia	positive	NA	NA	ASIAN	NA	0	18.98	NA	NA	TianJin	NA
PGM27	M	55	diffuse	II	NA	Body	positive	NA	NA	ASIAN	NA	0	60.92	NA	NA	TianJin	NA
PGM28	M	62	intestinal	II	NA	Cardia	negative	NA	NA	ASIAN	2	1	11.84	NA	NA	TianJin	NA
PGM29	M	72	diffuse	I	NA	Cardia	positive	NA	NA	ASIAN	NA	0	5.41	NA	NA	TianJin	NA
PGM3	M	59	diffuse	IV	NA	Body	negative	NA	NA	ASIAN	NA	1	14.43	NA	NA	TianJin	NA
PGM30	F	59	diffuse	III	NA	Antrum	positive	NA	NA	ASIAN	NA	0	20.69	NA	NA	TianJin	NA
PGM31	M	61	diffuse	IV	NA	Cardia	positive	NA	NA	ASIAN	3	0	31.61	NA	NA	TianJin	NA
PGM32	M	67	intestinal	III	NA	Cardia	positive	NA	NA	ASIAN	2	1	14.03	NA	NA	TianJin	NA
PGM33	M	82	diffuse	II	NA	Cardia	positive	NA	NA	ASIAN	3	0	13.7	NA	NA	TianJin	NA
PGM34	F	53	intestinal	III	NA	Antrum	positive	NA	NA	ASIAN	2	0	58.82	NA	NA	TianJin	NA
PGM35	M	64	intestinal	II	NA	Body	negative	NA	NA	ASIAN	2	0	53.38	NA	NA	TianJin	NA
PGM36	M	68	intestinal	II	NA	Antrum	negative	NA	NA	ASIAN	2	0	58.36	NA	NA	TianJin	NA
PGM37	M	65	intestinal	IV	NA	Cardia	positive	NA	NA	ASIAN	2	0	0.2	NA	NA	TianJin	NA
PGM38	M	33	diffuse	III	NA	Antrum	negative	NA	NA	ASIAN	3	1	19.02	NA	NA	TianJin	NA
PGM39	M	74	intestinal	IV	NA	Cardia	positive	NA	NA	ASIAN	2	1	11.74	NA	NA	TianJin	NA
PGM4	M	67	diffuse	III	NA	Body	positive	NA	NA	ASIAN	NA	0	9.8	NA	NA	TianJin	NA
PGM40	M	54	intestinal	III	NA	Cardia	positive	NA	NA	ASIAN	2	0	26.82	NA	NA	TianJin	NA
PGM41	F	64	diffuse	III	NA	Antrum	positive	NA	NA	ASIAN	3	1	13.77	NA	NA	TianJin	NA
PGM42	M	58	intestinal	IV	NA	Cardia	negative	NA	NA	ASIAN	2	0	55.57	NA	NA	TianJin	NA
PGM43	F	63	intestinal	II	NA	Body	negative	NA	NA	ASIAN	2	0	55.41	NA	NA	TianJin	NA
PGM44	F	55	intestinal	III	NA	Antrum	positive	NA	NA	ASIAN	2	0	55.34	NA	NA	TianJin	NA
PGM45	M	41	diffuse	III	NA	Cardia	negative	NA	NA	ASIAN	3	0	54.95	NA	NA	TianJin	NA
PGM46	F	73	intestinal	II	NA	Antrum	negative	NA	NA	ASIAN	2	1	41.8	NA	NA	TianJin	NA
PGM47	F	46	diffuse	II	NA	Cardia	positive	NA	NA	ASIAN	3	1	24.43	NA	NA	TianJin	NA
PGM48	F	50	diffuse	II	NA	Body	negative	NA	NA	ASIAN	3	0	53.02	NA	NA	TianJin	NA
PGM49	M	47	diffuse	II	NA	Body	negative	NA	NA	ASIAN	3	1	36.75	NA	NA	TianJin	NA
PGM5	M	49	diffuse	III	NA	Antrum	positive	NA	NA	ASIAN	NA	0	40.82	NA	NA	TianJin	NA
PGM50	M	64	intestinal	II	NA	Body	negative	NA	NA	ASIAN	3	1	13.41	NA	NA	TianJin	NA
PGM51	F	41	diffuse	III	NA	Body	positive	NA	NA	ASIAN	NA	1	20.69	NA	NA	TianJin	NA
PGM52	M	50	intestinal	IV	NA	Antrum	negative	NA	NA	ASIAN	2	0	45.25	NA	NA	TianJin	NA
PGM53	F	68	intestinal	III	NA	Antrum	positive	NA	NA	ASIAN	3	1	24.03	NA	NA	TianJin	NA
PGM54	M	66	intestinal	III	NA	Cardia	negative	NA	NA	ASIAN	2	1	9.57	NA	NA	TianJin	NA
PGM55	F	69	diffuse	III	NA	Antrum	negative	NA	NA	ASIAN	NA	0	47.54	NA	NA	TianJin	NA
PGM56	M	25	diffuse	III	NA	Antrum	negative	NA	NA	ASIAN	3	1	NA	NA	NA	TianJin	NA
PGM57	M	27	diffuse	IV	NA	Body	negative	NA	NA	ASIAN	3	1	7.11	NA	NA	TianJin	NA
PGM58	M	76	intestinal	IV	NA	Cardia	negative	NA	NA	ASIAN	3	1	25.84	NA	NA	TianJin	NA
PGM59	F	55	intestinal	III	NA	Cardia	positive	NA	NA	ASIAN	2	1	6.49	NA	NA	TianJin	NA
PGM6	F	35	intestinal	III	NA	Body	negative	NA	NA	ASIAN	NA	0	10.49	NA	NA	TianJin	NA
PGM60	F	45	intestinal	III	NA	Antrum	negative	NA	NA	ASIAN	3	0	45.18	NA	NA	TianJin	NA
PGM61	M	55	diffuse	III	NA	Antrum	positive	NA	NA	ASIAN	3	1	31.34	NA	NA	TianJin	NA
PGM62	M	67	diffuse	IV	NA	Antrum	positive	NA	NA	ASIAN	3	0	42.33	NA	NA	TianJin	NA
PGM63	M	55	intestinal	IV	NA	Antrum	negative	NA	NA	ASIAN	3	1	5.87	NA	NA	TianJin	NA
PGM64	M	72	intestinal	II	NA	Antrum	positive	NA	NA	ASIAN	3	0	1.7	NA	NA	TianJin	NA
PGM65	F	59	intestinal	I	NA	Antrum	negative	NA	NA	ASIAN	2	0	31.08	NA	NA	TianJin	NA
PGM66	M	77	diffuse	III	NA	Cardia	negative	NA	NA	ASIAN	3	0	8.79	NA	NA	TianJin	NA
PGM67	F	70	intestinal	IV	NA	Cardia	positive	NA	NA	ASIAN	2	0	25.67	NA	NA	TianJin	NA
PGM68	F	66	intestinal	III	NA	Cardia	negative	NA	NA	ASIAN	2	0	20.85	NA	NA	TianJin	NA
PGM69	F	67	intestinal	III	NA	Body	negative	NA	NA	ASIAN	NA	0	27.8	NA	NA	TianJin	NA
PGM7	F	66	intestinal	III	NA	Body	positive	NA	NA	ASIAN	2	0	11.48	NA	NA	TianJin	NA
PGM70	F	56	intestinal	IV	NA	Cardia	negative	NA	NA	ASIAN	2	0	26.36	NA	NA	TianJin	NA
PGM71	F	69	intestinal	III	NA	Body	negative	NA	NA	ASIAN	2	1	10.69	NA	NA	TianJin	NA
PGM72	F	34	diffuse	IV	NA	Antrum	negative	NA	NA	ASIAN	NA	0	27.15	NA	NA	TianJin	NA
PGM73	F	58	diffuse	II	NA	Body	negative	NA	NA	ASIAN	3	0	26.85	NA	NA	TianJin	NA
PGM74	F	48	diffuse	IV	NA	Body	positive	NA	NA	ASIAN	3	0	25.08	NA	NA	TianJin	NA
PGM75	F	60	intestinal	III	NA	Body	negative	NA	NA	ASIAN	NA	1	14.36	NA	NA	TianJin	NA
PGM76	F	60	diffuse	III	NA	Cardia	negative	NA	NA	ASIAN	NA	0	21.8	NA	NA	TianJin	NA
PGM77	F	65	diffuse	III	NA	Cardia	negative	NA	NA	ASIAN	3	1	14.03	NA	NA	TianJin	NA
PGM78	F	61	intestinal	II	NA	Body	negative	NA	NA	ASIAN	NA	0	20.43	NA	NA	TianJin	NA
PGM8	M	70	diffuse	II	NA	Antrum	negative	NA	NA	ASIAN	9	1	11.54	NA	NA	TianJin	NA
PGM9	M	61	intestinal	IV	NA	Antrum	negative	NA	NA	ASIAN	2	0	50.92	NA	NA	TianJin	NA

## Sheet: HongKong
Sample	Sex	Age	Lauren	Stage	Differentiation	Location	EBV_status	H_pylori_status	MSI_status	Race	histological_grade	OS	OS.time	PFI	PFI.time	Study	Documented recurrence
pfg005T	F	71	diffuse	IV	poor	Antrum	negative	positive	MSS	ASIAN	NA	NA	NA	NA	NA	HongKong	NA
pfg008T	F	68	intestinal	II	moderate	Antrum	negative	positive	MSI	ASIAN	NA	NA	NA	NA	NA	HongKong	NA
pfg022T	M	61	intestinal	III	poor	Body	positive	negative	MSS	ASIAN	NA	NA	NA	NA	NA	HongKong	NA
pfg023T	F	65	mixed	III	poor	Body	negative	negative	MSS	ASIAN	NA	NA	NA	NA	NA	HongKong	NA
pfg030T	F	74	intestinal	III	moderate	Antrum	negative	negative	MSS	ASIAN	NA	NA	NA	NA	NA	HongKong	NA
pfg031T	F	53	mixed	IV	poor	Body	negative	negative	MSS	ASIAN	NA	NA	NA	NA	NA	HongKong	NA
pfg032T	M	84	intestinal	IV	poor	Antrum	negative	positive	MSS	ASIAN	NA	NA	NA	NA	NA	HongKong	NA
pfg034T	M	63	mixed	IV	poor	Antrum	negative	negative	MSS	ASIAN	NA	NA	NA	NA	NA	HongKong	NA
pfg035T	M	74	intestinal	IV	moderate	Cardia	negative	positive	MSS	ASIAN	NA	NA	NA	NA	NA	HongKong	NA
pfg036T	M	81	intestinal	III	poor	Body	positive	positive	MSS	ASIAN	NA	NA	NA	NA	NA	HongKong	NA
pfg038T	M	67	intestinal	IV	moderate	Antrum	negative	negative	MSS	ASIAN	NA	NA	NA	NA	NA	HongKong	NA
pfg039T	M	49	intestinal	IV	poor	Cardia	negative	positive	MSS	ASIAN	NA	NA	NA	NA	NA	HongKong	NA
pfg043T	M	76	intestinal	III	poor	Cardia	positive	negative	MSS	ASIAN	NA	NA	NA	NA	NA	HongKong	NA
pfg050T	M	61	diffuse	III	poor	Antrum	negative	negative	MSS	ASIAN	NA	NA	NA	NA	NA	HongKong	NA
pfg052T	M	70	intestinal	III	moderate	Body	negative	positive	MSS	ASIAN	NA	NA	NA	NA	NA	HongKong	NA
pfg053T	M	80	intestinal	I	poor	Cardia	negative	negative	MSS	ASIAN	NA	NA	NA	NA	NA	HongKong	NA
pfg054T	M	72	intestinal	IV	moderate	Antrum	negative	positive	MSS	ASIAN	NA	NA	NA	NA	NA	HongKong	NA
pfg057T	F	41	intestinal	IV	poor	Cardia	negative	negative	MSI	ASIAN	NA	NA	NA	NA	NA	HongKong	NA
pfg058T	M	59	intestinal	III	moderate	Antrum	negative	positive	MSS	ASIAN	NA	NA	NA	NA	NA	HongKong	NA
pfg059T	M	67	diffuse	IV	poor	Antrum	negative	negative	MSS	ASIAN	NA	NA	NA	NA	NA	HongKong	NA
pfg060T	F	83	intestinal	III	moderate	Cardia	negative	positive	MSS	ASIAN	NA	NA	NA	NA	NA	HongKong	NA
pfg062T	F	75	intestinal	IV	poor	Body	positive	positive	MSS	ASIAN	NA	NA	NA	NA	NA	HongKong	NA
pfg064T	F	84	diffuse	IV	poor	Body	negative	negative	MSS	ASIAN	NA	NA	NA	NA	NA	HongKong	NA
pfg065T	M	84	intestinal	III	moderate	Cardia	negative	positive	MSS	ASIAN	NA	NA	NA	NA	NA	HongKong	NA
pfg068T	F	74	intestinal	III	poor	Antrum	negative	negative	MSI	ASIAN	NA	NA	NA	NA	NA	HongKong	NA
pfg069T	F	72	intestinal	III	poor	Cardia	negative	negative	MSS	ASIAN	NA	NA	NA	NA	NA	HongKong	NA
pfg072T	M	78	intestinal	IV	moderate	Antrum	negative	positive	MSS	ASIAN	NA	NA	NA	NA	NA	HongKong	NA
pfg073T	F	63	diffuse	III	poor	Antrum	negative	negative	MSS	ASIAN	NA	NA	NA	NA	NA	HongKong	NA
pfg076T	F	88	intestinal	II	moderate	Antrum	negative	positive	MSS	ASIAN	NA	NA	NA	NA	NA	HongKong	NA
pfg081T	M	72	intestinal	IV	poor	Antrum	negative	positive	MSS	ASIAN	NA	NA	NA	NA	NA	HongKong	NA
pfg082T	M	72	intestinal	IV	poor	Cardia	negative	negative	MSS	ASIAN	NA	NA	NA	NA	NA	HongKong	NA
pfg088T	M	56	intestinal	IV	poor	Cardia	positive	positive	MSS	ASIAN	NA	NA	NA	NA	NA	HongKong	NA
pfg089T	M	66	mixed	IV	poor	Body	negative	positive	MSS	ASIAN	NA	NA	NA	NA	NA	HongKong	NA
pfg092T	M	72	intestinal	I	moderate	Cardia	negative	negative	MSS	ASIAN	NA	NA	NA	NA	NA	HongKong	NA
pfg094T	F	52	diffuse	III	poor	Diffuse	negative	negative	MSS	ASIAN	NA	NA	NA	NA	NA	HongKong	NA
pfg097T	F	74	diffuse	IV	poor	Body	negative	negative	MSS	ASIAN	NA	NA	NA	NA	NA	HongKong	NA
pfg099T	M	62	intestinal	IV	poor	Antrum	negative	positive	MSS	ASIAN	NA	NA	NA	NA	NA	HongKong	NA
pfg100T	M	82	intestinal	IV	poor	Cardia	negative	negative	MSS	ASIAN	NA	NA	NA	NA	NA	HongKong	NA
pfg102T	M	76	intestinal	IV	moderate	Antrum	negative	negative	MSS	ASIAN	NA	NA	NA	NA	NA	HongKong	NA
pfg103T	F	45	intestinal	IV	poor	Body	negative	positive	MSI	ASIAN	NA	NA	NA	NA	NA	HongKong	NA
pfg104T	M	47	intestinal	IV	poor	Cardia	positive	negative	MSS	ASIAN	NA	NA	NA	NA	NA	HongKong	NA
pfg105T	M	73	intestinal	I	moderate	Cardia	negative	positive	MSS	ASIAN	NA	NA	NA	NA	NA	HongKong	NA
pfg106T	F	59	intestinal	IV	poor	Body	negative	negative	MSS	ASIAN	NA	NA	NA	NA	NA	HongKong	NA
pfg107T	F	67	intestinal	IV	moderate	Cardia	negative	positive	MSS	ASIAN	NA	NA	NA	NA	NA	HongKong	NA
pfg108T	M	64	intestinal	III	moderate	Cardia	negative	negative	MSS	ASIAN	NA	NA	NA	NA	NA	HongKong	NA
pfg115T	F	75	mixed	IV	poor	Cardia	negative	negative	MSS	ASIAN	NA	NA	NA	NA	NA	HongKong	NA
pfg116T	M	78	mixed	IV	poor	Antrum	negative	negative	MSS	ASIAN	NA	NA	NA	NA	NA	HongKong	NA
pfg118T	F	84	mixed	II	moderate	Antrum	negative	positive	MSS	ASIAN	NA	NA	NA	NA	NA	HongKong	NA
pfg119T	M	84	mixed	IV	moderate	Antrum	negative	positive	MSS	ASIAN	NA	NA	NA	NA	NA	HongKong	NA
pfg120T	F	76	intestinal	III	moderate	Antrum	negative	negative	MSS	ASIAN	NA	NA	NA	NA	NA	HongKong	NA
pfg121T	M	80	intestinal	III	poor	Antrum	negative	negative	MSS	ASIAN	NA	NA	NA	NA	NA	HongKong	NA
pfg122T	F	83	intestinal	IV	poor	Antrum	negative	negative	MSI	ASIAN	NA	NA	NA	NA	NA	HongKong	NA
pfg123T	F	70	mixed	IV	poor	Body	negative	negative	MSS	ASIAN	NA	NA	NA	NA	NA	HongKong	NA
pfg124T	M	82	intestinal	III	poor	Antrum	negative	positive	MSS	ASIAN	NA	NA	NA	NA	NA	HongKong	NA
pfg125T	M	55	intestinal	III	poor	Cardia	negative	negative	MSS	ASIAN	NA	NA	NA	NA	NA	HongKong	NA
pfg127T	M	77	intestinal	III	moderate	Antrum	negative	positive	MSI	ASIAN	NA	NA	NA	NA	NA	HongKong	NA
pfg129T	M	68	intestinal	IV	poor	Cardia	negative	negative	MSI	ASIAN	NA	NA	NA	NA	NA	HongKong	NA
pfg130T	M	67	intestinal	III	moderate	Body	negative	positive	MSS	ASIAN	NA	NA	NA	NA	NA	HongKong	NA
pfg132T	M	45	intestinal	III	moderate	Cardia	negative	positive	MSS	ASIAN	NA	NA	NA	NA	NA	HongKong	NA
pfg135T	M	64	intestinal	IV	moderate	Cardia	negative	negative	MSS	ASIAN	NA	NA	NA	NA	NA	HongKong	NA
pfg136T	M	45	diffuse	IV	poor	Cardia	negative	negative	MSS	ASIAN	NA	NA	NA	NA	NA	HongKong	NA
pfg138T	F	32	diffuse	IV	poor	Body	negative	positive	MSS	ASIAN	NA	NA	NA	NA	NA	HongKong	NA
pfg142T	M	64	diffuse	IV	poor	Antrum	negative	positive	MSS	ASIAN	NA	NA	NA	NA	NA	HongKong	NA
pfg143T	F	79	intestinal	IV	moderate	Antrum	negative	positive	MSI	ASIAN	NA	NA	NA	NA	NA	HongKong	NA
pfg144T	M	77	intestinal	III	moderate	Body	negative	negative	MSS	ASIAN	NA	NA	NA	NA	NA	HongKong	NA
pfg145T	M	49	diffuse	II	poor	Body	negative	positive	MSS	ASIAN	NA	NA	NA	NA	NA	HongKong	NA
pfg146T	M	63	intestinal	III	moderate	Antrum	negative	positive	MSS	ASIAN	NA	NA	NA	NA	NA	HongKong	NA
pfg151T	F	41	diffuse	IV	poor	Body	negative	negative	MSS	ASIAN	NA	NA	NA	NA	NA	HongKong	NA
pfg156T	F	59	diffuse	IV	poor	Body	negative	negative	MSS	ASIAN	NA	NA	NA	NA	NA	HongKong	NA
pfg157T	M	76	mixed	III	poor	Body	negative	negative	MSS	ASIAN	NA	NA	NA	NA	NA	HongKong	NA
pfg160T	M	82	intestinal	I	poor	Antrum	negative	negative	MSS	ASIAN	NA	NA	NA	NA	NA	HongKong	NA
pfg164T	F	48	diffuse	III	poor	Antrum	negative	positive	MSS	ASIAN	NA	NA	NA	NA	NA	HongKong	NA
pfg166T	F	72	intestinal	IV	well	Cardia	negative	negative	MSS	ASIAN	NA	NA	NA	NA	NA	HongKong	NA
pfg167T	M	73	intestinal	IV	poor	Cardia	negative	positive	MSS	ASIAN	NA	NA	NA	NA	NA	HongKong	NA
pfg173T	M	61	intestinal	IV	moderate	Cardia	negative	positive	MSS	ASIAN	NA	NA	NA	NA	NA	HongKong	NA
pfg180T	M	75	diffuse	IV	poor	Antrum	negative	negative	MSS	ASIAN	NA	NA	NA	NA	NA	HongKong	NA
pfg181T	F	77	intestinal	IV	poor	Antrum	negative	negative	MSI	ASIAN	NA	NA	NA	NA	NA	HongKong	NA
pfg182T	F	39	diffuse	IV	poor	Antrum	negative	negative	MSS	ASIAN	NA	NA	NA	NA	NA	HongKong	NA
pfg205T	F	89	diffuse	IV	moderate	Antrum	negative	negative	MSS	ASIAN	NA	NA	NA	NA	NA	HongKong	NA
pfg212T	M	81	intestinal	I	moderate	Antrum	negative	negative	MSI	ASIAN	NA	NA	NA	NA	NA	HongKong	NA
pfg213T	F	79	diffuse	II	poor	Antrum	negative	positive	MSS	ASIAN	NA	NA	NA	NA	NA	HongKong	NA
pfg217T	M	85	intestinal	IV	poor	Cardia	negative	negative	MSS	ASIAN	NA	NA	NA	NA	NA	HongKong	NA
pfg220T	F	41	diffuse	II	poor	Antrum	negative	positive	MSS	ASIAN	NA	NA	NA	NA	NA	HongKong	NA
pfg222T	F	85	diffuse	IV	poor	Antrum	negative	negative	MSS	ASIAN	NA	NA	NA	NA	NA	HongKong	NA
pfg228T	F	58	diffuse	IV	poor	Body	negative	negative	MSS	ASIAN	NA	NA	NA	NA	NA	HongKong	NA
pfg258T	M	78	diffuse	I	poor	Cardia	negative	negative	MSS	ASIAN	NA	NA	NA	NA	NA	HongKong	NA
pfg272T	M	47	diffuse	III	poor	Antrum	negative	positive	MSS	ASIAN	NA	NA	NA	NA	NA	HongKong	NA
pfg277T	M	77	mixed	IV	poor	Cardia	negative	positive	MSS	ASIAN	NA	NA	NA	NA	NA	HongKong	NA
pfg282T	M	71	intestinal	NA	moderate	Antrum	negative	negative	MSS	ASIAN	NA	NA	NA	NA	NA	HongKong	NA
pfg311T	M	43	mixed	III	poor	Antrum	negative	negative	MSS	ASIAN	NA	NA	NA	NA	NA	HongKong	NA
pfg316T	M	56	diffuse	III	poor	Antrum	negative	positive	MSS	ASIAN	NA	NA	NA	NA	NA	HongKong	NA
pfg317T	F	43	diffuse	III	poor	Body	negative	negative	MSS	ASIAN	NA	NA	NA	NA	NA	HongKong	NA
pfg344T	M	78	diffuse	IV	poor	Antrum	negative	positive	MSS	ASIAN	NA	NA	NA	NA	NA	HongKong	NA
pfg373T	M	56	mixed	III	poor	Body	negative	negative	MSS	ASIAN	NA	NA	NA	NA	NA	HongKong	NA
pfg375T	F	45	diffuse	III	poor	Antrum	negative	negative	MSS	ASIAN	NA	NA	NA	NA	NA	HongKong	NA
pfg378T	M	48	mixed	I	moderate	Antrum	negative	positive	MSS	ASIAN	NA	NA	NA	NA	NA	HongKong	NA
pfg398T	F	44	diffuse	I	poor	Body	negative	positive	MSS	ASIAN	NA	NA	NA	NA	NA	HongKong	NA
pfg413T	M	65	intestinal	I	moderate	Body	negative	positive	MSS	ASIAN	NA	NA	NA	NA	NA	HongKong	NA
pfg416T	M	43	diffuse	III	poor	Body	negative	positive	MSS	ASIAN	NA	NA	NA	NA	NA	HongKong	NA
pfg424T	M	70	intestinal	IV	poor	Body	negative	positive	MSS	ASIAN	NA	NA	NA	NA	NA	HongKong	NA

## Sheet: S.Korea
Sample	Sex	Age	Lauren	Stage	Differentiation	Location	EBV_status	H_pylori_status	MSI_status	Race	histological_grade	OS	OS.time(months)	PFI	PFI.time	Study	Documented recurrence
T09	F	40	diffuse	III	NA	Cardia	negative	NA	NA	ASIAN	NA	NA	70.2	NA	NA	S.Korea	Yes
T04	F	46	diffuse	III	NA	Cardia	negative	NA	NA	ASIAN	NA	NA	31.3333	NA	NA	S.Korea	Yes
T44	M	50	diffuse	III	NA	Body	negative	NA	NA	ASIAN	NA	NA	45.6333	NA	NA	S.Korea	Yes
T49	F	50	diffuse	IV	NA	Body	negative	NA	NA	ASIAN	NA	NA	31.1	NA	NA	S.Korea	Yes
T10	M	51	diffuse	IV	poor	Body	negative	NA	NA	ASIAN	NA	NA	21.2333	NA	NA	S.Korea	Yes
T42	F	52	diffuse	III	NA	Body	negative	NA	NA	ASIAN	NA	NA	83.6	NA	NA	S.Korea	Yes
T36	F	56	diffuse	III	poor	Body	negative	NA	NA	ASIAN	NA	NA	12.9333	NA	NA	S.Korea	Yes
T08	M	58	diffuse	IV	poor	Antrum and Body	negative	NA	NA	ASIAN	NA	NA	94.4333	NA	NA	S.Korea	Not
T63	M	60	diffuse	IV	poor	Body	positive	NA	NA	ASIAN	NA	NA	16.8333	NA	NA	S.Korea	Yes
T48	F	69	diffuse	III	NA	Antrum	negative	NA	NA	ASIAN	NA	NA	11.0667	NA	NA	S.Korea	Yes
T58	M	72	diffuse	III	NA	Antrum	negative	NA	NA	ASIAN	NA	NA	12.0667	NA	NA	S.Korea	Yes
T29	F	73	diffuse	III	poor	Body	negative	NA	NA	ASIAN	NA	NA	19.7	NA	NA	S.Korea	Yes
T57	M	74	diffuse	IV	NA	entire	negative	NA	NA	ASIAN	NA	NA	8.63333	NA	NA	S.Korea	Yes
T31	M	24	diffuse	IV	poor	Body	negative	NA	NA	ASIAN	NA	NA	27.8	NA	NA	S.Korea	Yes
T15	M	34	diffuse	III	poor	Antrum	negative	NA	NA	ASIAN	NA	NA	9.03333	NA	NA	S.Korea	Yes
T28	M	39	diffuse	IV	poor	Antrum	negative	NA	NA	ASIAN	NA	NA	10.8333	NA	NA	S.Korea	Yes
T17	M	52	diffuse	IV	NA	Antrum	negative	NA	NA	ASIAN	NA	NA	11.4667	NA	NA	S.Korea	Yes
T60	F	55	diffuse	IV	NA	Antrum	negative	NA	NA	ASIAN	NA	NA	36.1667	NA	NA	S.Korea	Yes
T26	M	58	diffuse	IV	poor	Body	positive	NA	NA	ASIAN	NA	NA	5.93333	NA	NA	S.Korea	Yes
T45	M	61	diffuse	III	NA	Body	negative	NA	NA	ASIAN	NA	NA	59.7	NA	NA	S.Korea	Not
T62	F	62	diffuse	III	poor	Cardia	negative	NA	NA	ASIAN	NA	NA	10.8333	NA	NA	S.Korea	Yes
T07	M	62	diffuse	III	poor	Body	positive	NA	NA	ASIAN	NA	NA	21.9667	NA	NA	S.Korea	Yes
T18	M	62	diffuse	III	poor	Antrum	negative	NA	NA	ASIAN	NA	NA	87.2667	NA	NA	S.Korea	Not
T06	M	63	diffuse	III	poor	Body	negative	NA	NA	ASIAN	NA	NA	11	NA	NA	S.Korea	Yes
T30	M	64	diffuse	III	poor	Antrum	negative	NA	NA	ASIAN	NA	NA	85.2333	NA	NA	S.Korea	Not
T38	F	65	diffuse	IV	NA	Body	negative	NA	NA	ASIAN	NA	NA	8.03333	NA	NA	S.Korea	Yes
T14	M	66	diffuse	IV	poor	Cardia	positive	NA	NA	ASIAN	NA	NA	53.0333	NA	NA	S.Korea	Yes
T19	F	67	diffuse	IV	poor	Cardia	negative	NA	NA	ASIAN	NA	NA	16.2333	NA	NA	S.Korea	Yes
T46	F	68	diffuse	III	poor	Antrum	negative	NA	NA	ASIAN	NA	NA	18.0667	NA	NA	S.Korea	Yes
T34	M	70	diffuse	IV	NA	Body	negative	NA	NA	ASIAN	NA	NA	8.33333	NA	NA	S.Korea	Yes
T20	M	72	diffuse	III	poor	Antrum	negative	NA	NA	ASIAN	NA	NA	86.8	NA	NA	S.Korea	Yes
T40	M	72	intestinal	III	NA	Antrum	negative	NA	NA	ASIAN	NA	NA	31.4667	NA	NA	S.Korea	Yes
T21	M	46	intestinal	IV	NA	Body	negative	NA	NA	ASIAN	NA	NA	86.7	NA	NA	S.Korea	Not
T27	M	51	intestinal	IV	NA	Antrum	negative	NA	NA	ASIAN	NA	NA	14.9667	NA	NA	S.Korea	Yes
T16	M	54	intestinal	IV	NA	Antrum	negative	NA	NA	ASIAN	NA	NA	17.4333	NA	NA	S.Korea	Yes
T50	M	55	intestinal	IV	NA	Antrum	negative	NA	NA	ASIAN	NA	NA	82	NA	NA	S.Korea	Yes
T23	M	59	intestinal	III	NA	Antrum	negative	NA	NA	ASIAN	NA	NA	21.2333	NA	NA	S.Korea	Yes
T25	F	60	intestinal	III	NA	Antrum	negative	NA	NA	ASIAN	NA	NA	85.9333	NA	NA	S.Korea	Not
T02	M	61	intestinal	III	NA	Antrum	negative	NA	NA	ASIAN	NA	NA	7.13333	NA	NA	S.Korea	Yes
T22	M	63	intestinal	III	NA	Antrum	negative	NA	NA	ASIAN	NA	NA	86.3667	NA	NA	S.Korea	Not
T112	M	65	intestinal	II	NA	Body	negative	NA	NA	ASIAN	NA	NA	23.6	NA	NA	S.Korea	Yes
T43	M	66	intestinal	III	NA	Antrum	negative	NA	NA	ASIAN	NA	NA	31.1333	NA	NA	S.Korea	Yes
T32	M	67	intestinal	III	NA	Antrum	negative	NA	NA	ASIAN	NA	NA	85.0333	NA	NA	S.Korea	Not
T13	M	69	intestinal	III	NA	Body	negative	NA	NA	ASIAN	NA	NA	38.3	NA	NA	S.Korea	Yes
T05	M	69	intestinal	III	NA	Cardia to Body	negative	NA	NA	ASIAN	NA	NA	35.9333	NA	NA	S.Korea	Yes
T55	M	70	intestinal	III	NA	Body	negative	NA	NA	ASIAN	NA	NA	79.9333	NA	NA	S.Korea	Not
T12	M	70	intestinal	IV	NA	Body	negative	NA	NA	ASIAN	NA	NA	12.8	NA	NA	S.Korea	Yes
T56	M	72	intestinal	III	NA	Antrum	negative	NA	NA	ASIAN	NA	NA	23.4333	NA	NA	S.Korea	Yes
T47	M	72	intestinal	III	NA	Body	negative	NA	NA	ASIAN	NA	NA	47.7	NA	NA	S.Korea	Yes

## Sheet: Japan
Sample	Sex	Age	Lauren	Stage	Differentiation	Location	EBV_status	H_pylori_status	MSI_status	Race	histological_grade	OS	OS.time	PFI	PFI.time	Study	Documented recurrence
GC299	M	NA	diffuse	I	NA	NA	NA	NA	NA	ASIAN	NA	NA	NA	NA	NA	Japan	NA
GC302	M	NA	diffuse	II	NA	NA	NA	NA	NA	ASIAN	NA	NA	NA	NA	NA	Japan	NA
GC307	M	NA	diffuse	I	NA	NA	NA	NA	NA	ASIAN	NA	NA	NA	NA	NA	Japan	NA
GC313	M	NA	diffuse	IV	NA	NA	NA	NA	NA	ASIAN	NA	NA	NA	NA	NA	Japan	NA
GC315	F	NA	diffuse	III	NA	NA	NA	NA	NA	ASIAN	NA	NA	NA	NA	NA	Japan	NA
GC332	F	NA	diffuse	III	NA	NA	NA	NA	NA	ASIAN	NA	NA	NA	NA	NA	Japan	NA
GC356	F	NA	diffuse	II	NA	NA	NA	NA	NA	ASIAN	NA	NA	NA	NA	NA	Japan	NA
GC342	M	NA	diffuse	III	NA	NA	NA	NA	NA	ASIAN	NA	NA	NA	NA	NA	Japan	NA
GC359	M	NA	diffuse	II	NA	NA	NA	NA	NA	ASIAN	NA	NA	NA	NA	NA	Japan	NA
GC383	M	NA	diffuse	III	NA	NA	NA	NA	NA	ASIAN	NA	NA	NA	NA	NA	Japan	NA
GC314	NA	NA	diffuse	NA	NA	NA	NA	NA	NA	ASIAN	NA	NA	NA	NA	NA	Japan	NA
GC337	NA	NA	diffuse	NA	NA	NA	NA	NA	NA	ASIAN	NA	NA	NA	NA	NA	Japan	NA
GC350	NA	NA	diffuse	NA	NA	NA	NA	NA	NA	ASIAN	NA	NA	NA	NA	NA	Japan	NA
GC296	NA	NA	diffuse	NA	NA	NA	NA	NA	NA	ASIAN	NA	NA	NA	NA	NA	Japan	NA
GC319	NA	NA	diffuse	NA	NA	NA	NA	NA	NA	ASIAN	NA	NA	NA	NA	NA	Japan	NA
GC343	NA	NA	diffuse	NA	NA	NA	NA	NA	NA	ASIAN	NA	NA	NA	NA	NA	Japan	NA
GC289	NA	NA	diffuse	NA	NA	NA	NA	NA	NA	ASIAN	NA	NA	NA	NA	NA	Japan	NA
GC325	NA	NA	diffuse	NA	NA	NA	NA	NA	NA	ASIAN	NA	NA	NA	NA	NA	Japan	NA
GC364	NA	NA	diffuse	NA	NA	NA	NA	NA	NA	ASIAN	NA	NA	NA	NA	NA	Japan	NA
GC297	NA	NA	diffuse	NA	NA	NA	NA	NA	NA	ASIAN	NA	NA	NA	NA	NA	Japan	NA
GC304	NA	NA	diffuse	NA	NA	NA	NA	NA	NA	ASIAN	NA	NA	NA	NA	NA	Japan	NA
GC340	NA	NA	diffuse	NA	NA	NA	NA	NA	NA	ASIAN	NA	NA	NA	NA	NA	Japan	NA
GC370	NA	NA	diffuse	NA	NA	NA	NA	NA	NA	ASIAN	NA	NA	NA	NA	NA	Japan	NA
GC353	NA	NA	diffuse	NA	NA	NA	NA	NA	NA	ASIAN	NA	NA	NA	NA	NA	Japan	NA
GC306	NA	NA	diffuse	NA	NA	NA	NA	NA	NA	ASIAN	NA	NA	NA	NA	NA	Japan	NA
GC310	NA	NA	diffuse	NA	NA	NA	NA	NA	NA	ASIAN	NA	NA	NA	NA	NA	Japan	NA
GC312	NA	NA	diffuse	NA	NA	NA	NA	NA	NA	ASIAN	NA	NA	NA	NA	NA	Japan	NA
GC351	NA	NA	diffuse	NA	NA	NA	NA	NA	NA	ASIAN	NA	NA	NA	NA	NA	Japan	NA
GC357	NA	NA	diffuse	NA	NA	NA	NA	NA	NA	ASIAN	NA	NA	NA	NA	NA	Japan	NA
GC361	NA	NA	diffuse	NA	NA	NA	NA	NA	NA	ASIAN	NA	NA	NA	NA	NA	Japan	NA

## Sheet: BeiJing
Sample	Sex	Age	Lauren	Stage	Differentiation	Location	EBV_status	H_pylori_status	MSI_status	Race	histological_grade	OS	OS.time	PFI	PFI.time	Study	Documented recurrence
GC001T	M	69	intestinal	III	NA	Others	negative	negative	MSS	ASIAN	NA	death	48	NA	NA	BeiJing	NA
GC003T	M	81	intestinal	II	NA	NA	negative	negative	MSI-L	ASIAN	NA	live	18	NA	NA	BeiJing	NA
GC004T	M	61	intestinal	II	NA	NA	negative	negative	MSS	ASIAN	NA	live	28	NA	NA	BeiJing	NA
GC008T	M	65	diffuse	IV	NA	Antrum	negative	negative	MSS	ASIAN	NA	live	NA	NA	NA	BeiJing	NA
GC011T	M	70	diffuse	III	NA	NA	negative	negative	MSS	ASIAN	NA	live	40	NA	NA	BeiJing	NA
GC014T	F	56	diffuse	III	NA	NA	negative	negative	MSI-L	ASIAN	NA	death	19	NA	NA	BeiJing	NA
GC016T	M	36	diffuse	II	NA	NA	positive	negative	MSS	ASIAN	NA	death	9	NA	NA	BeiJing	NA
GC018T	M	59	diffuse	III	NA	NA	positive	negative	MSS	ASIAN	NA	live	52	NA	NA	BeiJing	NA
GC020T	F	59	intestinal	IV	NA	NA	positive	negative	MSS	ASIAN	NA	death	8	NA	NA	BeiJing	NA
GC021T	M	55	intestinal	II	NA	NA	positive	negative	MSI-L	ASIAN	NA	live	38	NA	NA	BeiJing	NA
GC022T	M	58	intestinal	II	NA	NA	positive	negative	MSS	ASIAN	NA	live	23	NA	NA	BeiJing	NA
GC023T	M	66	intestinal	III	NA	NA	positive	negative	MSS	ASIAN	NA	death	9	NA	NA	BeiJing	NA
GC025T	M	71	intestinal	III	NA	NA	negative	positive	MSS	ASIAN	NA	death	21	NA	NA	BeiJing	NA
GC027T	F	57	diffuse	III	NA	NA	positive	negative	MSI-L	ASIAN	NA	death	55	NA	NA	BeiJing	NA
GC031T	M	74	intestinal	III	NA	NA	positive	negative	MSI-L	ASIAN	NA	live	32	NA	NA	BeiJing	NA
GC032T	M	73	intestinal	II	NA	NA	positive	negative	MSS	ASIAN	NA	live	55	NA	NA	BeiJing	NA
GC034T	M	79	intestinal	I	NA	NA	positive	negative	MSI-H	ASIAN	NA	live	56	NA	NA	BeiJing	NA
GC036T	M	66	intestinal	I	NA	Antrum	negative	negative	MSS	ASIAN	NA	live	37	NA	NA	BeiJing	NA
GC037T	M	73	intestinal	II	NA	Others	negative	negative	MSS	ASIAN	NA	death	10	NA	NA	BeiJing	NA
GC040T	F	60	diffuse	III	NA	Body	negative	negative	MSS	ASIAN	NA	live	33	NA	NA	BeiJing	NA
GC043T	M	58	diffuse	IV	NA	Body	negative	negative	MSS	ASIAN	NA	death	11	NA	NA	BeiJing	NA
GC044T	M	44	diffuse	III	NA	Antrum	negative	negative	MSS	ASIAN	NA	live	32	NA	NA	BeiJing	NA
GC047T	F	46	intestinal	III	NA	Body	negative	negative	MSS	ASIAN	NA	live	31	NA	NA	BeiJing	NA
GC048T	M	50	diffuse	I	NA	Antrum	negative	negative	MSS	ASIAN	NA	live	26	NA	NA	BeiJing	NA
GC049T	M	66	diffuse	III	NA	Others	negative	negative	MSS	ASIAN	NA	death	25	NA	NA	BeiJing	NA
GC050T	M	62	diffuse	I	NA	Body	negative	negative	MSS	ASIAN	NA	live	25	NA	NA	BeiJing	NA
GC051T	M	51	intestinal	I	NA	Antrum	negative	positive	MSS	ASIAN	NA	live	24	NA	NA	BeiJing	NA
GC052T	M	45	intestinal	III	NA	Antrum	negative	negative	MSS	ASIAN	NA	live	25	NA	NA	BeiJing	NA
GC054T	M	52	diffuse	I	NA	Others	negative	negative	MSS	ASIAN	NA	live	25	NA	NA	BeiJing	NA
GC055T	F	35	diffuse	IV	NA	Body	negative	negative	MSS	ASIAN	NA	death	5	NA	NA	BeiJing	NA
GC056T	F	52	diffuse	III	NA	Others	negative	positive	MSS	ASIAN	NA	live	20	NA	NA	BeiJing	NA
GC058T	M	64	intestinal	III	NA	Others	negative	negative	MSS	ASIAN	NA	live	20	NA	NA	BeiJing	NA
GC059T	M	55	intestinal	III	NA	Body	negative	negative	MSS	ASIAN	NA	live	19	NA	NA	BeiJing	NA
GC060T	F	69	diffuse	III	NA	Others	negative	negative	MSS	ASIAN	NA	death	2	NA	NA	BeiJing	NA
GC062T	M	58	diffuse	III	NA	Body	negative	negative	MSS	ASIAN	NA	live	18	NA	NA	BeiJing	NA
GC064T	F	31	diffuse	IV	NA	Body	negative	negative	MSS	ASIAN	NA	death	4	NA	NA	BeiJing	NA
GC065T	M	54	diffuse	III	NA	Body	negative	negative	MSS	ASIAN	NA	live	13	NA	NA	BeiJing	NA
GC066T	M	61	diffuse	III	NA	Others	negative	negative	MSS	ASIAN	NA	death	6	NA	NA	BeiJing	NA
GC067T	F	49	diffuse	III	NA	Body	negative	negative	MSS	ASIAN	NA	live	12	NA	NA	BeiJing	NA
GC068T	F	72	diffuse	III	NA	Others	negative	negative	MSS	ASIAN	NA	live	12	NA	NA	BeiJing	NA
GC069T	M	61	diffuse	III	NA	Body	negative	negative	MSS	ASIAN	NA	death	7	NA	NA	BeiJing	NA
GC070T	M	65	diffuse	IV	NA	Body	negative	negative	MSS	ASIAN	NA	death	8	NA	NA	BeiJing	NA
GC072T	M	52	diffuse	III	NA	Antrum	negative	positive	MSS	ASIAN	NA	death	3	NA	NA	BeiJing	NA
GC073T	F	63	intestinal	III	NA	Antrum	negative	negative	MSS	ASIAN	NA	live	6	NA	NA	BeiJing	NA
GC075T	M	66	diffuse	IV	NA	Body	negative	negative	MSS	ASIAN	NA	live	6	NA	NA	BeiJing	NA
GC077T	M	66	diffuse	I	NA	Others	negative	negative	MSS	ASIAN	NA	live	6	NA	NA	BeiJing	NA
GC078T	M	67	intestinal	IV	NA	Body	negative	negative	MSS	ASIAN	NA	live	6	NA	NA	BeiJing	NA
GC079T	M	67	diffuse	III	NA	Body	positive	negative	MSS	ASIAN	NA	live	6	NA	NA	BeiJing	NA
GC080T	M	58	diffuse	III	NA	Cardia	negative	negative	MSS	ASIAN	NA	live	6	NA	NA	BeiJing	NA
GC081T	M	55	intestinal	I	NA	Antrum	positive	negative	MSS	ASIAN	NA	live	6	NA	NA	BeiJing	NA
GC082T	M	69	intestinal	III	NA	Antrum	positive	negative	MSS	ASIAN	NA	live	6	NA	NA	BeiJing	NA
GC083T	M	63	intestinal	III	NA	Body	negative	negative	MSS	ASIAN	NA	live	6	NA	NA	BeiJing	NA
GC084T	M	65	intestinal	IV	NA	Body	positive	negative	MSS	ASIAN	NA	live	6	NA	NA	BeiJing	NA
GC085T	M	71	diffuse	II	NA	Cardia	positive	negative	MSS	ASIAN	NA	live	6	NA	NA	BeiJing	NA
GC086T	F	47	intestinal	III	NA	Cardia	negative	negative	MSS	ASIAN	NA	live	6	NA	NA	BeiJing	NA
GC087T	F	46	intestinal	III	NA	Antrum	negative	negative	MSS	ASIAN	NA	live	6	NA	NA	BeiJing	NA
GC089T	F	80	diffuse	I	NA	NA	negative	negative	MSI-L	ASIAN	NA	live	43	NA	NA	BeiJing	NA
GC090T	M	59	diffuse	III	NA	Antrum	negative	negative	MSS	ASIAN	NA	live	21	NA	NA	BeiJing	NA
GC091T	M	64	diffuse	III	NA	Antrum	negative	negative	MSS	ASIAN	NA	death	3	NA	NA	BeiJing	NA
GC092T	F	69	intestinal	II	NA	Antrum	negative	negative	MSS	ASIAN	NA	live	70	NA	NA	BeiJing	NA
GC093T	M	60	diffuse	III	NA	Body	negative	negative	MSS	ASIAN	NA	death	9	NA	NA	BeiJing	NA
GC094T	F	58	diffuse	I	NA	Body	negative	negative	MSS	ASIAN	NA	live	66	NA	NA	BeiJing	NA
GC095T	M	53	intestinal	III	NA	Antrum	negative	negative	MSS	ASIAN	NA	live	66	NA	NA	BeiJing	NA
GC098T	M	88	intestinal	IV	NA	Antrum	negative	negative	MSS	ASIAN	NA	death	6	NA	NA	BeiJing	NA
GC099T	F	67	diffuse	IV	NA	Body	negative	negative	MSS	ASIAN	NA	death	3	NA	NA	BeiJing	NA
GC100T	M	52	intestinal	II	NA	Body	positive	negative	MSS	ASIAN	NA	live	66	NA	NA	BeiJing	NA
GC101T	M	63	intestinal	IV	NA	Cardia	negative	negative	MSS	ASIAN	NA	death	12	NA	NA	BeiJing	NA
GC102T	M	50	intestinal	III	NA	Antrum	negative	negative	MSS	ASIAN	NA	live	62	NA	NA	BeiJing	NA
GC103T	M	46	diffuse	III	NA	Body	negative	negative	MSS	ASIAN	NA	death	8	NA	NA	BeiJing	NA
GC104T	M	50	diffuse	II	NA	Antrum	positive	negative	MSS	ASIAN	NA	live	67	NA	NA	BeiJing	NA
GC105T	M	61	diffuse	III	NA	Antrum	positive	negative	MSS	ASIAN	NA	death	4	NA	NA	BeiJing	NA
GC106T	M	65	intestinal	III	NA	Antrum	negative	negative	MSS	ASIAN	NA	death	9	NA	NA	BeiJing	NA
GC107T	M	59	diffuse	III	NA	Body	negative	negative	MSS	ASIAN	NA	death	10	NA	NA	BeiJing	NA
GC108T	F	64	intestinal	I	NA	Antrum	negative	negative	MSS	ASIAN	NA	live	25	NA	NA	BeiJing	NA
GC110T	F	76	intestinal	III	NA	Antrum	negative	negative	MSS	ASIAN	NA	death	8	NA	NA	BeiJing	NA
GC112T	M	65	intestinal	II	NA	Cardia	negative	negative	MSS	ASIAN	NA	live	55	NA	NA	BeiJing	NA
GC113T	F	64	intestinal	III	NA	Antrum	negative	negative	MSS	ASIAN	NA	live	55	NA	NA	BeiJing	NA
GC114T	M	66	diffuse	III	NA	Cardia	negative	negative	MSS	ASIAN	NA	death	34	NA	NA	BeiJing	NA
GC116T	F	34	diffuse	I	NA	Body	negative	negative	MSS	ASIAN	NA	live	7	NA	NA	BeiJing	NA
GC117T	M	55	intestinal	III	NA	Antrum	positive	negative	MSI-H	ASIAN	NA	live	52	NA	NA	BeiJing	NA
GC119T	M	73	diffuse	II	NA	Antrum	negative	negative	MSS	ASIAN	NA	death	30	NA	NA	BeiJing	NA
GC120T	F	71	diffuse	III	NA	Antrum	negative	negative	MSS	ASIAN	NA	death	30	NA	NA	BeiJing	NA
GC121T	M	57	diffuse	III	NA	Antrum	negative	negative	MSS	ASIAN	NA	death	26	NA	NA	BeiJing	NA
GC122T	F	51	intestinal	III	NA	Antrum	negative	negative	MSS	ASIAN	NA	live	50	NA	NA	BeiJing	NA
GC123T	M	76	diffuse	III	NA	Cardia	negative	negative	MSS	ASIAN	NA	death	6	NA	NA	BeiJing	NA
GC124T	M	66	diffuse	III	NA	Body	negative	negative	MSS	ASIAN	NA	death	28	NA	NA	BeiJing	NA
GC125T	F	75	diffuse	III	NA	Antrum	negative	negative	MSS	ASIAN	NA	live	45	NA	NA	BeiJing	NA
GC126T	M	55	intestinal	I	NA	Cardia	negative	negative	MSS	ASIAN	NA	live	45	NA	NA	BeiJing	NA
GC128T	M	80	intestinal	II	NA	Body	negative	negative	MSS	ASIAN	NA	live	40	NA	NA	BeiJing	NA
GC129T	F	46	diffuse	III	NA	Antrum	negative	negative	MSS	ASIAN	NA	death	19	NA	NA	BeiJing	NA
GC130T	M	70	diffuse	IV	NA	Antrum	negative	negative	MSS	ASIAN	NA	death	10	NA	NA	BeiJing	NA
GC131T	M	62	intestinal	III	NA	Body	negative	negative	MSS	ASIAN	NA	live	37	NA	NA	BeiJing	NA
GC132T	M	53	diffuse	IV	NA	Antrum	negative	negative	MSS	ASIAN	NA	death	6	NA	NA	BeiJing	NA
GC133T	M	60	intestinal	II	NA	Antrum	negative	negative	MSS	ASIAN	NA	live	40	NA	NA	BeiJing	NA
GC134T	F	57	diffuse	III	NA	Body	negative	negative	MSS	ASIAN	NA	death	20	NA	NA	BeiJing	NA
GC135T	M	70	diffuse	III	NA	Antrum	negative	negative	MSS	ASIAN	NA	live	40	NA	NA	BeiJing	NA
GC136T	F	53	diffuse	III	NA	Antrum	negative	negative	MSS	ASIAN	NA	live	40	NA	NA	BeiJing	NA
GC137T	M	69	intestinal	III	NA	Antrum	negative	negative	MSS	ASIAN	NA	live	40	NA	NA	BeiJing	NA
GC140T	M	46	intestinal	III	NA	Cardia	negative	positive	MSS	ASIAN	NA	live	40	NA	NA	BeiJing	NA
GC141T	M	73	intestinal	IV	NA	Cardia	negative	negative	MSS	ASIAN	NA	death	12	NA	NA	BeiJing	NA
GC142T	F	75	intestinal	III	NA	Antrum	positive	negative	MSS	ASIAN	NA	live	43	NA	NA	BeiJing	NA
GC143T	F	58	intestinal	II	NA	Antrum	negative	negative	MSS	ASIAN	NA	live	72	NA	NA	BeiJing	NA
GC144T	M	47	intestinal	III	NA	Cardia	negative	negative	MSS	ASIAN	NA	death	16	NA	NA	BeiJing	NA
GC145T	M	52	intestinal	II	NA	Antrum	negative	negative	MSS	ASIAN	NA	live	83	NA	NA	BeiJing	NA
GC146T	F	71	intestinal	III	NA	Antrum	negative	negative	MSS	ASIAN	NA	live	63	NA	NA	BeiJing	NA
GC147T	M	50	intestinal	III	NA	Antrum	negative	negative	MSS	ASIAN	NA	live	74	NA	NA	BeiJing	NA
GC148T	F	80	intestinal	II	NA	Antrum	negative	negative	MSS	ASIAN	NA	live	74	NA	NA	BeiJing	NA
GC149T	F	60	intestinal	III	NA	Antrum	negative	negative	MSS	ASIAN	NA	live	62	NA	NA	BeiJing	NA
GC150T	M	65	intestinal	III	NA	Antrum	negative	negative	MSS	ASIAN	NA	death	37	NA	NA	BeiJing	NA
GC151T	M	45	intestinal	III	NA	Antrum	negative	negative	MSS	ASIAN	NA	death	38	NA	NA	BeiJing	NA
GC152T	F	47	diffuse	III	NA	Others	negative	negative	MSS	ASIAN	NA	death	9	NA	NA	BeiJing	NA
GC153T	F	59	diffuse	III	NA	Cardia	negative	positive	MSS	ASIAN	NA	death	13	NA	NA	BeiJing	NA
GC154T	F	79	diffuse	NA	NA	Antrum	negative	negative	MSI-H	ASIAN	NA	live	77	NA	NA	BeiJing	NA
GC157T	F	62	intestinal	III	NA	Antrum	negative	negative	MSI-H	ASIAN	NA	live	84	NA	NA	BeiJing	NA
GC158T	M	47	diffuse	III	NA	Antrum	negative	negative	MSS	ASIAN	NA	live	NA	NA	NA	BeiJing	NA
GC159T	F	55	intestinal	II	NA	Others	negative	positive	MSS	ASIAN	NA	live	84	NA	NA	BeiJing	NA
GC160T	M	75	intestinal	IV	NA	Cardia	negative	positive	MSS	ASIAN	NA	death	12	NA	NA	BeiJing	NA
GC161T	M	48	intestinal	NA	NA	Antrum	negative	negative	MSS	ASIAN	NA	death	10	NA	NA	BeiJing	NA
GC163T	M	48	diffuse	III	NA	Antrum	negative	negative	MSS	ASIAN	NA	live	81	NA	NA	BeiJing	NA
GC164T	F	64	intestinal	III	NA	Body	negative	negative	MSS	ASIAN	NA	death	2	NA	NA	BeiJing	NA
GC167T	M	49	diffuse	II	NA	Antrum	negative	negative	MSS	ASIAN	NA	live	74	NA	NA	BeiJing	NA
GC168T	M	81	diffuse	II	NA	Body	negative	positive	MSS	ASIAN	NA	death	16	NA	NA	BeiJing	NA
GC169T	M	58	diffuse	III	NA	Cardia	negative	negative	MSS	ASIAN	NA	death	53	NA	NA	BeiJing	NA
GC170T	M	61	diffuse	III	NA	Others	negative	negative	MSS	ASIAN	NA	death	NA	NA	NA	BeiJing	NA
GC171T	M	37	intestinal	III	NA	Antrum	NA	NA	MSI	ASIAN	NA	live	109	NA	NA	BeiJing	NA
GC172T	F	47	intestinal	III	NA	Antrum	NA	NA	MSS	ASIAN	NA	death	39	NA	NA	BeiJing	NA
GC173T	M	69	diffuse	III	NA	Others	NA	NA	MSS	ASIAN	NA	live	48	NA	NA	BeiJing	NA
GC174T	M	64	diffuse	II	NA	Body	NA	NA	MSS	ASIAN	NA	death	21	NA	NA	BeiJing	NA
GC175T	M	62	intestinal	III	NA	Cardia	negative	positive	MSS	ASIAN	NA	live	12	NA	NA	BeiJing	NA
GC176T	F	67	intestinal	I	NA	Cardia	negative	negative	MSS	ASIAN	NA	live	13	NA	NA	BeiJing	NA
GC177T	F	68	intestinal	IV	NA	Cardia	negative	NA	MSS	ASIAN	NA	death	26	NA	NA	BeiJing	NA
GC178T	M	49	diffuse	IV	NA	Cardia	negative	negative	MSS	ASIAN	NA	death	12	NA	NA	BeiJing	NA
GC179T	F	65	intestinal	III	NA	Cardia	negative	negative	MSS	ASIAN	NA	death	8	NA	NA	BeiJing	NA
GC180T	M	64	intestinal	III	NA	Cardia	negative	negative	MSS	ASIAN	NA	live	97	NA	NA	BeiJing	NA
GC181T	M	74	intestinal	III	NA	Cardia	negative	negative	MSS	ASIAN	NA	live	72	NA	NA	BeiJing	NA
GC182T	M	69	diffuse	II	NA	Cardia	negative	negative	MSS	ASIAN	NA	death	32	NA	NA	BeiJing	NA
GC183T	F	57	intestinal	IV	NA	Cardia	negative	positive	MSS	ASIAN	NA	death	7	NA	NA	BeiJing	NA
GC184T	M	71	diffuse	I	NA	Antrum	negative	negative	MSS	ASIAN	NA	live	62	NA	NA	BeiJing	NA
GC185T	F	57	intestinal	IV	NA	Cardia	negative	negative	MSS	ASIAN	NA	death	53	NA	NA	BeiJing	NA
GC186T	M	48	diffuse	IV	NA	Antrum	negative	NA	MSS	ASIAN	NA	death	3	NA	NA	BeiJing	NA
GC187T	M	60	diffuse	II	NA	Antrum	positive	positive	MSS	ASIAN	NA	death	44	NA	NA	BeiJing	NA
GC188T	M	53	diffuse	IV	NA	Antrum	negative	negative	MSS	ASIAN	NA	death	19	NA	NA	BeiJing	NA
GC189T	M	63	diffuse	III	NA	Antrum	negative	positive	MSS	ASIAN	NA	death	10	NA	NA	BeiJing	NA
GC190T	M	39	diffuse	II	NA	Antrum	negative	NA	MSS	ASIAN	NA	live	48	NA	NA	BeiJing	NA
GC191T	M	62	diffuse	IV	NA	Cardia	NA	negative	MSS	ASIAN	NA	live	81	NA	NA	BeiJing	NA
GC192T	M	88	diffuse	III	NA	Cardia	positive	NA	MSS	ASIAN	NA	live	30	NA	NA	BeiJing	NA
GC193T	M	75	diffuse	II	NA	Antrum	negative	negative	MSS	ASIAN	NA	live	109	NA	NA	BeiJing	NA
GC194T	M	62	intestinal	III	NA	Antrum	positive	NA	MSS	ASIAN	NA	live	44	NA	NA	BeiJing	NA
GC195T	M	78	intestinal	IV	NA	Antrum	positive	NA	MSS	ASIAN	NA	death	3	NA	NA	BeiJing	NA
GC196T	F	55	diffuse	I	NA	Antrum	negative	positive	MSI	ASIAN	NA	live	28	NA	NA	BeiJing	NA
GC197T	M	59	intestinal	IV	NA	Antrum	positive	negative	MSS	ASIAN	NA	death	7	NA	NA	BeiJing	NA
GC198T	M	78	intestinal	II	NA	Antrum	positive	negative	MSS	ASIAN	NA	live	90	NA	NA	BeiJing	NA
GC199T	M	68	intestinal	II	NA	Antrum	positive	negative	MSS	ASIAN	NA	live	56	NA	NA	BeiJing	NA
GC200T	M	66	intestinal	IV	NA	Antrum	positive	negative	MSS	ASIAN	NA	death	10	NA	NA	BeiJing	NA
GC201T	F	70	intestinal	IV	NA	Antrum	positive	negative	MSI	ASIAN	NA	live	9	NA	NA	BeiJing	NA
GC202T	M	63	intestinal	III	NA	Antrum	positive	negative	MSS	ASIAN	NA	death	20	NA	NA	BeiJing	NA
GC203T	M	79	intestinal	IV	NA	Antrum	positive	negative	MSS	ASIAN	NA	death	17	NA	NA	BeiJing	NA
GC204T	M	70	intestinal	IV	NA	Antrum	positive	negative	MSS	ASIAN	NA	live	40	NA	NA	BeiJing	NA
GC205T	M	46	intestinal	IV	NA	Antrum	negative	NA	MSS	ASIAN	NA	live	34	NA	NA	BeiJing	NA
GC206T	M	70	intestinal	III	NA	Antrum	negative	negative	MSS	ASIAN	NA	death	26	NA	NA	BeiJing	NA
GC207T	M	64	intestinal	I	NA	Antrum	positive	negative	MSS	ASIAN	NA	death	15	NA	NA	BeiJing	NA
GC208T	M	75	intestinal	IV	NA	Cardia	positive	NA	MSS	ASIAN	NA	death	58	NA	NA	BeiJing	NA
GC209T	M	68	intestinal	III	NA	Cardia	negative	negative	MSS	ASIAN	NA	death	20	NA	NA	BeiJing	NA
GC210T	M	59	intestinal	IV	NA	Cardia	negative	negative	MSS	ASIAN	NA	live	34	NA	NA	BeiJing	NA
GC211T	M	62	intestinal	III	NA	Antrum	NA	negative	MSS	ASIAN	NA	death	84	NA	NA	BeiJing	NA
GC212T	M	65	intestinal	II	NA	Cardia	negative	negative	MSS	ASIAN	NA	live	16	NA	NA	BeiJing	NA
GC213T	M	78	intestinal	IV	NA	Cardia	negative	NA	MSS	ASIAN	NA	death	4	NA	NA	BeiJing	NA
GC214T	M	66	intestinal	IV	NA	Cardia	negative	NA	MSS	ASIAN	NA	live	17	NA	NA	BeiJing	NA

## Sheet: All
Tumor_Sample_Barcode	Sex	Age	Lauren	Stage	Differentiation	Location	EBV_status	H_pylori_status	MSI_status	Race	histological_grade	OS	OS.time	PFI	PFI.time	Study	Documented recurrence
NO418419	M	47	NA	III	Poor	Body	NA	NA	NA	ASIAN	NA	NA	NA	1	17	FuJian	Peritoneal Metastasis
NO428515	M	62	intestinal	IV	Well	Antrum	NA	NA	NA	ASIAN	NA	NA	NA	1	0.25	FuJian	Not
NO456290	F	50	intestinal	III	Poor	Body	NA	NA	NA	ASIAN	NA	NA	NA	1	13	FuJian	Peritoneal Metastasis
NO458208	F	40	NA	II	Poor	Body	NA	NA	NA	ASIAN	NA	NA	NA	1	10.75	FuJian	Peritoneal Metastasis
NO463529	M	70	diffuse	III	Poor	Body	NA	NA	NA	ASIAN	NA	NA	NA	1	3	FuJian	Peritoneal Metastasis
NO464726	M	60	diffuse	IV	Poor	Body	NA	NA	NA	ASIAN	NA	NA	NA	1	3.75	FuJian	Peritoneal Metastasis
NO470000	M	63	intestinal	III	Poor	Body	NA	NA	NA	ASIAN	NA	NA	NA	1	7	FuJian	Not
NO481115	M	62	intestinal	III	Poor	Body	NA	NA	NA	ASIAN	NA	NA	NA	1	16	FuJian	Peritoneal Metastasis
NO492120	F	68	diffuse	IV	NA	Cardia	NA	NA	NA	ASIAN	NA	NA	NA	1	3	FuJian	Not
NO497220	F	67	intestinal	II	Poor	Cardia	NA	NA	NA	ASIAN	NA	NA	NA	1	25	FuJian	Not
NO509159	F	76	diffuse	IV	Well	Cardia	NA	NA	NA	ASIAN	NA	NA	NA	1	4.8	FuJian	Not
NO515821	M	59	mixed	IV	Poor	Cardia	NA	NA	NA	ASIAN	NA	NA	NA	1	5	FuJian	Not
NO541553	M	63	mixed	III	Poor	Cardia	NA	NA	NA	ASIAN	NA	NA	NA	0	36	FuJian	Not
NO546676	M	55	diffuse	III	Poor	Body	NA	NA	NA	ASIAN	NA	NA	NA	1	22	FuJian	Not
NO548893	F	66	intestinal	III	Poor	Body	NA	NA	NA	ASIAN	NA	NA	NA	1	7	FuJian	Not
NO561062	M	63	intestinal	II	Well	Antrum	NA	NA	NA	ASIAN	NA	NA	NA	0	72	FuJian	Not
NO561154	F	57	diffuse	III	Poor	Body	NA	NA	NA	ASIAN	NA	NA	NA	1	4	FuJian	Not
NO563659	M	64	intestinal	IV	Poor	Cardia	NA	NA	NA	ASIAN	NA	NA	NA	1	7.5	FuJian	Not
NO573713	M	68	intestinal	II	Poor	Antrum	NA	NA	NA	ASIAN	NA	NA	NA	1	5	FuJian	Peritoneal Metastasis
NO581835	M	65	diffuse	III	Well	Body	NA	NA	NA	ASIAN	NA	NA	NA	1	59	FuJian	Not
NO582868	F	34	diffuse	III	Poor	Antrum	NA	NA	NA	ASIAN	NA	NA	NA	1	16	FuJian	Not
NO583692	M	55	intestinal	II	Poor	Cardia	NA	NA	NA	ASIAN	NA	NA	NA	0	66	FuJian	Not
NO587210	M	78	diffuse	III	NA	Cardia	NA	NA	NA	ASIAN	NA	NA	NA	0	65	FuJian	Not
NO587411	M	73	intestinal	III	Well	Cardia	NA	NA	NA	ASIAN	NA	NA	NA	0	50	FuJian	Not
NO588686	M	70	mixed	I	Poor	Body	NA	NA	NA	ASIAN	NA	NA	NA	0	66	FuJian	Not
NO591240	F	57	diffuse	IV	Poor	Body	NA	NA	NA	ASIAN	NA	NA	NA	1	14.5	FuJian	Peritoneal Metastasis
NO592779	M	67	intestinal	III	Well	Body	NA	NA	NA	ASIAN	NA	NA	NA	0	27	FuJian	Not
NO593948	M	54	intestinal	III	Poor	Cardia	NA	NA	NA	ASIAN	NA	NA	NA	1	8	FuJian	Not
NO593984	M	71	intestinal	III	Well	Cardia	NA	NA	NA	ASIAN	NA	NA	NA	1	11	FuJian	Not
NO596748	M	58	mixed	III	Well	Cardia	NA	NA	NA	ASIAN	NA	NA	NA	1	10	FuJian	Not
NO597153	M	53	NA	III	Poor	Body	NA	NA	NA	ASIAN	NA	NA	NA	1	6.25	FuJian	Not
NO599280	M	59	intestinal	I	Well	Body	NA	NA	NA	ASIAN	NA	NA	NA	0	64	FuJian	Not
NO602193	M	73	diffuse	III	Poor	Antrum	NA	NA	NA	ASIAN	NA	NA	NA	1	8	FuJian	Peritoneal Metastasis
NO616227	M	73	mixed	III	Poor	Body	NA	NA	NA	ASIAN	NA	NA	NA	1	10	FuJian	Peritoneal Metastasis
NO660447	F	61	diffuse	I	Poor	Body	NA	NA	NA	ASIAN	NA	NA	NA	0	60	FuJian	Not
NO660970	M	71	diffuse	III	Poor	Body	NA	NA	NA	ASIAN	NA	NA	NA	1	27	FuJian	Peritoneal Metastasis
NO661700	F	67	intestinal	III	Well	Cardia	NA	NA	NA	ASIAN	NA	NA	NA	1	15	FuJian	Not
NO661905	F	47	intestinal	III	Well	Body	NA	NA	NA	ASIAN	NA	NA	NA	1	22	FuJian	Peritoneal Metastasis
NO670704	M	63	diffuse	III	Poor	Cardia	NA	NA	NA	ASIAN	NA	NA	NA	1	9.25	FuJian	Peritoneal Metastasis
NO671858	F	57	diffuse	IV	Poor	Body	NA	NA	NA	ASIAN	NA	NA	NA	1	35	FuJian	Peritoneal Metastasis
NO672056	M	85	intestinal	III	NA	Body	NA	NA	NA	ASIAN	NA	NA	NA	1	50	FuJian	Not
NO672271	M	68	intestinal	III	Well	Antrum	NA	NA	NA	ASIAN	NA	NA	NA	1	30	FuJian	Peritoneal Metastasis
NO672561	M	40	mixed	III	Poor	Body	NA	NA	NA	ASIAN	NA	NA	NA	1	3	FuJian	Not
NO674592	M	50	diffuse	III	Poor	Antrum	NA	NA	NA	ASIAN	NA	NA	NA	1	7	FuJian	Not
NO675242	F	59	mixed	III	Poor	Cardia	NA	NA	NA	ASIAN	NA	NA	NA	1	13.25	FuJian	Not
NO675798	M	52	intestinal	I	Well	Body	NA	NA	NA	ASIAN	NA	NA	NA	0	56	FuJian	Not
NO676726	M	59	diffuse	III	Well	Body	NA	NA	NA	ASIAN	NA	NA	NA	0	55	FuJian	Not
NO676745	M	75	diffuse	III	Poor	Body	NA	NA	NA	ASIAN	NA	NA	NA	1	13	FuJian	Not
NO678167	M	79	diffuse	III	Poor	Antrum	NA	NA	NA	ASIAN	NA	NA	NA	1	35	FuJian	Peritoneal Metastasis
NO679820	M	62	diffuse	III	Poor	Antrum	NA	NA	NA	ASIAN	NA	NA	NA	1	47	FuJian	Not
NO681238	F	63	intestinal	II	Poor	Cardia	NA	NA	NA	ASIAN	NA	NA	NA	0	55	FuJian	Not
NO683001	M	62	intestinal	III	Poor	Body	NA	NA	NA	ASIAN	NA	NA	NA	1	29	FuJian	Not
NO684074	M	52	diffuse	III	Poor	Antrum	NA	NA	NA	ASIAN	NA	NA	NA	1	8.25	FuJian	Peritoneal Metastasis
NO685208	M	72	intestinal	III	Poor	Cardia	NA	NA	NA	ASIAN	NA	NA	NA	1	10	FuJian	Not
NO685372	M	61	intestinal	III	Poor	Antrum	NA	NA	NA	ASIAN	NA	NA	NA	1	7	FuJian	Peritoneal Metastasis
NO686709	F	53	intestinal	III	Well	Cardia	NA	NA	NA	ASIAN	NA	NA	NA	1	20	FuJian	Peritoneal Metastasis
NO688742	M	60	diffuse	III	Poor	Diffuse	NA	NA	NA	ASIAN	NA	NA	NA	1	7	FuJian	Not
NO689736	M	65	diffuse	III	Poor	Antrum	NA	NA	NA	ASIAN	NA	NA	NA	1	41	FuJian	Peritoneal Metastasis
NO692485	M	54	mixed	III	Poor	Diffuse	NA	NA	NA	ASIAN	NA	NA	NA	1	21	FuJian	Peritoneal Metastasis
NO695093	F	70	intestinal	III	Well	Antrum	NA	NA	NA	ASIAN	NA	NA	NA	1	3.5	FuJian	Not
NO695141	F	32	intestinal	IV	Poor	Body	NA	NA	NA	ASIAN	NA	NA	NA	1	1	FuJian	Peritoneal Metastasis
NO698199	M	59	diffuse	III	Poor	Body	NA	NA	NA	ASIAN	NA	NA	NA	1	10.5	FuJian	Peritoneal Metastasis
NO698505	M	55	intestinal	III	Poor	Body	NA	NA	NA	ASIAN	NA	NA	NA	1	15	FuJian	Not
NO701534	M	71	diffuse	III	Poor	Cardia	NA	NA	NA	ASIAN	NA	NA	NA	0	48	FuJian	Not
NO702241	F	85	NA	I	Well	Cardia	NA	NA	NA	ASIAN	NA	NA	NA	0	50	FuJian	Not
NO704023	M	75	intestinal	I	Well	Cardia	NA	NA	NA	ASIAN	NA	NA	NA	0	48	FuJian	Not
NO706839	M	70	mixed	III	Poor	Cardia	NA	NA	NA	ASIAN	NA	NA	NA	1	13	FuJian	Peritoneal Metastasis
NO713480	M	70	diffuse	III	Poor	Antrum	NA	NA	NA	ASIAN	NA	NA	NA	1	19	FuJian	Not
NO715051	M	66	mixed	III	Poor	Antrum	NA	NA	NA	ASIAN	NA	NA	NA	1	1	FuJian	Not
NO716302	F	35	diffuse	III	Poor	Diffuse	NA	NA	NA	ASIAN	NA	NA	NA	1	17	FuJian	Peritoneal Metastasis
NO718568	M	58	intestinal	III	Poor	Antrum	NA	NA	NA	ASIAN	NA	NA	NA	1	24	FuJian	Peritoneal Metastasis
NO719047	M	68	intestinal	III	Well	Diffuse	NA	NA	NA	ASIAN	NA	NA	NA	1	1	FuJian	Not
NO722013	F	71	intestinal	II	Well	Antrum	NA	NA	NA	ASIAN	NA	NA	NA	0	45	FuJian	Not
NO723406	F	74	diffuse	I	Poor	Body	NA	NA	NA	ASIAN	NA	NA	NA	0	44	FuJian	Not
TCGA-3M-AB46	M	70	NA	I	NA	NA	NA	NO	MSS	WHITE	G2	0	58.8333	0	58.8333	TCGA	NA
TCGA-3M-AB47	M	51	NA	III	NA	NA	NA	NO	MSI-L	WHITE	G3	1	NA	1	13.1667	TCGA	Locoregional Recurrence
TCGA-B7-5816	F	51	diffuse	II	NA	Body	NA	NA	MSI-H	WHITE	G3	0	27.0667	0	27.0667	TCGA	NA
TCGA-B7-5818	M	62	diffuse	I	NA	Body	NA	NA	MSI-L	WHITE	G3	0	11.8667	0	11.8667	TCGA	NA
TCGA-B7-A5TI	M	52	diffuse	III	NA	Body	NA	YES	MSI-H	WHITE	G3	0	19.8333	0	19.8333	TCGA	NA
TCGA-B7-A5TJ	M	74	intestinal	II	NA	Body	NA	YES	MSI-H	WHITE	G1	0	11.1667	0	11.1667	TCGA	NA
TCGA-B7-A5TK	M	51	intestinal	III	NA	NA	NA	YES	MSS	WHITE	G3	0	9.6	0	9.6	TCGA	NA
TCGA-B7-A5TN	M	60	NA	II	NA	Body	NA	YES	MSS	WHITE	G2	0	9.56667	0	9.56667	TCGA	NA
TCGA-BR-4183	F	55	NA	III	NA	Cardia	NA	NA	MSS	WHITE	G3	1	6.7	0	6.7	TCGA	NA
TCGA-BR-4184	M	70	NA	III	NA	Antrum	NA	NA	MSI-H	WHITE	G2	1	7.06667	0	7.06667	TCGA	NA
TCGA-BR-4187	M	56	NA	NA	NA	Antrum	NA	NA	MSS	WHITE	G3	1	4.7	0	4.7	TCGA	NA
TCGA-BR-4188	F	53	NA	NA	NA	Cardia	NA	NA	MSI-L	WHITE	G3	1	7.53333	0	7.53333	TCGA	NA
TCGA-BR-4191	M	72	NA	NA	NA	NA	NA	NA	MSS	WHITE	G2	1	18.6	0	18.6	TCGA	NA
TCGA-BR-4201	F	66	NA	NA	NA	Cardia	NA	NA	MSI-H	WHITE	G1	1	31.3333	0	31.3333	TCGA	NA
TCGA-BR-4253	F	80	NA	III	NA	Body	NA	NA	MSS	WHITE	G3	1	4.13333	0	4.13333	TCGA	NA
TCGA-BR-4255	F	76	NA	III	NA	NA	NA	NA	MSS	WHITE	G3	1	4.13333	0	4.13333	TCGA	NA
TCGA-BR-4256	M	80	NA	NA	NA	Antrum	NA	NA	MSI-H	WHITE	G2	1	9.46667	0	9.46667	TCGA	NA
TCGA-BR-4257	F	79	NA	NA	NA	Antrum	NA	NA	MSI-H	WHITE	G2	1	9.8	0	9.8	TCGA	NA
TCGA-BR-4267	M	51	NA	I	NA	NA	NA	NA	MSS	WHITE	G2	1	6.26667	0	6.26667	TCGA	NA
TCGA-BR-4279	M	43	NA	II	NA	NA	NA	NA	MSS	WHITE	G3	1	9.7	0	9.7	TCGA	NA
TCGA-BR-4280	F	78	NA	III	NA	NA	NA	NA	MSI-H	WHITE	G2	1	6.7	0	6.7	TCGA	NA
TCGA-BR-4292	F	73	NA	NA	NA	Body	NA	NA	MSI-H	WHITE	G1	0	0	0	0	TCGA	NA
TCGA-BR-4294	M	65	intestinal	NA	NA	Body	NA	NA	MSI-L	WHITE	G2	0	0	0	0	TCGA	NA
TCGA-BR-4357	M	58	NA	NA	NA	Body	NA	NA	MSS	WHITE	G2	0	0	0	0	TCGA	NA
TCGA-BR-4361	F	66	NA	III	NA	NA	NA	NA	MSI-H	WHITE	G3	0	0	0	0	TCGA	NA
TCGA-BR-4362	F	74	NA	NA	NA	NA	NA	NA	MSI-H	WHITE	G3	0	0	0	0	TCGA	NA
TCGA-BR-4363	F	60	NA	NA	NA	Body	NA	NA	MSI-H	WHITE	G3	0	0	0	0	TCGA	NA
TCGA-BR-4366	M	87	NA	NA	NA	Antrum	NA	NA	MSS	WHITE	G2	0	0	0	0	TCGA	NA
TCGA-BR-4367	M	78	NA	NA	NA	Antrum	NA	NA	MSS	WHITE	G3	0	0	0	0	TCGA	NA
TCGA-BR-4368	F	78	NA	IV	NA	Antrum	NA	NA	MSI-H	WHITE	G3	0	0	0	0	TCGA	NA
TCGA-BR-4369	M	75	NA	NA	NA	Cardia	NA	NA	MSS	WHITE	G3	0	0	0	0	TCGA	NA
TCGA-BR-4370	F	74	NA	NA	NA	Antrum	NA	NA	MSI-H	WHITE	G2	0	0	0	0	TCGA	NA
TCGA-BR-4371	F	71	NA	NA	NA	NA	NA	NA	MSS	WHITE	G1	0	0	0	0	TCGA	NA
TCGA-BR-6452	F	78	NA	II	NA	Body	NA	NA	MSI-H	WHITE	G3	0	35.1667	0	35.1667	TCGA	NA
TCGA-BR-6453	M	54	NA	II	NA	Body	NA	NA	MSS	WHITE	G3	0	16.1667	0	16.1667	TCGA	NA
TCGA-BR-6454	M	58	NA	II	NA	Cardia	NA	NA	MSS	WHITE	G3	0	0	0	0	TCGA	NA
TCGA-BR-6455	M	59	NA	II	NA	Body	NA	NA	MSS	WHITE	G3	1	14.0667	1	12.8333	TCGA	Distant Metastasis
TCGA-BR-6456	F	74	NA	II	NA	Body	NA	NA	MSS	WHITE	G2	1	17.5333	0	17.5333	TCGA	NA
TCGA-BR-6457	M	69	NA	II	NA	Body	NA	NA	MSS	WHITE	G3	0	13.8667	0	13.8667	TCGA	NA
TCGA-BR-6458	F	57	NA	II	NA	Body	NA	NA	MSI-L	WHITE	G3	1	19.6	1	19.1333	TCGA	Distant Metastasis
TCGA-BR-6563	M	60	NA	II	NA	Antrum	NA	NA	MSS	WHITE	G3	0	39.6667	1	4.93333	TCGA	New Primary Tumor
TCGA-BR-6564	F	46	diffuse	III	NA	Body	NA	NA	MSS	WHITE	G3	1	26.4667	0	26.4667	TCGA	NA
TCGA-BR-6565	M	67	NA	II	NA	Body	NA	NA	MSS	WHITE	G2	1	9.3	1	9.3	TCGA	NA
TCGA-BR-6566	F	64	NA	II	NA	Body	NA	NA	MSI-H	WHITE	G3	0	33.2333	0	33.2333	TCGA	NA
TCGA-BR-6705	F	68	NA	III	NA	Body	NA	NA	MSI-L	WHITE	G3	1	25.9667	1	25.9667	TCGA	NA
TCGA-BR-6706	M	63	NA	III	NA	Cardia	NA	NA	MSS	WHITE	G3	1	18.3	1	13.4	TCGA	Locoregional Recurrence
TCGA-BR-6707	M	75	NA	II	NA	Body	NA	NA	MSS	WHITE	G3	0	16.3667	1	14.2	TCGA	Locoregional Recurrence
TCGA-BR-6709	F	57	NA	III	NA	Cardia	NA	NA	MSS	WHITE	G3	1	12.3333	1	12.3333	TCGA	NA
TCGA-BR-6710	M	41	NA	I	NA	Gastroesophageal Junction	NA	NA	MSS	WHITE	G2	0	9.1	0	9.1	TCGA	NA
TCGA-BR-6801	M	70	NA	II	NA	Body	NA	NA	MSI-L	WHITE	G2	0	40.7667	0	40.7667	TCGA	NA
TCGA-BR-6802	M	65	NA	III	NA	Body	NA	NA	MSI-H	WHITE	G3	0	31.3333	1	26.9	TCGA	Distant Metastasis
TCGA-BR-6803	F	54	diffuse	II	NA	Body	NA	NA	MSS	WHITE	G3	0	31.6333	0	31.6333	TCGA	NA
TCGA-BR-6852	F	64	NA	II	NA	Gastroesophageal Junction	NA	NA	MSI-H	WHITE	G3	0	45.5667	0	45.5667	TCGA	NA
TCGA-BR-7196	M	64	NA	IV	NA	Cardia	NA	NA	MSS	WHITE	G3	0	22.2	1	11.6	TCGA	Distant Metastasis
TCGA-BR-7197	M	69	NA	II	NA	Antrum	NA	NA	MSS	WHITE	GX	0	9.33333	0	9.33333	TCGA	NA
TCGA-BR-7703	M	81	intestinal	I	NA	Body	NA	NA	MSI-H	WHITE	G2	0	36.6667	0	36.6667	TCGA	NA
TCGA-BR-7704	F	69	intestinal	II	NA	Body	NA	NA	MSS	WHITE	G3	0	35.7333	0	35.7333	TCGA	NA
TCGA-BR-7707	F	69	NA	I	NA	Body	NA	NA	MSI-H	WHITE	G3	0	36.3333	0	36.3333	TCGA	NA
TCGA-BR-7715	M	65	NA	II	NA	Body	NA	NA	MSS	WHITE	G2	0	34.1	0	34.1	TCGA	NA
TCGA-BR-7716	F	62	NA	II	NA	Body	NA	NA	MSS	WHITE	G2	0	40.3333	0	40.3333	TCGA	NA
TCGA-BR-7717	M	63	NA	IV	NA	Cardia	NA	NA	MSS	WHITE	G2	1	18.4	0	18.4	TCGA	NA
TCGA-BR-7722	M	62	NA	II	NA	Gastroesophageal Junction	NA	NA	MSS	WHITE	G3	1	15.5333	0	15.5333	TCGA	NA
TCGA-BR-7723	M	59	NA	III	NA	Body	NA	NA	MSI-L	WHITE	G3	1	29.1333	1	18.6333	TCGA	Distant Metastasis
TCGA-BR-7851	M	74	intestinal	II	NA	Body	NA	NA	MSI-H	WHITE	G3	1	NA	0	NA	TCGA	NA
TCGA-BR-7901	M	74	NA	II	NA	Gastroesophageal Junction	NA	NA	MSS	WHITE	G2	1	3.5	1	3.03333	TCGA	Locoregional Recurrence
TCGA-BR-7957	F	50	intestinal	IV	NA	Body	NA	NA	MSS	WHITE	GX	1	9.2	0	9.2	TCGA	NA
TCGA-BR-7958	M	60	NA	III	NA	Body	NA	NA	MSS	WHITE	G3	0	29.9667	0	29.9667	TCGA	NA
TCGA-BR-7959	M	59	intestinal	III	NA	Cardia	NA	NA	MSI-L	WHITE	G3	0	33.6667	0	33.6667	TCGA	NA
TCGA-BR-8058	F	53	NA	III	NA	Antrum	NA	NA	MSI-L	WHITE	G3	0	37.7667	1	2.96667	TCGA	New Primary Tumor
TCGA-BR-8059	M	72	intestinal	III	NA	Body	NA	NA	MSI-H	WHITE	G3	1	14.6333	0	14.6333	TCGA	NA
TCGA-BR-8060	F	75	NA	II	NA	Cardia	NA	NA	MSS	WHITE	G3	1	11.6	0	11.6	TCGA	NA
TCGA-BR-8077	F	58	intestinal	III	NA	Body	NA	NA	MSS	WHITE	G2	0	0.7	0	0.7	TCGA	NA
TCGA-BR-8078	F	70	NA	II	NA	Body	NA	NA	MSI-H	WHITE	G3	0	30	0	30	TCGA	NA
TCGA-BR-8080	F	72	intestinal	III	NA	Body	NA	NA	MSS	WHITE	G3	1	9.73333	0	9.73333	TCGA	NA
TCGA-BR-8081	F	71	NA	II	NA	Body	NA	NA	MSI-H	WHITE	G2	0	32.7	0	32.7	TCGA	NA
TCGA-BR-8284	F	72	intestinal	III	NA	Antrum	NA	NA	MSI-H	WHITE	G3	1	8.16667	0	8.16667	TCGA	NA
TCGA-BR-8285	F	57	intestinal	III	NA	Body	NA	NA	MSS	WHITE	G3	1	0.566667	0	0.566667	TCGA	NA
TCGA-BR-8286	M	49	NA	II	NA	Antrum	NA	NA	MSI-L	WHITE	G3	0	29.8333	0	29.8333	TCGA	NA
TCGA-BR-8289	M	57	intestinal	IV	NA	Body	NA	NA	MSS	WHITE	G3	1	2.7	0	2.7	TCGA	NA
TCGA-BR-8291	M	61	diffuse	II	NA	Antrum	NA	NA	MSS	WHITE	GX	1	20.2333	0	20.2333	TCGA	NA
TCGA-BR-8295	F	60	NA	II	NA	Body	NA	NA	MSI-L	WHITE	G3	1	2.23333	1	2.23333	TCGA	NA
TCGA-BR-8296	F	58	intestinal	III	NA	Body	NA	NA	MSS	WHITE	G3	1	15.8	1	13	TCGA	Distant Metastasis
TCGA-BR-8297	M	58	diffuse	III	NA	Body	NA	NA	MSS	WHITE	GX	0	7.5	0	7.5	TCGA	NA
TCGA-BR-8360	M	66	intestinal	II	NA	Body	NA	NA	MSI-H	WHITE	G2	0	6.26667	0	6.26667	TCGA	NA
TCGA-BR-8361	F	71	NA	III	NA	Body	NA	NA	MSI-H	WHITE	G3	0	31.5333	0	31.5333	TCGA	NA
TCGA-BR-8362	M	65	NA	III	NA	Body	NA	NA	MSS	WHITE	G3	1	13.2667	1	11.8667	TCGA	Distant Metastasis
TCGA-BR-8363	F	73	NA	I	NA	Antrum	NA	NA	MSI-H	WHITE	G3	1	0.266667	0	0.266667	TCGA	NA
TCGA-BR-8364	F	42	diffuse	III	NA	Body	NA	NA	MSS	WHITE	G3	0	22.5	0	22.5	TCGA	NA
TCGA-BR-8365	F	70	NA	II	NA	Body	NA	NA	MSS	WHITE	G3	1	17.7667	1	17.7667	TCGA	NA
TCGA-BR-8366	F	80	NA	II	NA	Body	NA	NA	MSS	WHITE	G3	0	0.966667	0	0.966667	TCGA	NA
TCGA-BR-8367	M	55	NA	III	NA	Body	NA	NA	MSS	WHITE	G3	1	26.7	1	19.3333	TCGA	Distant Metastasis
TCGA-BR-8368	F	84	NA	I	NA	Body	NA	NA	MSI-H	WHITE	G3	0	4.36667	0	4.36667	TCGA	NA
TCGA-BR-8369	F	76	NA	III	NA	Antrum	NA	NA	MSS	WHITE	G3	0	14.2333	1	13.9667	TCGA	Distant Metastasis
TCGA-BR-8370	M	64	diffuse	III	NA	Cardia	NA	NA	MSI-L	WHITE	G3	0	3.36667	0	3.36667	TCGA	NA
TCGA-BR-8371	M	62	NA	III	NA	Cardia	NA	NA	MSS	WHITE	G3	1	11.9667	1	11.9	TCGA	Distant Metastasis
TCGA-BR-8372	M	63	NA	III	NA	Body	NA	NA	MSI-H	WHITE	G3	0	31.7	0	31.7	TCGA	NA
TCGA-BR-8373	F	65	intestinal	III	NA	Body	NA	NA	MSI-L	WHITE	G2	0	15	0	15	TCGA	NA
TCGA-BR-8380	M	55	NA	III	NA	Antrum	NA	NA	MSI-L	WHITE	G3	0	0.7	1	15.5667	TCGA	Locoregional Recurrence
TCGA-BR-8381	M	51	NA	II	NA	Body	NA	NA	MSS	WHITE	G3	0	7.46667	0	7.46667	TCGA	NA
TCGA-BR-8382	F	67	NA	III	NA	Antrum	NA	NA	MSI-H	WHITE	G3	1	25.4	0	25.4	TCGA	NA
TCGA-BR-8384	M	69	NA	III	NA	Antrum	NA	NA	MSS	WHITE	G3	0	3.76667	0	3.76667	TCGA	NA
TCGA-BR-8483	M	59	intestinal	III	NA	Antrum	NA	NA	MSS	WHITE	G2	0	5.46667	0	5.46667	TCGA	NA
TCGA-BR-8484	M	61	NA	III	NA	Body	NA	NA	MSS	WHITE	G2	1	25.5333	0	25.5333	TCGA	NA
TCGA-BR-8485	F	68	NA	III	NA	Body	NA	NA	MSS	WHITE	G3	0	9.33333	0	9.33333	TCGA	NA
TCGA-BR-8486	F	90	NA	I	NA	Body	NA	NA	MSS	WHITE	G2	0	20.5	0	20.5	TCGA	NA
TCGA-BR-8487	F	64	NA	II	NA	Antrum	NA	NA	MSI-H	WHITE	G3	0	1.13333	0	1.13333	TCGA	NA
TCGA-BR-8588	F	55	NA	II	NA	Body	NA	NA	MSS	WHITE	G3	0	12.9667	0	12.9667	TCGA	NA
TCGA-BR-8589	M	56	NA	III	NA	Body	NA	NA	MSS	WHITE	G3	0	27.5	0	27.5	TCGA	NA
TCGA-BR-8590	M	62	NA	III	NA	Body	NA	NA	MSS	WHITE	G3	1	9.46667	1	7.43333	TCGA	Distant Metastasis
TCGA-BR-8591	M	79	NA	III	NA	Antrum	NA	NA	MSI-H	WHITE	G3	0	28.5333	0	28.5333	TCGA	NA
TCGA-BR-8592	F	63	diffuse	III	NA	Body	NA	NA	MSS	WHITE	G3	1	6.36667	0	6.36667	TCGA	NA
TCGA-BR-8676	M	59	intestinal	III	NA	Antrum	NA	NA	MSS	WHITE	G3	0	7.63333	0	7.63333	TCGA	NA
TCGA-BR-8677	F	74	NA	III	NA	Antrum	NA	NA	MSS	WHITE	G3	0	27.1	0	27.1	TCGA	NA
TCGA-BR-8678	M	76	NA	I	NA	Body	NA	NA	MSS	WHITE	G2	0	25.1333	0	25.1333	TCGA	NA
TCGA-BR-8679	F	63	NA	I	NA	Body	NA	NA	MSI-L	WHITE	G2	0	0	0	0	TCGA	NA
TCGA-BR-8680	M	45	intestinal	IV	NA	Antrum	NA	NA	MSS	ASIAN	G2	0	32.4	0	32.4	TCGA	NA
TCGA-BR-8682	M	52	intestinal	II	NA	Antrum	NA	NO	MSS	ASIAN	G3	0	33.0333	0	33.0333	TCGA	NA
TCGA-BR-8683	M	75	intestinal	III	NA	Antrum	NA	NA	MSI-L	ASIAN	G3	1	10	0	10	TCGA	NA
TCGA-BR-8686	M	69	intestinal	III	NA	Antrum	NA	NA	MSS	ASIAN	G3	1	21.1667	0	21.1667	TCGA	NA
TCGA-BR-8687	F	67	NA	III	NA	Cardia	NA	NA	MSS	WHITE	G3	1	8.33333	1	8.33333	TCGA	NA
TCGA-BR-8690	F	54	NA	III	NA	Cardia	NA	NA	MSI-L	WHITE	G2	0	10.8333	0	10.8333	TCGA	NA
TCGA-BR-A44T	F	53	diffuse	II	NA	Cardia	NA	NA	MSS	WHITE	G3	0	34.6	1	22.7333	TCGA	Locoregional Recurrence
TCGA-BR-A44U	M	70	NA	III	NA	Antrum	NA	NA	MSS	WHITE	G3	1	14.0667	0	14.0667	TCGA	NA
TCGA-BR-A452	M	57	intestinal	III	NA	Antrum	NA	NA	MSS	ASIAN	G3	1	7.63333	0	7.63333	TCGA	NA
TCGA-BR-A453	M	51	NA	IV	NA	Antrum	NA	NA	MSS	ASIAN	G3	1	6.16667	0	6.16667	TCGA	NA
TCGA-BR-A4CQ	M	58	NA	III	NA	Cardia	NA	NA	MSS	WHITE	G3	0	35.4667	1	32.0667	TCGA	Distant Metastasis
TCGA-BR-A4CR	F	70	NA	III	NA	Body	NA	NA	MSS	WHITE	G3	0	0	0	0	TCGA	NA
TCGA-BR-A4CS	M	77	NA	III	NA	Body	NA	NA	MSS	WHITE	G3	1	1.5	0	1.5	TCGA	NA
TCGA-BR-A4IU	F	34	diffuse	III	NA	Antrum	NA	NA	MSS	ASIAN	G3	0	27.9333	0	27.9333	TCGA	NA
TCGA-BR-A4IV	M	47	diffuse	III	NA	Antrum	NA	NA	MSS	ASIAN	G3	1	28.9667	1	24.5667	TCGA	Locoregional Recurrence
TCGA-BR-A4IY	M	58	NA	II	NA	Antrum	NA	NA	MSS	ASIAN	G3	0	13.0667	0	13.0667	TCGA	NA
TCGA-BR-A4IZ	F	45	diffuse	III	NA	Antrum	NA	NA	MSS	ASIAN	G3	1	9.1	0	9.1	TCGA	NA
TCGA-BR-A4J1	M	63	NA	III	NA	Antrum	NA	NA	MSS	ASIAN	G3	1	0.733333	0	0.733333	TCGA	NA
TCGA-BR-A4J2	M	70	diffuse	II	NA	Antrum	NA	NA	MSS	ASIAN	G3	0	14.3667	0	14.3667	TCGA	NA
TCGA-BR-A4J4	M	39	NA	III	NA	Antrum	NA	NA	MSI-L	ASIAN	G3	0	0.533333	0	0.533333	TCGA	NA
TCGA-BR-A4J5	M	56	intestinal	III	NA	Antrum	NA	NA	MSS	ASIAN	G3	0	28.7333	0	28.7333	TCGA	NA
TCGA-BR-A4J6	F	69	NA	II	NA	Cardia	NA	NA	MSS	WHITE	G2	0	0.666667	0	0.666667	TCGA	NA
TCGA-BR-A4J7	M	49	intestinal	II	NA	Antrum	NA	NA	MSS	ASIAN	G3	0	32.9667	0	32.9667	TCGA	NA
TCGA-BR-A4J8	F	71	NA	III	NA	Cardia	NA	NA	MSS	WHITE	G3	0	13.7	0	13.7	TCGA	NA
TCGA-BR-A4J9	M	55	NA	II	NA	Antrum	NA	NA	MSS	WHITE	G3	0	0.466667	0	0.466667	TCGA	NA
TCGA-BR-A4PD	F	72	NA	II	NA	Body	NA	NA	MSS	WHITE	G3	0	20.9333	0	20.9333	TCGA	NA
TCGA-BR-A4PE	F	68	NA	I	NA	Cardia	NA	NA	MSS	WHITE	G2	0	20.7	0	20.7	TCGA	NA
TCGA-BR-A4PF	M	72	NA	III	NA	Antrum	NA	NA	MSS	WHITE	G3	0	1.16667	0	1.16667	TCGA	NA
TCGA-BR-A4QI	F	70	NA	II	NA	Antrum	NA	NO	MSS	WHITE	G3	1	21.7333	1	12.7667	TCGA	Distant Metastasis
TCGA-BR-A4QL	F	75	NA	III	NA	Antrum	NA	NO	MSI-H	WHITE	G2	1	16.3667	0	16.3667	TCGA	NA
TCGA-BR-A4QM	M	65	NA	III	NA	Cardia	NA	NO	MSS	WHITE	G3	0	5.2	1	4.23333	TCGA	Locoregional Recurrence
TCGA-CD-5798	M	82	intestinal	II	NA	Antrum	NA	NA	MSS	ASIAN	G2	0	13.6	0	13.6	TCGA	NA
TCGA-CD-5799	M	45	intestinal	II	NA	Antrum	NA	NA	MSS	ASIAN	G3	0	13.2	0	13.2	TCGA	NA
TCGA-CD-5800	F	51	intestinal	II	NA	Antrum	NA	NA	MSS	ASIAN	G1	0	13.3333	0	13.3333	TCGA	NA
TCGA-CD-5801	M	69	NA	III	NA	Antrum	NA	NA	MSS	ASIAN	G3	1	13.3667	1	13.3667	TCGA	NA
TCGA-CD-5802	M	58	NA	II	NA	Cardia	NA	NA	MSS	ASIAN	G2	0	13.5333	0	13.5333	TCGA	NA
TCGA-CD-5803	F	78	NA	II	NA	Antrum	NA	NA	MSS	ASIAN	G3	1	11.3667	1	10	TCGA	Distant Metastasis
TCGA-CD-5804	M	90	NA	NA	NA	Antrum	NA	NO	MSS	ASIAN	G2	0	12.2667	0	12.2667	TCGA	NA
TCGA-CD-5813	M	60	intestinal	II	NA	Body	NA	NA	MSS	ASIAN	G3	1	12.5667	1	10.5	TCGA	Distant Metastasis
TCGA-CD-8524	F	61	intestinal	II	NA	Antrum	NA	NA	MSI-L	ASIAN	G3	0	12.9333	1	2.3	TCGA	Locoregional Recurrence
TCGA-CD-8525	F	82	intestinal	III	NA	Antrum	NA	NA	MSS	ASIAN	G3	0	12.7667	0	12.7667	TCGA	NA
TCGA-CD-8526	F	73	intestinal	III	NA	Body	NA	NA	MSS	ASIAN	G3	0	12.7	0	12.7	TCGA	NA
TCGA-CD-8527	F	72	intestinal	II	NA	Antrum	NA	NA	MSI-L	ASIAN	G2	1	7.26667	1	5.3	TCGA	Distant Metastasis
TCGA-CD-8528	F	43	NA	III	NA	Antrum	NA	NA	MSI-L	ASIAN	G3	0	12.5	0	12.5	TCGA	NA
TCGA-CD-8529	M	65	intestinal	IV	NA	Antrum	NA	NA	MSS	ASIAN	G2	0	12.4667	0	12.4667	TCGA	NA
TCGA-CD-8530	M	51	diffuse	II	NA	Body	NA	NA	MSS	ASIAN	G3	0	12.5667	0	12.5667	TCGA	NA
TCGA-CD-8531	F	66	diffuse	III	NA	Body	NA	NA	MSS	ASIAN	G3	0	12.7667	0	12.7667	TCGA	NA
TCGA-CD-8532	M	52	NA	II	NA	Cardia	NA	NA	MSS	ASIAN	G2	1	11.8	1	9.4	TCGA	Locoregional Recurrence
TCGA-CD-8533	M	48	NA	II	NA	Antrum	NA	NA	MSI-L	ASIAN	G3	0	15.6	1	7.53333	TCGA	Distant Metastasis
TCGA-CD-8534	M	41	diffuse	II	NA	Antrum	NA	NA	MSS	ASIAN	G3	0	12.2333	1	6.7	TCGA	Distant Metastasis
TCGA-CD-8535	M	59	NA	III	NA	Body	NA	NA	MSS	ASIAN	G3	0	13	0	13	TCGA	NA
TCGA-CD-8536	M	74	NA	II	NA	Body	NA	NA	MSI-H	ASIAN	G3	0	12.6	0	12.6	TCGA	NA
TCGA-CD-A486	M	68	NA	II	NA	Cardia	NA	NA	MSS	ASIAN	G2	1	6.4	1	2.63333	TCGA	Distant Metastasis
TCGA-CD-A487	M	51	diffuse	II	NA	Antrum	NA	NA	MSS	ASIAN	G3	0	12.4667	0	12.4667	TCGA	NA
TCGA-CD-A489	M	58	diffuse	II	NA	Antrum	NA	NA	MSS	ASIAN	G3	1	11.4667	1	9.23333	TCGA	Locoregional Recurrence
TCGA-CD-A48A	M	57	NA	II	NA	Cardia	NA	NA	MSI-L	ASIAN	G2	0	12.6	0	12.6	TCGA	NA
TCGA-CD-A48C	F	79	NA	II	NA	Antrum	NA	NA	MSS	ASIAN	G3	1	11.7667	1	7.66667	TCGA	Locoregional Recurrence
TCGA-CD-A4MG	M	76	diffuse	II	NA	Cardia	NA	NA	MSI-H	ASIAN	G3	1	6.66667	1	2.46667	TCGA	Locoregional Recurrence
TCGA-CD-A4MH	F	86	NA	II	NA	Antrum	NA	NA	MSS	ASIAN	G2	0	12.3667	0	12.3667	TCGA	NA
TCGA-CD-A4MI	M	62	NA	III	NA	Antrum	NA	NA	MSI-H	ASIAN	G1	1	11.9333	1	9.03333	TCGA	Locoregional Recurrence
TCGA-CD-A4MJ	M	60	NA	I	NA	Body	NA	NA	MSI-H	ASIAN	G2	0	12.8	1	2.3	TCGA	Locoregional Recurrence
TCGA-CG-4300	M	79	NA	III	NA	Antrum	NA	NA	MSS	NA	G2	1	20.3	0	20.3	TCGA	NA
TCGA-CG-4301	F	75	NA	IV	NA	Cardia	NA	NA	MSS	NA	G3	0	3.06667	0	3.06667	TCGA	NA
TCGA-CG-4304	M	84	NA	I	NA	Cardia	NA	NA	MSS	NA	G2	0	NA	0	NA	TCGA	NA
TCGA-CG-4305	M	69	NA	II	NA	Antrum	NA	NA	MSI-H	NA	G3	0	16.1667	1	15.2333	TCGA	NA
TCGA-CG-4306	M	90	NA	IV	NA	Antrum	NA	NA	MSI-H	NA	G3	1	1.03333	0	1.03333	TCGA	NA
TCGA-CG-4436	M	57	intestinal	I	NA	NA	NA	NA	MSI-L	NA	G2	0	8.1	0	8.1	TCGA	NA
TCGA-CG-4437	M	83	intestinal	II	NA	Cardia	NA	NA	MSI-L	NA	G2	0	8.16667	0	8.16667	TCGA	NA
TCGA-CG-4438	M	56	intestinal	IV	NA	Antrum	NA	NA	MSS	NA	G3	0	54.8333	0	54.8333	TCGA	NA
TCGA-CG-4440	F	68	intestinal	IV	NA	Body	NA	NA	MSI-L	NA	G3	1	4.06667	0	4.06667	TCGA	NA
TCGA-CG-4441	M	83	intestinal	III	NA	Body	NA	NA	MSS	NA	G2	1	14.2	0	14.2	TCGA	NA
TCGA-CG-4442	M	85	intestinal	I	NA	Antrum	NA	NA	MSI-H	NA	G3	0	0	0	0	TCGA	NA
TCGA-CG-4443	M	68	intestinal	I	NA	Body	NA	NA	MSS	NA	G2	0	30.4	0	30.4	TCGA	NA
TCGA-CG-4444	M	76	diffuse	III	NA	Body	NA	NA	MSS	NA	G3	0	47.7	0	47.7	TCGA	NA
TCGA-CG-4449	M	81	intestinal	II	NA	Antrum	NA	NA	MSI-L	NA	G2	0	19.3333	1	11.2	TCGA	NA
TCGA-CG-4455	M	72	intestinal	II	NA	Cardia	NA	NA	MSS	NA	G3	0	12.2	0	12.2	TCGA	NA
TCGA-CG-4460	F	66	intestinal	IV	NA	Body	NA	NA	MSI-H	NA	G2	1	22.3	1	16.2333	TCGA	NA
TCGA-CG-4462	F	72	diffuse	IV	NA	Antrum	NA	NA	MSS	NA	G3	1	0	1	0	TCGA	NA
TCGA-CG-4465	F	69	diffuse	IV	NA	Antrum	NA	NA	MSI-H	NA	G3	1	9.13333	0	9.13333	TCGA	NA
TCGA-CG-4466	F	81	intestinal	I	NA	Cardia	NA	NA	MSI-L	NA	G2	0	19.2333	0	19.2333	TCGA	NA
TCGA-CG-4469	M	70	intestinal	IV	NA	NA	NA	NA	MSI-L	NA	G3	1	7.16667	0	7.16667	TCGA	NA
TCGA-CG-4472	M	49	NA	IV	NA	Antrum	NA	NA	MSS	NA	G3	0	12.1667	1	4.06667	TCGA	NA
TCGA-CG-4474	F	67	diffuse	IV	NA	Antrum	NA	NA	MSS	NA	G3	0	0	0	0	TCGA	NA
TCGA-CG-4475	M	76	NA	II	NA	NA	NA	NA	MSS	NA	G3	0	23.3	0	23.3	TCGA	NA
TCGA-CG-4476	M	69	diffuse	III	NA	Body	NA	NA	MSS	NA	G3	0	0	0	0	TCGA	NA
TCGA-CG-4477	F	58	intestinal	I	NA	Cardia	NA	NA	MSS	NA	G3	0	31.4	1	12.1667	TCGA	NA
TCGA-CG-5716	M	86	NA	IV	NA	Antrum	NA	NA	MSS	NA	G2	0	0	0	0	TCGA	NA
TCGA-CG-5717	M	58	NA	II	NA	Cardia	NA	NO	MSS	NA	G3	1	7.06667	1	4	TCGA	NA
TCGA-CG-5718	F	78	intestinal	II	NA	Body	NA	YES	MSS	NA	G2	1	36.5	0	36.5	TCGA	NA
TCGA-CG-5719	F	54	intestinal	IV	NA	Body	NA	NA	MSS	NA	G1	0	1.03333	0	1.03333	TCGA	NA
TCGA-CG-5720	M	71	NA	I	NA	Cardia	NA	NA	MSI-L	NA	G3	1	1	0	1	TCGA	NA
TCGA-CG-5721	M	58	intestinal	IV	NA	Antrum	NA	YES	MSI-H	NA	G3	0	6.1	0	6.1	TCGA	NA
TCGA-CG-5722	F	67	intestinal	IV	NA	Body	NA	NA	MSS	NA	G3	0	1	0	1	TCGA	NA
TCGA-CG-5723	M	83	NA	II	NA	Cardia	NA	NA	MSI-H	NA	G3	0	106.533	0	106.533	TCGA	NA
TCGA-CG-5724	M	59	diffuse	IV	NA	Antrum	NA	NA	MSI-L	NA	G3	1	12.2	1	4.06667	TCGA	NA
TCGA-CG-5725	M	72	NA	I	NA	Cardia	NA	NO	MSS	NA	G3	1	15.2333	1	5.1	TCGA	NA
TCGA-CG-5726	M	73	intestinal	I	NA	Antrum	NA	NA	MSI-H	NA	G2	1	29.3667	0	29.3667	TCGA	NA
TCGA-CG-5727	M	66	intestinal	II	NA	Body	NA	NA	MSI-L	NA	G3	0	80.1667	0	80.1667	TCGA	NA
TCGA-CG-5728	F	88	intestinal	I	NA	Antrum	NA	NA	MSI-H	NA	G3	0	66	0	66	TCGA	NA
TCGA-CG-5730	F	80	intestinal	IV	NA	Cardia	NA	NA	MSS	NA	G2	0	4.06667	0	4.06667	TCGA	NA
TCGA-CG-5732	M	66	intestinal	IV	NA	Cardia	NA	NA	MSS	NA	G2	1	70	1	64.9667	TCGA	NA
TCGA-CG-5733	F	83	intestinal	III	NA	Antrum	NA	NA	MSI-H	NA	G3	1	21.3667	1	14.2333	TCGA	NA
TCGA-CG-5734	M	68	intestinal	III	NA	Body	NA	NA	MSI-L	NA	G3	1	8.1	0	8.1	TCGA	NA
TCGA-D7-5577	F	53	intestinal	III	NA	Cardia	NA	NO	MSS	WHITE	G2	1	26.0667	1	12.5333	TCGA	Locoregional Recurrence|Distant Metastasis
TCGA-D7-5578	M	80	intestinal	III	NA	Body	NA	NA	MSI-L	WHITE	G3	0	12.8333	0	12.8333	TCGA	NA
TCGA-D7-5579	M	74	intestinal	III	NA	Body	NA	NA	MSS	WHITE	G3	0	21.2	0	21.2	TCGA	NA
TCGA-D7-6518	M	75	diffuse	III	NA	Cardia	NA	NA	MSS	WHITE	G3	0	19.4	0	19.4	TCGA	NA
TCGA-D7-6519	F	64	diffuse	NA	NA	Cardia	NA	NO	MSS	WHITE	G3	0	20.8333	1	14.3	TCGA	Distant Metastasis
TCGA-D7-6520	M	53	intestinal	III	NA	Antrum	NA	NA	MSS	WHITE	G3	0	19.1	1	1.53333	TCGA	Distant Metastasis
TCGA-D7-6521	M	65	diffuse	NA	NA	Body	NA	NA	MSI-L	WHITE	G3	0	18.8	1	6.4	TCGA	Locoregional Recurrence
TCGA-D7-6522	M	58	diffuse	I	NA	Antrum	NA	NA	MSS	WHITE	G3	0	18.8667	0	18.8667	TCGA	NA
TCGA-D7-6524	M	53	diffuse	II	NA	Antrum	NA	NA	MSS	WHITE	G3	0	18.1	1	18.1	TCGA	Locoregional Recurrence
TCGA-D7-6525	M	58	diffuse	III	NA	Cardia	NA	NA	MSI-L	WHITE	G3	1	13.5333	1	5.7	TCGA	Distant Metastasis
TCGA-D7-6526	F	67	intestinal	III	NA	Body	NA	NA	MSS	WHITE	G2	0	17.4333	0	17.4333	TCGA	NA
TCGA-D7-6527	M	62	intestinal	II	NA	Cardia	NA	NA	MSI-L	WHITE	G2	1	10.4	1	2.5	TCGA	Distant Metastasis
TCGA-D7-6528	F	70	intestinal	I	NA	Body	NA	NA	MSI-L	WHITE	G2	0	15.4333	0	15.4333	TCGA	NA
TCGA-D7-6815	F	70	intestinal	II	NA	Body	NA	NO	MSS	WHITE	G2	0	16.2	0	16.2	TCGA	NA
TCGA-D7-6817	M	63	intestinal	III	NA	Body	NA	NO	MSS	WHITE	G3	0	12.9667	0	12.9667	TCGA	NA
TCGA-D7-6818	M	53	diffuse	III	NA	Body	NA	NO	MSS	WHITE	G3	1	12.5333	1	8.23333	TCGA	Locoregional Recurrence
TCGA-D7-6820	M	64	intestinal	II	NA	Body	NA	YES	MSS	WHITE	G2	0	11.4667	0	11.4667	TCGA	NA
TCGA-D7-6822	M	77	intestinal	I	NA	Body	NA	NO	MSS	WHITE	G2	0	12.5	0	12.5	TCGA	NA
TCGA-D7-8570	M	44	intestinal	III	NA	Cardia	NA	NO	MSS	WHITE	G3	0	25.0667	0	25.0667	TCGA	NA
TCGA-D7-8572	M	57	NA	II	NA	Body	NA	NO	MSS	WHITE	G2	0	17.0333	0	17.0333	TCGA	NA
TCGA-D7-8573	M	57	intestinal	II	NA	Body	NA	NO	MSI-L	WHITE	G3	0	19.7667	0	19.7667	TCGA	NA
TCGA-D7-8574	M	72	NA	III	NA	Antrum	NA	NO	MSS	WHITE	G3	0	17.4333	0	17.4333	TCGA	NA
TCGA-D7-8575	M	75	intestinal	III	NA	Body	NA	NO	MSS	WHITE	G3	1	18.4667	1	14.2333	TCGA	Distant Metastasis
TCGA-D7-8576	F	54	intestinal	III	NA	Antrum	NA	NO	MSS	WHITE	G3	1	14.8667	1	6.8	TCGA	Locoregional Recurrence|Distant Metastasis
TCGA-D7-8578	M	72	NA	I	NA	Antrum	NA	NO	MSS	WHITE	G2	0	21.4333	1	15.0333	TCGA	Locoregional Recurrence|Distant Metastasis
TCGA-D7-8579	F	66	intestinal	II	NA	Antrum	NA	NO	MSS	WHITE	G2	0	21.2	0	21.2	TCGA	NA
TCGA-D7-A4YT	M	56	intestinal	III	NA	Cardia	NA	NO	MSS	WHITE	G2	0	14.4667	0	14.4667	TCGA	NA
TCGA-D7-A4YU	M	73	intestinal	III	NA	Body	NA	NO	MSS	WHITE	G3	0	16.6667	0	16.6667	TCGA	NA
TCGA-D7-A4YV	F	69	intestinal	II	NA	Antrum	NA	NO	MSI-H	WHITE	G3	1	6	0	6	TCGA	NA
TCGA-D7-A4YX	M	63	NA	II	NA	Body	NA	NO	MSS	WHITE	G3	0	36.9333	0	36.9333	TCGA	NA
TCGA-D7-A4YY	M	61	NA	III	NA	Antrum	NA	NO	MSI-H	WHITE	G3	0	13.9667	0	13.9667	TCGA	NA
TCGA-D7-A4Z0	F	60	intestinal	II	NA	Antrum	NA	NO	MSS	WHITE	G3	0	14.9667	0	14.9667	TCGA	NA
TCGA-D7-A6ET	M	76	intestinal	III	NA	Body	NA	NO	MSS	WHITE	G2	0	26.8	1	25.9	TCGA	Locoregional Recurrence
TCGA-D7-A6EV	F	71	NA	II	NA	Antrum	NA	NO	MSI-L	WHITE	G3	0	11.4	0	11.4	TCGA	NA
TCGA-D7-A6EX	F	72	intestinal	III	NA	Antrum	NA	NO	MSS	WHITE	G3	0	11.4667	0	11.4667	TCGA	NA
TCGA-D7-A6EY	F	72	intestinal	III	NA	Antrum	NA	NO	MSI-H	WHITE	G3	1	11.6	1	11.6	TCGA	NA
TCGA-D7-A6EZ	M	66	intestinal	III	NA	Body	NA	NO	MSS	WHITE	G3	1	20.6	1	20.6	TCGA	NA
TCGA-D7-A6F0	F	79	intestinal	I	NA	Cardia	NA	NO	MSS	WHITE	G3	0	22.6	0	22.6	TCGA	NA
TCGA-D7-A6F2	M	62	intestinal	I	NA	Body	NA	NA	MSS	WHITE	G3	0	15.8667	0	15.8667	TCGA	NA
TCGA-D7-A747	M	57	diffuse	II	NA	Antrum	NA	NA	MSS	WHITE	G3	1	8.5	1	8.5	TCGA	NA
TCGA-D7-A748	F	41	diffuse	IV	NA	Body	NA	NA	MSS	WHITE	G3	1	4.4	1	3.3	TCGA	Locoregional Recurrence|Distant Metastasis
TCGA-D7-A74A	F	61	intestinal	III	NA	Cardia	NA	NO	MSS	WHITE	G2	0	20.2333	0	20.2333	TCGA	NA
TCGA-D7-A74B	F	52	diffuse	III	NA	Body	NA	NO	MSS	WHITE	G3	1	7.23333	1	5.8	TCGA	Locoregional Recurrence
TCGA-EQ-5647	F	86	NA	IV	NA	Antrum	NA	NO	MSS	WHITE	G2	1	0.633333	1	0.633333	TCGA	NA
TCGA-EQ-8122	F	71	intestinal	II	NA	Antrum	NA	NA	MSS	WHITE	G3	1	8.1	0	8.1	TCGA	NA
TCGA-EQ-A4SO	M	70	NA	III	NA	Antrum	NA	NO	MSI-L	WHITE	G2	0	16.4667	0	16.4667	TCGA	NA
TCGA-F1-6177	M	90	NA	I	NA	Antrum	NA	NO	MSI-H	BLACK OR AFRICAN AMERICAN	G2	0	6.66667	0	6.66667	TCGA	NA
TCGA-F1-6874	M	79	intestinal	I	NA	Cardia	NA	NO	MSI-H	WHITE	G3	0	14.6667	0	14.6667	TCGA	NA
TCGA-F1-6875	M	79	NA	I	NA	Antrum	NA	NA	MSS	BLACK OR AFRICAN AMERICAN	G2	1	73.2333	0	73.2333	TCGA	NA
TCGA-F1-A448	M	70	intestinal	III	NA	Antrum	NA	NO	MSI-H	WHITE	G3	0	21.5667	0	21.5667	TCGA	NA
TCGA-F1-A72C	M	68	intestinal	II	NA	Antrum	NA	NO	MSS	ASIAN	G2	0	11.5333	1	11.4333	TCGA	Distant Metastasis
TCGA-FP-7735	M	77	NA	I	NA	Body	NA	NA	MSS	BLACK OR AFRICAN AMERICAN	G2	1	3.53333	0	3.53333	TCGA	NA
TCGA-FP-7829	M	69	intestinal	II	NA	Gastroesophageal Junction	NA	NA	MSS	WHITE	G2	0	19.8	0	19.8	TCGA	NA
TCGA-FP-7916	M	77	diffuse	III	NA	Antrum	NA	NA	MSS	ASIAN	G3	1	14.2667	1	14.2667	TCGA	NA
TCGA-FP-7998	M	77	diffuse	III	NA	Body	NA	NA	MSS	WHITE	G3	0	22.6	0	22.6	TCGA	NA
TCGA-FP-8099	M	79	NA	II	NA	Gastroesophageal Junction	NA	NA	MSS	WHITE	G2	0	17.3	0	17.3	TCGA	NA
TCGA-FP-8209	M	49	diffuse	I	NA	Antrum	NA	NA	MSS	WHITE	G3	1	60.3667	1	55.8667	TCGA	Distant Metastasis
TCGA-FP-8210	M	48	diffuse	III	NA	Antrum	NA	NA	MSS	ASIAN	G3	1	5.1	1	5.1	TCGA	NA
TCGA-FP-8211	M	62	NA	II	NA	Cardia	NA	NA	MSS	WHITE	G2	0	13.7667	0	13.7667	TCGA	NA
TCGA-FP-8631	M	68	intestinal	III	NA	Gastroesophageal Junction	NA	NA	MSS	WHITE	G2	0	0.566667	0	0.566667	TCGA	NA
TCGA-FP-A4BE	M	55	NA	II	NA	Body	NA	NA	MSI-H	BLACK OR AFRICAN AMERICAN	G3	0	11.2333	0	11.2333	TCGA	NA
TCGA-FP-A4BF	M	68	NA	III	NA	Gastroesophageal Junction	NA	NA	MSS	WHITE	G3	1	5.6	1	5.3	TCGA	Distant Metastasis
TCGA-FP-A8CX	M	60	NA	III	NA	Body	NA	NO	MSS	WHITE	G3	0	0.233333	0	0.233333	TCGA	NA
TCGA-FP-A9TM	M	77	NA	NA	NA	Gastroesophageal Junction	NA	NO	MSS	WHITE	G2	0	6.3	0	6.3	TCGA	NA
TCGA-HF-7131	F	NA	NA	I	NA	Gastroesophageal Junction	NA	NA	MSS	NA	G2	0	NA	0	NA	TCGA	NA
TCGA-HF-7132	M	NA	intestinal	II	NA	Antrum	NA	NA	MSI-H	NA	G2	0	78.3667	0	78.3667	TCGA	NA
TCGA-HF-7133	F	NA	intestinal	IV	NA	Gastroesophageal Junction	NA	NO	MSS	NA	G2	0	63.9333	0	63.9333	TCGA	NA
TCGA-HF-7134	M	NA	intestinal	I	NA	Body	NA	NO	MSI-L	NA	G2	0	52.9333	0	52.9333	TCGA	NA
TCGA-HF-7136	M	NA	NA	III	NA	Gastroesophageal Junction	NA	NA	MSS	NA	G2	0	NA	0	NA	TCGA	Distant Metastasis
TCGA-HF-A5NB	F	75	intestinal	III	NA	Antrum	NA	NO	MSI-H	NA	G3	0	30.9333	0	30.9333	TCGA	NA
TCGA-HJ-7597	F	71	NA	I	NA	Body	NA	NO	MSI-H	WHITE	G3	1	26.8333	1	7.7	TCGA	Distant Metastasis
TCGA-HU-8238	M	56	intestinal	NA	NA	Antrum	NA	NA	MSS	ASIAN	G2	0	1.53333	0	1.53333	TCGA	NA
TCGA-HU-8243	M	66	intestinal	III	NA	Body	NA	NO	MSS	ASIAN	G2	1	6	1	4.4	TCGA	Distant Metastasis
TCGA-HU-8244	F	77	intestinal	I	NA	Body	NA	NO	MSI-L	ASIAN	G1	0	24.7333	0	24.7333	TCGA	NA
TCGA-HU-8245	M	72	intestinal	II	NA	Body	NA	NO	MSS	ASIAN	G3	0	18.4	0	18.4	TCGA	NA
TCGA-HU-8249	M	76	intestinal	III	NA	Body	NA	NO	MSS	ASIAN	G2	0	29.3667	0	29.3667	TCGA	NA
TCGA-HU-8602	F	58	diffuse	II	NA	Antrum	NA	NO	MSI-H	ASIAN	G3	0	22.6333	0	22.6333	TCGA	NA
TCGA-HU-8604	F	82	intestinal	II	NA	Antrum	NA	NO	MSS	ASIAN	G2	0	23.1333	0	23.1333	TCGA	NA
TCGA-HU-8608	M	70	diffuse	III	NA	Body	NA	NO	MSS	ASIAN	G3	0	21.3667	1	9.23333	TCGA	NA
TCGA-HU-8610	M	75	intestinal	I	NA	Body	NA	NO	MSS	ASIAN	G2	0	0.766667	0	0.766667	TCGA	NA
TCGA-HU-A4G2	M	45	diffuse	II	NA	Antrum	NA	YES	MSS	ASIAN	G3	0	24.6333	0	24.6333	TCGA	NA
TCGA-HU-A4G3	M	54	intestinal	II	NA	Antrum	NA	NO	MSS	ASIAN	G2	0	5.66667	0	5.66667	TCGA	NA
TCGA-HU-A4G6	M	74	intestinal	I	NA	Cardia	NA	NO	MSS	ASIAN	G3	0	24.6	0	24.6	TCGA	NA
TCGA-HU-A4G8	F	71	diffuse	II	NA	Antrum	NA	NO	MSI-H	ASIAN	G3	0	23	0	23	TCGA	NA
TCGA-HU-A4G9	F	67	intestinal	I	NA	Body	NA	NO	MSI-H	ASIAN	G2	0	24.5333	0	24.5333	TCGA	NA
TCGA-HU-A4GC	M	74	diffuse	III	NA	Antrum	NA	NO	MSI-L	ASIAN	G3	0	3.3	0	3.3	TCGA	NA
TCGA-HU-A4GD	M	56	intestinal	II	NA	Antrum	NA	NO	MSS	ASIAN	G3	0	23.0667	1	13.3	TCGA	Distant Metastasis
TCGA-HU-A4GF	M	69	intestinal	II	NA	Antrum	NA	NA	MSS	ASIAN	G2	0	26.1667	0	26.1667	TCGA	NA
TCGA-HU-A4GH	M	75	intestinal	I	NA	Body	NA	NO	MSS	ASIAN	G2	0	11.9333	0	11.9333	TCGA	NA
TCGA-HU-A4GJ	F	60	diffuse	III	NA	Antrum	NA	NO	MSS	ASIAN	G3	0	21.6667	1	18.2333	TCGA	Distant Metastasis
TCGA-HU-A4GN	M	61	intestinal	II	NA	Antrum	NA	NO	MSI-H	ASIAN	G2	0	30.4	1	5.6	TCGA	NA
TCGA-HU-A4GP	F	62	diffuse	II	NA	Antrum	NA	NA	MSI-L	ASIAN	G2	0	9.1	0	9.1	TCGA	NA
TCGA-HU-A4GQ	M	71	intestinal	III	NA	Antrum	NA	NA	MSI-H	ASIAN	G2	1	0.1	0	0.1	TCGA	NA
TCGA-HU-A4GT	F	71	intestinal	II	NA	Antrum	NA	NA	MSI-H	ASIAN	G3	0	6.6	0	6.6	TCGA	NA
TCGA-HU-A4GU	M	73	diffuse	II	NA	Antrum	NA	NO	MSI-H	ASIAN	G3	0	6.66667	0	6.66667	TCGA	NA
TCGA-HU-A4GX	F	70	diffuse	III	NA	Antrum	NA	NO	MSI-H	ASIAN	G3	0	20.5333	0	20.5333	TCGA	NA
TCGA-HU-A4GY	F	76	diffuse	III	NA	Antrum	NA	NA	MSS	ASIAN	G3	0	0.266667	0	0.266667	TCGA	NA
TCGA-HU-A4H0	M	72	diffuse	III	NA	Body	NA	NO	MSS	ASIAN	G3	0	2.13333	0	2.13333	TCGA	NA
TCGA-HU-A4H2	F	58	intestinal	III	NA	Antrum	NA	NO	MSS	ASIAN	G2	0	13.1333	0	13.1333	TCGA	NA
TCGA-HU-A4H3	F	56	diffuse	III	NA	Body	NA	NO	MSI-H	ASIAN	G3	0	29.4	1	13.6667	TCGA	Distant Metastasis
TCGA-HU-A4H4	F	53	intestinal	II	NA	Antrum	NA	NO	MSI-H	ASIAN	G3	0	24.1667	0	24.1667	TCGA	NA
TCGA-HU-A4H5	M	71	intestinal	I	NA	Body	NA	NO	MSS	ASIAN	GX	0	24.1333	0	24.1333	TCGA	NA
TCGA-HU-A4H6	F	72	intestinal	III	NA	Antrum	NA	NO	MSS	ASIAN	G2	0	21.4667	0	21.4667	TCGA	NA
TCGA-HU-A4H8	M	77	intestinal	I	NA	Antrum	NA	NO	MSI-H	ASIAN	G2	0	14.2667	1	11.8	TCGA	Distant Metastasis
TCGA-HU-A4HB	M	68	diffuse	II	NA	Antrum	NA	NO	MSS	ASIAN	G3	1	15.9	1	13	TCGA	Distant Metastasis
TCGA-HU-A4HD	M	73	intestinal	III	NA	Antrum	NA	NO	MSI-L	ASIAN	G2	0	33.8667	0	33.8667	TCGA	NA
TCGA-IN-7806	M	50	diffuse	II	NA	Gastroesophageal Junction	NA	NO	MSS	WHITE	G3	0	36.8667	0	36.8667	TCGA	NA
TCGA-IN-7808	M	59	diffuse	NA	NA	Gastroesophageal Junction	NA	NO	MSS	WHITE	G3	1	3.5	1	3.5	TCGA	Distant Metastasis
TCGA-IN-8462	M	80	NA	II	NA	Gastroesophageal Junction	NA	NO	MSI-L	WHITE	G2	0	19.0667	1	9	TCGA	Distant Metastasis
TCGA-IN-8663	M	68	NA	II	NA	Gastroesophageal Junction	NA	NA	MSI-L	WHITE	G3	1	3.43333	0	3.43333	TCGA	NA
TCGA-IN-A6RI	M	45	NA	I	NA	Gastroesophageal Junction	NA	NA	MSS	WHITE	G2	0	18.6333	0	18.6333	TCGA	NA
TCGA-IN-A6RJ	M	64	NA	I	NA	Gastroesophageal Junction	NA	NO	MSS	WHITE	G3	0	12.6333	0	12.6333	TCGA	NA
TCGA-IN-A6RL	M	84	NA	NA	NA	Gastroesophageal Junction	NA	NA	MSS	WHITE	G2	1	13.5333	1	10.2333	TCGA	Distant Metastasis
TCGA-IN-A6RN	F	72	NA	II	NA	Gastroesophageal Junction	NA	NA	MSS	WHITE	G2	0	19.8	0	19.8	TCGA	NA
TCGA-IN-A6RO	M	70	NA	I	NA	Gastroesophageal Junction	NA	NA	MSI-L	ASIAN	G2	1	NA	1	5.13333	TCGA	Distant Metastasis
TCGA-IN-A6RP	M	63	NA	NA	NA	Gastroesophageal Junction	NA	NA	MSS	WHITE	G3	0	6.53333	1	5	TCGA	NA
TCGA-IN-A6RR	M	84	NA	NA	NA	Gastroesophageal Junction	NA	NA	MSS	WHITE	G3	1	6.83333	0	6.83333	TCGA	NA
TCGA-IN-A6RS	M	76	NA	I	NA	Gastroesophageal Junction	NA	NA	MSS	WHITE	G2	0	12.7667	0	12.7667	TCGA	NA
TCGA-IN-A7NR	F	64	NA	IV	NA	Gastroesophageal Junction	NA	NA	MSS	WHITE	G3	0	6.6	0	6.6	TCGA	NA
TCGA-IN-A7NT	F	73	NA	II	NA	Gastroesophageal Junction	NA	NA	MSI-L	WHITE	G3	0	10.7667	0	10.7667	TCGA	NA
TCGA-IN-A7NU	M	69	NA	III	NA	Gastroesophageal Junction	NA	NA	MSS	WHITE	G3	0	11.8667	1	11.2333	TCGA	Distant Metastasis
TCGA-IN-AB1V	M	63	NA	I	NA	Gastroesophageal Junction	NA	NA	MSS	WHITE	G2	0	15.9667	0	15.9667	TCGA	NA
TCGA-IN-AB1X	F	78	NA	II	NA	Gastroesophageal Junction	NA	NA	MSI-L	WHITE	G3	0	13.7	0	13.7	TCGA	NA
TCGA-IP-7968	M	74	NA	III	NA	Gastroesophageal Junction	NA	NA	MSS	WHITE	G2	0	2.56667	0	2.56667	TCGA	NA
TCGA-KB-A6F5	M	73	intestinal	III	NA	Gastroesophageal Junction	NA	NO	MSS	NA	G3	0	5.63333	0	5.63333	TCGA	NA
TCGA-KB-A6F7	F	54	intestinal	I	NA	Body	NA	NA	MSS	NA	G3	0	64.5	0	64.5	TCGA	NA
TCGA-KB-A93G	M	68	NA	I	NA	Gastroesophageal Junction	NA	NO	MSS	WHITE	G1	0	20.4333	0	20.4333	TCGA	NA
TCGA-KB-A93H	F	79	intestinal	II	NA	Body	NA	NO	MSS	ASIAN	G1	0	38.1667	0	38.1667	TCGA	NA
TCGA-KB-A93J	M	78	diffuse	II	NA	NA	NA	NO	MSS	WHITE	G3	0	37.4667	0	37.4667	TCGA	NA
TCGA-MX-A5UG	M	78	diffuse	III	NA	Antrum	NA	YES	MSS	ASIAN	G3	1	3.76667	0	3.76667	TCGA	NA
TCGA-MX-A5UJ	F	86	intestinal	III	NA	Antrum	NA	NO	MSI-H	WHITE	G3	0	20	0	20	TCGA	NA
TCGA-MX-A663	M	66	NA	II	NA	NA	NA	NO	MSS	WHITE	G3	1	10	1	7.26667	TCGA	Distant Metastasis
TCGA-MX-A666	M	61	NA	II	NA	NA	NA	NO	MSS	WHITE	G2	0	14.2333	0	14.2333	TCGA	NA
TCGA-R5-A7O7	M	51	intestinal	IV	NA	Gastroesophageal Junction	NA	NO	MSS	WHITE	G2	0	46.3	0	46.3	TCGA	NA
TCGA-R5-A7ZE	F	66	intestinal	III	NA	Gastroesophageal Junction	NA	NO	MSS	WHITE	G2	1	18.4667	1	18.4667	TCGA	NA
TCGA-R5-A7ZF	F	65	intestinal	IV	NA	Antrum	NA	NO	MSS	BLACK OR AFRICAN AMERICAN	G2	1	8.63333	1	8.63333	TCGA	NA
TCGA-R5-A7ZI	F	44	diffuse	IV	NA	NA	NA	NO	MSI-H	WHITE	G3	0	75.5667	0	75.5667	TCGA	NA
TCGA-R5-A7ZR	F	70	intestinal	III	NA	Body	NA	NO	MSS	BLACK OR AFRICAN AMERICAN	G2	1	6.16667	1	6.16667	TCGA	NA
TCGA-R5-A804	M	54	diffuse	IV	NA	NA	NA	NO	MSI-L	BLACK OR AFRICAN AMERICAN	G3	1	4.66667	1	4.66667	TCGA	NA
TCGA-R5-A805	M	71	intestinal	III	NA	Gastroesophageal Junction	NA	NO	MSI-L	WHITE	G3	1	9.36667	1	9.36667	TCGA	NA
TCGA-RD-A7BS	M	46	diffuse	III	NA	Gastroesophageal Junction	NA	NO	MSS	WHITE	G3	1	11.2	1	8.13333	TCGA	NA
TCGA-RD-A7BT	M	66	intestinal	IV	NA	Body	NA	YES	MSI-L	NATIVE HAWAIIAN OR OTHER PACIFIC ISLANDER	G3	1	8.73333	1	4.1	TCGA	Distant Metastasis
TCGA-RD-A7BW	F	68	diffuse	I	NA	Body	NA	NO	MSS	WHITE	G3	1	5.2	0	5.2	TCGA	NA
TCGA-RD-A7C1	M	82	diffuse	I	NA	Body	NA	NO	MSS	WHITE	G3	1	16.9	1	14.6	TCGA	Distant Metastasis
TCGA-RD-A8MV	M	56	intestinal	III	NA	Body	NA	YES	MSS	WHITE	G3	0	124	0	124	TCGA	NA
TCGA-RD-A8MW	M	72	intestinal	III	NA	Antrum	NA	YES	MSS	WHITE	G3	1	38.4333	1	3.26667	TCGA	Distant Metastasis
TCGA-RD-A8N0	F	53	diffuse	III	NA	Body	NA	YES	MSS	WHITE	G3	0	41.2	0	41.2	TCGA	NA
TCGA-RD-A8N1	M	70	diffuse	III	NA	Antrum	NA	YES	MSS	WHITE	G3	0	117.3	0	117.3	TCGA	NA
TCGA-RD-A8N2	F	59	diffuse	I	NA	Antrum	NA	YES	MSS	WHITE	G3	0	118	0	118	TCGA	NA
TCGA-RD-A8N4	F	58	diffuse	III	NA	Antrum	NA	NO	MSS	WHITE	G3	0	72.3667	0	72.3667	TCGA	NA
TCGA-RD-A8N5	M	78	intestinal	III	NA	Body	NA	YES	MSS	WHITE	G2	1	58.2333	0	58.2333	TCGA	NA
TCGA-RD-A8N6	F	78	intestinal	III	NA	Antrum	NA	NO	MSS	WHITE	G3	1	9.06667	1	5.43333	TCGA	NA
TCGA-RD-A8N9	F	63	diffuse	II	NA	Gastroesophageal Junction	NA	NO	MSS	ASIAN	G3	0	36.1	0	36.1	TCGA	NA
TCGA-RD-A8NB	F	80	diffuse	III	NA	Antrum	NA	YES	MSI-H	WHITE	G3	1	17.1	1	7.66667	TCGA	NA
TCGA-SW-A7EA	F	61	diffuse	I	NA	Antrum	NA	NO	MSI-H	WHITE	GX	0	19.3	0	19.3	TCGA	NA
TCGA-SW-A7EB	M	45	intestinal	III	NA	Antrum	NA	NA	MSS	WHITE	G2	0	5.86667	0	5.86667	TCGA	NA
TCGA-VQ-A8DL	F	69	intestinal	II	NA	Cardia	NA	NO	MSS	WHITE	G2	1	0.933333	0	0.933333	TCGA	NA
TCGA-VQ-A8DT	M	43	intestinal	III	NA	Body	NA	NO	MSS	NA	G3	0	49.4667	1	45.8667	TCGA	Distant Metastasis
TCGA-VQ-A8DU	M	63	intestinal	III	NA	Antrum	NA	NO	MSS	WHITE	G2	1	5.53333	1	5.26667	TCGA	NA
TCGA-VQ-A8DV	M	48	intestinal	I	NA	Antrum	NA	NO	MSS	WHITE	G2	1	13.4333	1	9.6	TCGA	NA
TCGA-VQ-A8DZ	M	70	NA	IV	NA	Antrum	NA	NO	MSS	BLACK OR AFRICAN AMERICAN	G3	1	13.2	1	13.2	TCGA	NA
TCGA-VQ-A8E0	M	68	intestinal	III	NA	Body	NA	NO	MSS	BLACK OR AFRICAN AMERICAN	G3	1	18.7333	1	17.7	TCGA	NA
TCGA-VQ-A8E2	M	57	intestinal	III	NA	Body	NA	NO	MSS	ASIAN	G2	0	43.9667	0	43.9667	TCGA	NA
TCGA-VQ-A8E3	M	79	intestinal	II	NA	Antrum	NA	NO	MSI-H	WHITE	G3	1	22.0333	1	17.9333	TCGA	NA
TCGA-VQ-A8E7	M	59	intestinal	IV	NA	Gastroesophageal Junction	NA	NO	MSS	WHITE	G2	0	37.9333	1	34.9333	TCGA	Distant Metastasis
TCGA-VQ-A8P2	M	68	intestinal	III	NA	Body	NA	NO	MSI-H	WHITE	G2	0	38.6667	0	38.6667	TCGA	NA
TCGA-VQ-A8P3	M	72	intestinal	III	NA	Body	NA	NO	MSS	WHITE	G2	0	37.7333	0	37.7333	TCGA	NA
TCGA-VQ-A8P5	M	67	intestinal	II	NA	Body	NA	NO	MSI-L	WHITE	G3	1	7.83333	0	7.83333	TCGA	NA
TCGA-VQ-A8P8	F	72	intestinal	II	NA	Body	NA	NO	MSS	BLACK OR AFRICAN AMERICAN	G2	0	31.4	0	31.4	TCGA	NA
TCGA-VQ-A8PB	F	65	intestinal	II	NA	Antrum	NA	NO	MSI-H	WHITE	G2	1	34.7667	0	34.7667	TCGA	NA
TCGA-VQ-A8PC	M	65	NA	III	NA	Antrum	NA	NO	MSS	WHITE	G3	1	46.9	1	42.9	TCGA	NA
TCGA-VQ-A8PD	M	69	NA	III	NA	Body	NA	NO	MSS	WHITE	G2	1	16.5333	1	4.46667	TCGA	NA
TCGA-VQ-A8PE	M	78	intestinal	III	NA	Cardia	NA	NO	MSS	WHITE	G3	1	22.5	1	8.83333	TCGA	NA
TCGA-VQ-A8PF	M	76	intestinal	III	NA	Body	NA	NO	MSS	NA	G3	1	2.53333	0	2.53333	TCGA	NA
TCGA-VQ-A8PH	M	62	intestinal	III	NA	Antrum	NA	NO	MSS	WHITE	G2	1	12.9667	1	12.5667	TCGA	NA
TCGA-VQ-A8PJ	M	53	intestinal	IV	NA	Body	NA	NO	MSS	NA	GX	1	2.73333	1	2.73333	TCGA	NA
TCGA-VQ-A8PK	M	58	intestinal	III	NA	Gastroesophageal Junction	NA	NO	MSS	WHITE	G2	1	18.1	1	8.76667	TCGA	NA
TCGA-VQ-A8PM	M	56	NA	IV	NA	Cardia	NA	NO	MSS	WHITE	G3	1	1.9	1	1.9	TCGA	NA
TCGA-VQ-A8PO	M	74	NA	II	NA	Antrum	NA	NO	MSI-H	WHITE	G3	1	9.4	1	8.53333	TCGA	NA
TCGA-VQ-A8PP	M	76	intestinal	IV	NA	Body	NA	NO	MSI-H	NA	G2	1	23.7333	1	16.7333	TCGA	NA
TCGA-VQ-A8PQ	F	50	intestinal	IV	NA	Cardia	NA	NO	MSS	WHITE	G2	1	15.8667	1	3.03333	TCGA	NA
TCGA-VQ-A8PS	M	76	intestinal	III	NA	NA	NA	NO	MSS	WHITE	G2	1	13.5333	1	4.36667	TCGA	NA
TCGA-VQ-A8PT	M	65	intestinal	III	NA	Body	NA	NO	MSI-H	WHITE	G3	0	30	0	30	TCGA	NA
TCGA-VQ-A8PU	F	72	intestinal	III	NA	Body	NA	NO	MSS	WHITE	G3	1	27.7333	0	27.7333	TCGA	NA
TCGA-VQ-A8PX	M	51	intestinal	I	NA	NA	NA	NO	MSI-H	NA	G2	0	65.4667	0	65.4667	TCGA	NA
TCGA-VQ-A8PY	F	47	intestinal	III	NA	Antrum	NA	NO	MSS	WHITE	G2	1	14.5333	0	14.5333	TCGA	NA
TCGA-VQ-A8PZ	F	56	NA	II	NA	Body	NA	NO	MSS	WHITE	G3	0	74.4333	0	74.4333	TCGA	NA
TCGA-VQ-A91A	M	67	intestinal	III	NA	Body	NA	NO	MSS	WHITE	G1	0	40	1	4.3	TCGA	NA
TCGA-VQ-A91D	M	70	intestinal	III	NA	Body	NA	NO	MSI-H	WHITE	G2	1	11.8667	1	11.7	TCGA	NA
TCGA-VQ-A91E	F	67	intestinal	III	NA	Antrum	NA	NO	MSI-H	WHITE	G3	0	22.1333	0	22.1333	TCGA	NA
TCGA-VQ-A91K	M	69	intestinal	III	NA	Antrum	NA	NO	MSI-H	WHITE	G2	0	62.0667	0	62.0667	TCGA	NA
TCGA-VQ-A91N	F	59	intestinal	IV	NA	Antrum	NA	NO	MSS	NA	G2	1	19	1	14.6	TCGA	NA
TCGA-VQ-A91Q	M	61	intestinal	IV	NA	Cardia	NA	NO	MSS	NA	G3	1	21.1	1	18.3667	TCGA	NA
TCGA-VQ-A91S	M	63	intestinal	III	NA	Body	NA	YES	MSS	BLACK OR AFRICAN AMERICAN	GX	0	33.3333	0	33.3333	TCGA	NA
TCGA-VQ-A91U	M	78	intestinal	III	NA	Gastroesophageal Junction	NA	NO	MSS	ASIAN	G2	1	1.73333	0	1.73333	TCGA	NA
TCGA-VQ-A91V	M	58	intestinal	III	NA	Gastroesophageal Junction	NA	NO	MSS	NA	G2	0	43.2333	1	16.8	TCGA	Distant Metastasis
TCGA-VQ-A91W	M	30	intestinal	III	NA	Body	NA	NO	MSI-L	WHITE	G2	0	61.7	0	61.7	TCGA	NA
TCGA-VQ-A91X	M	74	intestinal	III	NA	Antrum	NA	NO	MSI-L	WHITE	G3	1	9.63333	0	9.63333	TCGA	NA
TCGA-VQ-A91Y	M	67	intestinal	III	NA	Antrum	NA	NO	MSS	WHITE	G3	1	9.86667	1	8.6	TCGA	NA
TCGA-VQ-A91Z	F	67	intestinal	III	NA	Antrum	NA	NO	MSS	WHITE	G2	0	56.3333	1	43.6667	TCGA	NA
TCGA-VQ-A922	M	70	intestinal	IV	NA	Antrum	NA	NO	MSI-L	NA	G2	1	9.16667	1	8.4	TCGA	NA
TCGA-VQ-A923	M	90	intestinal	III	NA	Body	NA	NO	MSS	WHITE	G3	1	2.03333	0	2.03333	TCGA	NA
TCGA-VQ-A924	M	69	intestinal	II	NA	Antrum	NA	NO	MSI-H	NA	G2	1	56.2	1	56.2	TCGA	NA
TCGA-VQ-A925	M	66	intestinal	III	NA	Antrum	NA	NO	MSS	WHITE	G2	1	4.6	1	4.6	TCGA	NA
TCGA-VQ-A927	M	81	diffuse	III	NA	Body	NA	NO	MSS	WHITE	G1	1	6.66667	1	6.66667	TCGA	NA
TCGA-VQ-A928	M	49	intestinal	IV	NA	Body	NA	NO	MSS	WHITE	G2	1	5.8	1	4.93333	TCGA	NA
TCGA-VQ-A92D	M	67	intestinal	I	NA	Cardia	NA	NO	MSI-L	WHITE	G2	0	67.7333	0	67.7333	TCGA	NA
TCGA-VQ-A94O	M	74	intestinal	III	NA	Antrum	NA	NO	MSS	BLACK OR AFRICAN AMERICAN	G2	1	21.3333	1	6.16667	TCGA	NA
TCGA-VQ-A94P	M	57	NA	NA	NA	Body	NA	NO	MSS	WHITE	GX	1	2.7	1	2.7	TCGA	NA
TCGA-VQ-A94R	M	63	intestinal	NA	NA	Antrum	NA	NO	MSI-L	WHITE	G2	1	43.1333	1	33.9333	TCGA	NA
TCGA-VQ-A94T	M	73	diffuse	III	NA	Cardia	NA	NO	MSI-L	NA	G3	1	11.4	1	9.86667	TCGA	NA
TCGA-VQ-A94U	M	70	NA	II	NA	Antrum	NA	NO	MSS	WHITE	G3	0	27.3	0	27.3	TCGA	NA
TCGA-VQ-AA64	M	68	intestinal	III	NA	Cardia	NA	NO	MSS	WHITE	G2	1	18.6667	1	18.6667	TCGA	NA
TCGA-VQ-AA68	F	52	intestinal	III	NA	Gastroesophageal Junction	NA	NO	MSS	WHITE	G2	0	44.2667	0	44.2667	TCGA	NA
TCGA-VQ-AA69	M	35	intestinal	III	NA	Gastroesophageal Junction	NA	NO	MSS	WHITE	G2	0	28.8	0	28.8	TCGA	NA
TCGA-VQ-AA6A	M	56	intestinal	III	NA	Gastroesophageal Junction	NA	NO	MSS	WHITE	G2	0	39.4667	0	39.4667	TCGA	NA
TCGA-VQ-AA6B	M	48	intestinal	III	NA	Gastroesophageal Junction	NA	YES	MSS	WHITE	G2	0	33.4	0	33.4	TCGA	NA
TCGA-VQ-AA6D	F	52	intestinal	III	NA	Antrum	NA	YES	MSI-H	NA	G2	0	17.3667	0	17.3667	TCGA	NA
TCGA-VQ-AA6F	M	57	intestinal	II	NA	Cardia	NA	NO	MSS	WHITE	G2	0	54.8667	1	18.2	TCGA	NA
TCGA-VQ-AA6G	M	68	intestinal	II	NA	Cardia	NA	NO	MSS	WHITE	G2	1	26.4	1	15.6333	TCGA	NA
TCGA-VQ-AA6I	M	68	intestinal	III	NA	Gastroesophageal Junction	NA	NO	MSS	WHITE	G3	1	16.3667	1	15.8333	TCGA	NA
TCGA-VQ-AA6J	M	75	intestinal	III	NA	Cardia	NA	NO	MSS	BLACK OR AFRICAN AMERICAN	G3	0	27.9333	0	27.9333	TCGA	NA
TCGA-VQ-AA6K	M	59	NA	III	NA	Cardia	NA	NO	MSS	WHITE	G3	1	12.6	1	11.0667	TCGA	NA
TCGA-ZA-A8F6	M	71	intestinal	I	NA	Antrum	NA	NO	MSS	WHITE	G2	0	17.5	0	17.5	TCGA	NA
TCGA-ZQ-A9CR	F	79	intestinal	III	NA	Antrum	NA	NO	MSI-L	WHITE	G3	1	0.8	0	0.8	TCGA	NA
PGM1	M	67	intestinal	II	NA	Body	negative	NA	NA	ASIAN	NA	0	78.95	NA	NA	TianJin	NA
PGM10	F	33	diffuse	IV	NA	Body	negative	NA	NA	ASIAN	NA	0	3.74	NA	NA	TianJin	NA
PGM11	M	59	diffuse	II	NA	Body	positive	NA	NA	ASIAN	NA	1	67.64	NA	NA	TianJin	NA
PGM12	F	58	intestinal	IV	NA	Antrum	negative	NA	NA	ASIAN	2	1	28.49	NA	NA	TianJin	NA
PGM13	M	60	diffuse	IV	NA	Body	positive	NA	NA	ASIAN	3	1	45.15	NA	NA	TianJin	NA
PGM14	M	55	diffuse	II	NA	Cardia	positive	NA	NA	ASIAN	NA	1	10.69	NA	NA	TianJin	NA
PGM15	M	61	intestinal	IV	NA	Body	positive	NA	NA	ASIAN	2	0	NA	NA	NA	TianJin	NA
PGM16	M	52	intestinal	II	NA	Body	positive	NA	NA	ASIAN	3	0	68.82	NA	NA	TianJin	NA
PGM17	M	50	diffuse	III	NA	Antrum	negative	NA	NA	ASIAN	3	1	6.43	NA	NA	TianJin	NA
PGM18	F	76	diffuse	II	NA	Antrum	positive	NA	NA	ASIAN	9	0	63.57	NA	NA	TianJin	NA
PGM19	M	40	intestinal	III	NA	Antrum	positive	NA	NA	ASIAN	2	1	20.46	NA	NA	TianJin	NA
PGM2	M	39	diffuse	III	NA	Body	positive	NA	NA	ASIAN	3	1	9.74	NA	NA	TianJin	NA
PGM20	M	58	diffuse	III	NA	Body	negative	NA	NA	ASIAN	NA	1	43.28	NA	NA	TianJin	NA
PGM21	F	48	diffuse	IV	NA	Antrum	positive	NA	NA	ASIAN	NA	0	4.72	NA	NA	TianJin	NA
PGM22	F	55	diffuse	II	NA	Cardia	positive	NA	NA	ASIAN	NA	0	63.84	NA	NA	TianJin	NA
PGM23	M	54	intestinal	II	NA	Cardia	negative	NA	NA	ASIAN	2	0	63.44	NA	NA	TianJin	NA
PGM24	M	63	intestinal	II	NA	Cardia	positive	NA	NA	ASIAN	1	0	58.52	NA	NA	TianJin	NA
PGM25	M	58	intestinal	II	NA	Cardia	positive	NA	NA	ASIAN	2	0	63.08	NA	NA	TianJin	NA
PGM26	M	50	diffuse	III	NA	Cardia	positive	NA	NA	ASIAN	NA	0	18.98	NA	NA	TianJin	NA
PGM27	M	55	diffuse	II	NA	Body	positive	NA	NA	ASIAN	NA	0	60.92	NA	NA	TianJin	NA
PGM28	M	62	intestinal	II	NA	Cardia	negative	NA	NA	ASIAN	2	1	11.84	NA	NA	TianJin	NA
PGM29	M	72	diffuse	I	NA	Cardia	positive	NA	NA	ASIAN	NA	0	5.41	NA	NA	TianJin	NA
PGM3	M	59	diffuse	IV	NA	Body	negative	NA	NA	ASIAN	NA	1	14.43	NA	NA	TianJin	NA
PGM30	F	59	diffuse	III	NA	Antrum	positive	NA	NA	ASIAN	NA	0	20.69	NA	NA	TianJin	NA
PGM31	M	61	diffuse	IV	NA	Cardia	positive	NA	NA	ASIAN	3	0	31.61	NA	NA	TianJin	NA
PGM32	M	67	intestinal	III	NA	Cardia	positive	NA	NA	ASIAN	2	1	14.03	NA	NA	TianJin	NA
PGM33	M	82	diffuse	II	NA	Cardia	positive	NA	NA	ASIAN	3	0	13.7	NA	NA	TianJin	NA
PGM34	F	53	intestinal	III	NA	Antrum	positive	NA	NA	ASIAN	2	0	58.82	NA	NA	TianJin	NA
PGM35	M	64	intestinal	II	NA	Body	negative	NA	NA	ASIAN	2	0	53.38	NA	NA	TianJin	NA
PGM36	M	68	intestinal	II	NA	Antrum	negative	NA	NA	ASIAN	2	0	58.36	NA	NA	TianJin	NA
PGM37	M	65	intestinal	IV	NA	Cardia	positive	NA	NA	ASIAN	2	0	0.2	NA	NA	TianJin	NA
PGM38	M	33	diffuse	III	NA	Antrum	negative	NA	NA	ASIAN	3	1	19.02	NA	NA	TianJin	NA
PGM39	M	74	intestinal	IV	NA	Cardia	positive	NA	NA	ASIAN	2	1	11.74	NA	NA	TianJin	NA
PGM4	M	67	diffuse	III	NA	Body	positive	NA	NA	ASIAN	NA	0	9.8	NA	NA	TianJin	NA
PGM40	M	54	intestinal	III	NA	Cardia	positive	NA	NA	ASIAN	2	0	26.82	NA	NA	TianJin	NA
PGM41	F	64	diffuse	III	NA	Antrum	positive	NA	NA	ASIAN	3	1	13.77	NA	NA	TianJin	NA
PGM42	M	58	intestinal	IV	NA	Cardia	negative	NA	NA	ASIAN	2	0	55.57	NA	NA	TianJin	NA
PGM43	F	63	intestinal	II	NA	Body	negative	NA	NA	ASIAN	2	0	55.41	NA	NA	TianJin	NA
PGM44	F	55	intestinal	III	NA	Antrum	positive	NA	NA	ASIAN	2	0	55.34	NA	NA	TianJin	NA
PGM45	M	41	diffuse	III	NA	Cardia	negative	NA	NA	ASIAN	3	0	54.95	NA	NA	TianJin	NA
PGM46	F	73	intestinal	II	NA	Antrum	negative	NA	NA	ASIAN	2	1	41.8	NA	NA	TianJin	NA
PGM47	F	46	diffuse	II	NA	Cardia	positive	NA	NA	ASIAN	3	1	24.43	NA	NA	TianJin	NA
PGM48	F	50	diffuse	II	NA	Body	negative	NA	NA	ASIAN	3	0	53.02	NA	NA	TianJin	NA
PGM49	M	47	diffuse	II	NA	Body	negative	NA	NA	ASIAN	3	1	36.75	NA	NA	TianJin	NA
PGM5	M	49	diffuse	III	NA	Antrum	positive	NA	NA	ASIAN	NA	0	40.82	NA	NA	TianJin	NA
PGM50	M	64	intestinal	II	NA	Body	negative	NA	NA	ASIAN	3	1	13.41	NA	NA	TianJin	NA
PGM51	F	41	diffuse	III	NA	Body	positive	NA	NA	ASIAN	NA	1	20.69	NA	NA	TianJin	NA
PGM52	M	50	intestinal	IV	NA	Antrum	negative	NA	NA	ASIAN	2	0	45.25	NA	NA	TianJin	NA
PGM53	F	68	intestinal	III	NA	Antrum	positive	NA	NA	ASIAN	3	1	24.03	NA	NA	TianJin	NA
PGM54	M	66	intestinal	III	NA	Cardia	negative	NA	NA	ASIAN	2	1	9.57	NA	NA	TianJin	NA
PGM55	F	69	diffuse	III	NA	Antrum	negative	NA	NA	ASIAN	NA	0	47.54	NA	NA	TianJin	NA
PGM56	M	25	diffuse	III	NA	Antrum	negative	NA	NA	ASIAN	3	1	NA	NA	NA	TianJin	NA
PGM57	M	27	diffuse	IV	NA	Body	negative	NA	NA	ASIAN	3	1	7.11	NA	NA	TianJin	NA
PGM58	M	76	intestinal	IV	NA	Cardia	negative	NA	NA	ASIAN	3	1	25.84	NA	NA	TianJin	NA
PGM59	F	55	intestinal	III	NA	Cardia	positive	NA	NA	ASIAN	2	1	6.49	NA	NA	TianJin	NA
PGM6	F	35	intestinal	III	NA	Body	negative	NA	NA	ASIAN	NA	0	10.49	NA	NA	TianJin	NA
PGM60	F	45	intestinal	III	NA	Antrum	negative	NA	NA	ASIAN	3	0	45.18	NA	NA	TianJin	NA
PGM61	M	55	diffuse	III	NA	Antrum	positive	NA	NA	ASIAN	3	1	31.34	NA	NA	TianJin	NA
PGM62	M	67	diffuse	IV	NA	Antrum	positive	NA	NA	ASIAN	3	0	42.33	NA	NA	TianJin	NA
PGM63	M	55	intestinal	IV	NA	Antrum	negative	NA	NA	ASIAN	3	1	5.87	NA	NA	TianJin	NA
PGM64	M	72	intestinal	II	NA	Antrum	positive	NA	NA	ASIAN	3	0	1.7	NA	NA	TianJin	NA
PGM65	F	59	intestinal	I	NA	Antrum	negative	NA	NA	ASIAN	2	0	31.08	NA	NA	TianJin	NA
PGM66	M	77	diffuse	III	NA	Cardia	negative	NA	NA	ASIAN	3	0	8.79	NA	NA	TianJin	NA
PGM67	F	70	intestinal	IV	NA	Cardia	positive	NA	NA	ASIAN	2	0	25.67	NA	NA	TianJin	NA
PGM68	F	66	intestinal	III	NA	Cardia	negative	NA	NA	ASIAN	2	0	20.85	NA	NA	TianJin	NA
PGM69	F	67	intestinal	III	NA	Body	negative	NA	NA	ASIAN	NA	0	27.8	NA	NA	TianJin	NA
PGM7	F	66	intestinal	III	NA	Body	positive	NA	NA	ASIAN	2	0	11.48	NA	NA	TianJin	NA
PGM70	F	56	intestinal	IV	NA	Cardia	negative	NA	NA	ASIAN	2	0	26.36	NA	NA	TianJin	NA
PGM71	F	69	intestinal	III	NA	Body	negative	NA	NA	ASIAN	2	1	10.69	NA	NA	TianJin	NA
PGM72	F	34	diffuse	IV	NA	Antrum	negative	NA	NA	ASIAN	NA	0	27.15	NA	NA	TianJin	NA
PGM73	F	58	diffuse	II	NA	Body	negative	NA	NA	ASIAN	3	0	26.85	NA	NA	TianJin	NA
PGM74	F	48	diffuse	IV	NA	Body	positive	NA	NA	ASIAN	3	0	25.08	NA	NA	TianJin	NA
PGM75	F	60	intestinal	III	NA	Body	negative	NA	NA	ASIAN	NA	1	14.36	NA	NA	TianJin	NA
PGM76	F	60	diffuse	III	NA	Cardia	negative	NA	NA	ASIAN	NA	0	21.8	NA	NA	TianJin	NA
PGM77	F	65	diffuse	III	NA	Cardia	negative	NA	NA	ASIAN	3	1	14.03	NA	NA	TianJin	NA
PGM78	F	61	intestinal	II	NA	Body	negative	NA	NA	ASIAN	NA	0	20.43	NA	NA	TianJin	NA
PGM8	M	70	diffuse	II	NA	Antrum	negative	NA	NA	ASIAN	9	1	11.54	NA	NA	TianJin	NA
PGM9	M	61	intestinal	IV	NA	Antrum	negative	NA	NA	ASIAN	2	0	50.92	NA	NA	TianJin	NA
pfg005T	F	71	diffuse	IV	poor	Antrum	negative	positive	MSS	ASIAN	NA	NA	NA	NA	NA	HongKong	NA
pfg008T	F	68	intestinal	II	moderate	Antrum	negative	positive	MSI	ASIAN	NA	NA	NA	NA	NA	HongKong	NA
pfg022T	M	61	intestinal	III	poor	Body	positive	negative	MSS	ASIAN	NA	NA	NA	NA	NA	HongKong	NA
pfg023T	F	65	mixed	III	poor	Body	negative	negative	MSS	ASIAN	NA	NA	NA	NA	NA	HongKong	NA
pfg030T	F	74	intestinal	III	moderate	Antrum	negative	negative	MSS	ASIAN	NA	NA	NA	NA	NA	HongKong	NA
pfg031T	F	53	mixed	IV	poor	Body	negative	negative	MSS	ASIAN	NA	NA	NA	NA	NA	HongKong	NA
pfg032T	M	84	intestinal	IV	poor	Antrum	negative	positive	MSS	ASIAN	NA	NA	NA	NA	NA	HongKong	NA
pfg034T	M	63	mixed	IV	poor	Antrum	negative	negative	MSS	ASIAN	NA	NA	NA	NA	NA	HongKong	NA
pfg035T	M	74	intestinal	IV	moderate	Cardia	negative	positive	MSS	ASIAN	NA	NA	NA	NA	NA	HongKong	NA
pfg036T	M	81	intestinal	III	poor	Body	positive	positive	MSS	ASIAN	NA	NA	NA	NA	NA	HongKong	NA
pfg038T	M	67	intestinal	IV	moderate	Antrum	negative	negative	MSS	ASIAN	NA	NA	NA	NA	NA	HongKong	NA
pfg039T	M	49	intestinal	IV	poor	Cardia	negative	positive	MSS	ASIAN	NA	NA	NA	NA	NA	HongKong	NA
pfg043T	M	76	intestinal	III	poor	Cardia	positive	negative	MSS	ASIAN	NA	NA	NA	NA	NA	HongKong	NA
pfg050T	M	61	diffuse	III	poor	Antrum	negative	negative	MSS	ASIAN	NA	NA	NA	NA	NA	HongKong	NA
pfg052T	M	70	intestinal	III	moderate	Body	negative	positive	MSS	ASIAN	NA	NA	NA	NA	NA	HongKong	NA
pfg053T	M	80	intestinal	I	poor	Cardia	negative	negative	MSS	ASIAN	NA	NA	NA	NA	NA	HongKong	NA
pfg054T	M	72	intestinal	IV	moderate	Antrum	negative	positive	MSS	ASIAN	NA	NA	NA	NA	NA	HongKong	NA
pfg057T	F	41	intestinal	IV	poor	Cardia	negative	negative	MSI	ASIAN	NA	NA	NA	NA	NA	HongKong	NA
pfg058T	M	59	intestinal	III	moderate	Antrum	negative	positive	MSS	ASIAN	NA	NA	NA	NA	NA	HongKong	NA
pfg059T	M	67	diffuse	IV	poor	Antrum	negative	negative	MSS	ASIAN	NA	NA	NA	NA	NA	HongKong	NA
pfg060T	F	83	intestinal	III	moderate	Cardia	negative	positive	MSS	ASIAN	NA	NA	NA	NA	NA	HongKong	NA
pfg062T	F	75	intestinal	IV	poor	Body	positive	positive	MSS	ASIAN	NA	NA	NA	NA	NA	HongKong	NA
pfg064T	F	84	diffuse	IV	poor	Body	negative	negative	MSS	ASIAN	NA	NA	NA	NA	NA	HongKong	NA
pfg065T	M	84	intestinal	III	moderate	Cardia	negative	positive	MSS	ASIAN	NA	NA	NA	NA	NA	HongKong	NA
pfg068T	F	74	intestinal	III	poor	Antrum	negative	negative	MSI	ASIAN	NA	NA	NA	NA	NA	HongKong	NA
pfg069T	F	72	intestinal	III	poor	Cardia	negative	negative	MSS	ASIAN	NA	NA	NA	NA	NA	HongKong	NA
pfg072T	M	78	intestinal	IV	moderate	Antrum	negative	positive	MSS	ASIAN	NA	NA	NA	NA	NA	HongKong	NA
pfg073T	F	63	diffuse	III	poor	Antrum	negative	negative	MSS	ASIAN	NA	NA	NA	NA	NA	HongKong	NA
pfg076T	F	88	intestinal	II	moderate	Antrum	negative	positive	MSS	ASIAN	NA	NA	NA	NA	NA	HongKong	NA
pfg081T	M	72	intestinal	IV	poor	Antrum	negative	positive	MSS	ASIAN	NA	NA	NA	NA	NA	HongKong	NA
pfg082T	M	72	intestinal	IV	poor	Cardia	negative	negative	MSS	ASIAN	NA	NA	NA	NA	NA	HongKong	NA
pfg088T	M	56	intestinal	IV	poor	Cardia	positive	positive	MSS	ASIAN	NA	NA	NA	NA	NA	HongKong	NA
pfg089T	M	66	mixed	IV	poor	Body	negative	positive	MSS	ASIAN	NA	NA	NA	NA	NA	HongKong	NA
pfg092T	M	72	intestinal	I	moderate	Cardia	negative	negative	MSS	ASIAN	NA	NA	NA	NA	NA	HongKong	NA
pfg094T	F	52	diffuse	III	poor	Diffuse	negative	negative	MSS	ASIAN	NA	NA	NA	NA	NA	HongKong	NA
pfg097T	F	74	diffuse	IV	poor	Body	negative	negative	MSS	ASIAN	NA	NA	NA	NA	NA	HongKong	NA
pfg099T	M	62	intestinal	IV	poor	Antrum	negative	positive	MSS	ASIAN	NA	NA	NA	NA	NA	HongKong	NA
pfg100T	M	82	intestinal	IV	poor	Cardia	negative	negative	MSS	ASIAN	NA	NA	NA	NA	NA	HongKong	NA
pfg102T	M	76	intestinal	IV	moderate	Antrum	negative	negative	MSS	ASIAN	NA	NA	NA	NA	NA	HongKong	NA
pfg103T	F	45	intestinal	IV	poor	Body	negative	positive	MSI	ASIAN	NA	NA	NA	NA	NA	HongKong	NA
pfg104T	M	47	intestinal	IV	poor	Cardia	positive	negative	MSS	ASIAN	NA	NA	NA	NA	NA	HongKong	NA
pfg105T	M	73	intestinal	I	moderate	Cardia	negative	positive	MSS	ASIAN	NA	NA	NA	NA	NA	HongKong	NA
pfg106T	F	59	intestinal	IV	poor	Body	negative	negative	MSS	ASIAN	NA	NA	NA	NA	NA	HongKong	NA
pfg107T	F	67	intestinal	IV	moderate	Cardia	negative	positive	MSS	ASIAN	NA	NA	NA	NA	NA	HongKong	NA
pfg108T	M	64	intestinal	III	moderate	Cardia	negative	negative	MSS	ASIAN	NA	NA	NA	NA	NA	HongKong	NA
pfg115T	F	75	mixed	IV	poor	Cardia	negative	negative	MSS	ASIAN	NA	NA	NA	NA	NA	HongKong	NA
pfg116T	M	78	mixed	IV	poor	Antrum	negative	negative	MSS	ASIAN	NA	NA	NA	NA	NA	HongKong	NA
pfg118T	F	84	mixed	II	moderate	Antrum	negative	positive	MSS	ASIAN	NA	NA	NA	NA	NA	HongKong	NA
pfg119T	M	84	mixed	IV	moderate	Antrum	negative	positive	MSS	ASIAN	NA	NA	NA	NA	NA	HongKong	NA
pfg120T	F	76	intestinal	III	moderate	Antrum	negative	negative	MSS	ASIAN	NA	NA	NA	NA	NA	HongKong	NA
pfg121T	M	80	intestinal	III	poor	Antrum	negative	negative	MSS	ASIAN	NA	NA	NA	NA	NA	HongKong	NA
pfg122T	F	83	intestinal	IV	poor	Antrum	negative	negative	MSI	ASIAN	NA	NA	NA	NA	NA	HongKong	NA
pfg123T	F	70	mixed	IV	poor	Body	negative	negative	MSS	ASIAN	NA	NA	NA	NA	NA	HongKong	NA
pfg124T	M	82	intestinal	III	poor	Antrum	negative	positive	MSS	ASIAN	NA	NA	NA	NA	NA	HongKong	NA
pfg125T	M	55	intestinal	III	poor	Cardia	negative	negative	MSS	ASIAN	NA	NA	NA	NA	NA	HongKong	NA
pfg127T	M	77	intestinal	III	moderate	Antrum	negative	positive	MSI	ASIAN	NA	NA	NA	NA	NA	HongKong	NA
pfg129T	M	68	intestinal	IV	poor	Cardia	negative	negative	MSI	ASIAN	NA	NA	NA	NA	NA	HongKong	NA
pfg130T	M	67	intestinal	III	moderate	Body	negative	positive	MSS	ASIAN	NA	NA	NA	NA	NA	HongKong	NA
pfg132T	M	45	intestinal	III	moderate	Cardia	negative	positive	MSS	ASIAN	NA	NA	NA	NA	NA	HongKong	NA
pfg135T	M	64	intestinal	IV	moderate	Cardia	negative	negative	MSS	ASIAN	NA	NA	NA	NA	NA	HongKong	NA
pfg136T	M	45	diffuse	IV	poor	Cardia	negative	negative	MSS	ASIAN	NA	NA	NA	NA	NA	HongKong	NA
pfg138T	F	32	diffuse	IV	poor	Body	negative	positive	MSS	ASIAN	NA	NA	NA	NA	NA	HongKong	NA
pfg142T	M	64	diffuse	IV	poor	Antrum	negative	positive	MSS	ASIAN	NA	NA	NA	NA	NA	HongKong	NA
pfg143T	F	79	intestinal	IV	moderate	Antrum	negative	positive	MSI	ASIAN	NA	NA	NA	NA	NA	HongKong	NA
pfg144T	M	77	intestinal	III	moderate	Body	negative	negative	MSS	ASIAN	NA	NA	NA	NA	NA	HongKong	NA
pfg145T	M	49	diffuse	II	poor	Body	negative	positive	MSS	ASIAN	NA	NA	NA	NA	NA	HongKong	NA
pfg146T	M	63	intestinal	III	moderate	Antrum	negative	positive	MSS	ASIAN	NA	NA	NA	NA	NA	HongKong	NA
pfg151T	F	41	diffuse	IV	poor	Body	negative	negative	MSS	ASIAN	NA	NA	NA	NA	NA	HongKong	NA
pfg156T	F	59	diffuse	IV	poor	Body	negative	negative	MSS	ASIAN	NA	NA	NA	NA	NA	HongKong	NA
pfg157T	M	76	mixed	III	poor	Body	negative	negative	MSS	ASIAN	NA	NA	NA	NA	NA	HongKong	NA
pfg160T	M	82	intestinal	I	poor	Antrum	negative	negative	MSS	ASIAN	NA	NA	NA	NA	NA	HongKong	NA
pfg164T	F	48	diffuse	III	poor	Antrum	negative	positive	MSS	ASIAN	NA	NA	NA	NA	NA	HongKong	NA
pfg166T	F	72	intestinal	IV	well	Cardia	negative	negative	MSS	ASIAN	NA	NA	NA	NA	NA	HongKong	NA
pfg167T	M	73	intestinal	IV	poor	Cardia	negative	positive	MSS	ASIAN	NA	NA	NA	NA	NA	HongKong	NA
pfg173T	M	61	intestinal	IV	moderate	Cardia	negative	positive	MSS	ASIAN	NA	NA	NA	NA	NA	HongKong	NA
pfg180T	M	75	diffuse	IV	poor	Antrum	negative	negative	MSS	ASIAN	NA	NA	NA	NA	NA	HongKong	NA
pfg181T	F	77	intestinal	IV	poor	Antrum	negative	negative	MSI	ASIAN	NA	NA	NA	NA	NA	HongKong	NA
pfg182T	F	39	diffuse	IV	poor	Antrum	negative	negative	MSS	ASIAN	NA	NA	NA	NA	NA	HongKong	NA
pfg205T	F	89	diffuse	IV	moderate	Antrum	negative	negative	MSS	ASIAN	NA	NA	NA	NA	NA	HongKong	NA
pfg212T	M	81	intestinal	I	moderate	Antrum	negative	negative	MSI	ASIAN	NA	NA	NA	NA	NA	HongKong	NA
pfg213T	F	79	diffuse	II	poor	Antrum	negative	positive	MSS	ASIAN	NA	NA	NA	NA	NA	HongKong	NA
pfg217T	M	85	intestinal	IV	poor	Cardia	negative	negative	MSS	ASIAN	NA	NA	NA	NA	NA	HongKong	NA
pfg220T	F	41	diffuse	II	poor	Antrum	negative	positive	MSS	ASIAN	NA	NA	NA	NA	NA	HongKong	NA
pfg222T	F	85	diffuse	IV	poor	Antrum	negative	negative	MSS	ASIAN	NA	NA	NA	NA	NA	HongKong	NA
pfg228T	F	58	diffuse	IV	poor	Body	negative	negative	MSS	ASIAN	NA	NA	NA	NA	NA	HongKong	NA
pfg258T	M	78	diffuse	I	poor	Cardia	negative	negative	MSS	ASIAN	NA	NA	NA	NA	NA	HongKong	NA
pfg272T	M	47	diffuse	III	poor	Antrum	negative	positive	MSS	ASIAN	NA	NA	NA	NA	NA	HongKong	NA
pfg277T	M	77	mixed	IV	poor	Cardia	negative	positive	MSS	ASIAN	NA	NA	NA	NA	NA	HongKong	NA
pfg282T	M	71	intestinal	NA	moderate	Antrum	negative	negative	MSS	ASIAN	NA	NA	NA	NA	NA	HongKong	NA
pfg311T	M	43	mixed	III	poor	Antrum	negative	negative	MSS	ASIAN	NA	NA	NA	NA	NA	HongKong	NA
pfg316T	M	56	diffuse	III	poor	Antrum	negative	positive	MSS	ASIAN	NA	NA	NA	NA	NA	HongKong	NA
pfg317T	F	43	diffuse	III	poor	Body	negative	negative	MSS	ASIAN	NA	NA	NA	NA	NA	HongKong	NA
pfg344T	M	78	diffuse	IV	poor	Antrum	negative	positive	MSS	ASIAN	NA	NA	NA	NA	NA	HongKong	NA
pfg373T	M	56	mixed	III	poor	Body	negative	negative	MSS	ASIAN	NA	NA	NA	NA	NA	HongKong	NA
pfg375T	F	45	diffuse	III	poor	Antrum	negative	negative	MSS	ASIAN	NA	NA	NA	NA	NA	HongKong	NA
pfg378T	M	48	mixed	I	moderate	Antrum	negative	positive	MSS	ASIAN	NA	NA	NA	NA	NA	HongKong	NA
pfg398T	F	44	diffuse	I	poor	Body	negative	positive	MSS	ASIAN	NA	NA	NA	NA	NA	HongKong	NA
pfg413T	M	65	intestinal	I	moderate	Body	negative	positive	MSS	ASIAN	NA	NA	NA	NA	NA	HongKong	NA
pfg416T	M	43	diffuse	III	poor	Body	negative	positive	MSS	ASIAN	NA	NA	NA	NA	NA	HongKong	NA
pfg424T	M	70	intestinal	IV	poor	Body	negative	positive	MSS	ASIAN	NA	NA	NA	NA	NA	HongKong	NA
T09	F	40	diffuse	III	NA	Cardia	negative	NA	NA	ASIAN	NA	NA	70.2	NA	NA	S.Korea	Yes
T04	F	46	diffuse	III	NA	Cardia	negative	NA	NA	ASIAN	NA	NA	31.3333	NA	NA	S.Korea	Yes
T44	M	50	diffuse	III	NA	Body	negative	NA	NA	ASIAN	NA	NA	45.6333	NA	NA	S.Korea	Yes
T49	F	50	diffuse	IV	NA	Body	negative	NA	NA	ASIAN	NA	NA	31.1	NA	NA	S.Korea	Yes
T10	M	51	diffuse	IV	poor	Body	negative	NA	NA	ASIAN	NA	NA	21.2333	NA	NA	S.Korea	Yes
T42	F	52	diffuse	III	NA	Body	negative	NA	NA	ASIAN	NA	NA	83.6	NA	NA	S.Korea	Yes
T36	F	56	diffuse	III	poor	Body	negative	NA	NA	ASIAN	NA	NA	12.9333	NA	NA	S.Korea	Yes
T08	M	58	diffuse	IV	poor	Others	negative	NA	NA	ASIAN	NA	NA	94.4333	NA	NA	S.Korea	Not
T63	M	60	diffuse	IV	poor	Body	positive	NA	NA	ASIAN	NA	NA	16.8333	NA	NA	S.Korea	Yes
T48	F	69	diffuse	III	NA	Antrum	negative	NA	NA	ASIAN	NA	NA	11.0667	NA	NA	S.Korea	Yes
T58	M	72	diffuse	III	NA	Antrum	negative	NA	NA	ASIAN	NA	NA	12.0667	NA	NA	S.Korea	Yes
T29	F	73	diffuse	III	poor	Body	negative	NA	NA	ASIAN	NA	NA	19.7	NA	NA	S.Korea	Yes
T57	M	74	diffuse	IV	NA	Others	negative	NA	NA	ASIAN	NA	NA	8.63333	NA	NA	S.Korea	Yes
T31	M	24	diffuse	IV	poor	Body	negative	NA	NA	ASIAN	NA	NA	27.8	NA	NA	S.Korea	Yes
T15	M	34	diffuse	III	poor	Antrum	negative	NA	NA	ASIAN	NA	NA	9.03333	NA	NA	S.Korea	Yes
T28	M	39	diffuse	IV	poor	Antrum	negative	NA	NA	ASIAN	NA	NA	10.8333	NA	NA	S.Korea	Yes
T17	M	52	diffuse	IV	NA	Antrum	negative	NA	NA	ASIAN	NA	NA	11.4667	NA	NA	S.Korea	Yes
T60	F	55	diffuse	IV	NA	Antrum	negative	NA	NA	ASIAN	NA	NA	36.1667	NA	NA	S.Korea	Yes
T26	M	58	diffuse	IV	poor	Body	positive	NA	NA	ASIAN	NA	NA	5.93333	NA	NA	S.Korea	Yes
T45	M	61	diffuse	III	NA	Body	negative	NA	NA	ASIAN	NA	NA	59.7	NA	NA	S.Korea	Not
T62	F	62	diffuse	III	poor	Cardia	negative	NA	NA	ASIAN	NA	NA	10.8333	NA	NA	S.Korea	Yes
T07	M	62	diffuse	III	poor	Body	positive	NA	NA	ASIAN	NA	NA	21.9667	NA	NA	S.Korea	Yes
T18	M	62	diffuse	III	poor	Antrum	negative	NA	NA	ASIAN	NA	NA	87.2667	NA	NA	S.Korea	Not
T06	M	63	diffuse	III	poor	Body	negative	NA	NA	ASIAN	NA	NA	11	NA	NA	S.Korea	Yes
T30	M	64	diffuse	III	poor	Antrum	negative	NA	NA	ASIAN	NA	NA	85.2333	NA	NA	S.Korea	Not
T38	F	65	diffuse	IV	NA	Body	negative	NA	NA	ASIAN	NA	NA	8.03333	NA	NA	S.Korea	Yes
T14	M	66	diffuse	IV	poor	Cardia	positive	NA	NA	ASIAN	NA	NA	53.0333	NA	NA	S.Korea	Yes
T19	F	67	diffuse	IV	poor	Cardia	negative	NA	NA	ASIAN	NA	NA	16.2333	NA	NA	S.Korea	Yes
T46	F	68	diffuse	III	poor	Antrum	negative	NA	NA	ASIAN	NA	NA	18.0667	NA	NA	S.Korea	Yes
T34	M	70	diffuse	IV	NA	Body	negative	NA	NA	ASIAN	NA	NA	8.33333	NA	NA	S.Korea	Yes
T20	M	72	diffuse	III	poor	Antrum	negative	NA	NA	ASIAN	NA	NA	86.8	NA	NA	S.Korea	Yes
T40	M	72	intestinal	III	NA	Antrum	negative	NA	NA	ASIAN	NA	NA	31.4667	NA	NA	S.Korea	Yes
T21	M	46	intestinal	IV	NA	Body	negative	NA	NA	ASIAN	NA	NA	86.7	NA	NA	S.Korea	Not
T27	M	51	intestinal	IV	NA	Antrum	negative	NA	NA	ASIAN	NA	NA	14.9667	NA	NA	S.Korea	Yes
T16	M	54	intestinal	IV	NA	Antrum	negative	NA	NA	ASIAN	NA	NA	17.4333	NA	NA	S.Korea	Yes
T50	M	55	intestinal	IV	NA	Antrum	negative	NA	NA	ASIAN	NA	NA	82	NA	NA	S.Korea	Yes
T23	M	59	intestinal	III	NA	Antrum	negative	NA	NA	ASIAN	NA	NA	21.2333	NA	NA	S.Korea	Yes
T25	F	60	intestinal	III	NA	Antrum	negative	NA	NA	ASIAN	NA	NA	85.9333	NA	NA	S.Korea	Not
T02	M	61	intestinal	III	NA	Antrum	negative	NA	NA	ASIAN	NA	NA	7.13333	NA	NA	S.Korea	Yes
T22	M	63	intestinal	III	NA	Antrum	negative	NA	NA	ASIAN	NA	NA	86.3667	NA	NA	S.Korea	Not
T112	M	65	intestinal	II	NA	Body	negative	NA	NA	ASIAN	NA	NA	23.6	NA	NA	S.Korea	Yes
T43	M	66	intestinal	III	NA	Antrum	negative	NA	NA	ASIAN	NA	NA	31.1333	NA	NA	S.Korea	Yes
T32	M	67	intestinal	III	NA	Antrum	negative	NA	NA	ASIAN	NA	NA	85.0333	NA	NA	S.Korea	Not
T13	M	69	intestinal	III	NA	Body	negative	NA	NA	ASIAN	NA	NA	38.3	NA	NA	S.Korea	Yes
T05	M	69	intestinal	III	NA	Others	negative	NA	NA	ASIAN	NA	NA	35.9333	NA	NA	S.Korea	Yes
T55	M	70	intestinal	III	NA	Body	negative	NA	NA	ASIAN	NA	NA	79.9333	NA	NA	S.Korea	Not
T12	M	70	intestinal	IV	NA	Body	negative	NA	NA	ASIAN	NA	NA	12.8	NA	NA	S.Korea	Yes
T56	M	72	intestinal	III	NA	Antrum	negative	NA	NA	ASIAN	NA	NA	23.4333	NA	NA	S.Korea	Yes
T47	M	72	intestinal	III	NA	Body	negative	NA	NA	ASIAN	NA	NA	47.7	NA	NA	S.Korea	Yes
GC299	M	NA	diffuse	I	NA	NA	NA	NA	NA	ASIAN	NA	NA	NA	NA	NA	Japan	NA
GC302	M	NA	diffuse	II	NA	NA	NA	NA	NA	ASIAN	NA	NA	NA	NA	NA	Japan	NA
GC307	M	NA	diffuse	I	NA	NA	NA	NA	NA	ASIAN	NA	NA	NA	NA	NA	Japan	NA
GC313	M	NA	diffuse	IV	NA	NA	NA	NA	NA	ASIAN	NA	NA	NA	NA	NA	Japan	NA
GC315	F	NA	diffuse	III	NA	NA	NA	NA	NA	ASIAN	NA	NA	NA	NA	NA	Japan	NA
GC332	F	NA	diffuse	III	NA	NA	NA	NA	NA	ASIAN	NA	NA	NA	NA	NA	Japan	NA
GC356	F	NA	diffuse	II	NA	NA	NA	NA	NA	ASIAN	NA	NA	NA	NA	NA	Japan	NA
GC342	M	NA	diffuse	III	NA	NA	NA	NA	NA	ASIAN	NA	NA	NA	NA	NA	Japan	NA
GC359	M	NA	diffuse	II	NA	NA	NA	NA	NA	ASIAN	NA	NA	NA	NA	NA	Japan	NA
GC383	M	NA	diffuse	III	NA	NA	NA	NA	NA	ASIAN	NA	NA	NA	NA	NA	Japan	NA
GC314	NA	NA	diffuse	NA	NA	NA	NA	NA	NA	ASIAN	NA	NA	NA	NA	NA	Japan	NA
GC337	NA	NA	diffuse	NA	NA	NA	NA	NA	NA	ASIAN	NA	NA	NA	NA	NA	Japan	NA
GC350	NA	NA	diffuse	NA	NA	NA	NA	NA	NA	ASIAN	NA	NA	NA	NA	NA	Japan	NA
GC296	NA	NA	diffuse	NA	NA	NA	NA	NA	NA	ASIAN	NA	NA	NA	NA	NA	Japan	NA
GC319	NA	NA	diffuse	NA	NA	NA	NA	NA	NA	ASIAN	NA	NA	NA	NA	NA	Japan	NA
GC343	NA	NA	diffuse	NA	NA	NA	NA	NA	NA	ASIAN	NA	NA	NA	NA	NA	Japan	NA
GC289	NA	NA	diffuse	NA	NA	NA	NA	NA	NA	ASIAN	NA	NA	NA	NA	NA	Japan	NA
GC325	NA	NA	diffuse	NA	NA	NA	NA	NA	NA	ASIAN	NA	NA	NA	NA	NA	Japan	NA
GC364	NA	NA	diffuse	NA	NA	NA	NA	NA	NA	ASIAN	NA	NA	NA	NA	NA	Japan	NA
GC297	NA	NA	diffuse	NA	NA	NA	NA	NA	NA	ASIAN	NA	NA	NA	NA	NA	Japan	NA
GC304	NA	NA	diffuse	NA	NA	NA	NA	NA	NA	ASIAN	NA	NA	NA	NA	NA	Japan	NA
GC340	NA	NA	diffuse	NA	NA	NA	NA	NA	NA	ASIAN	NA	NA	NA	NA	NA	Japan	NA
GC370	NA	NA	diffuse	NA	NA	NA	NA	NA	NA	ASIAN	NA	NA	NA	NA	NA	Japan	NA
GC353	NA	NA	diffuse	NA	NA	NA	NA	NA	NA	ASIAN	NA	NA	NA	NA	NA	Japan	NA
GC306	NA	NA	diffuse	NA	NA	NA	NA	NA	NA	ASIAN	NA	NA	NA	NA	NA	Japan	NA
GC310	NA	NA	diffuse	NA	NA	NA	NA	NA	NA	ASIAN	NA	NA	NA	NA	NA	Japan	NA
GC312	NA	NA	diffuse	NA	NA	NA	NA	NA	NA	ASIAN	NA	NA	NA	NA	NA	Japan	NA
GC351	NA	NA	diffuse	NA	NA	NA	NA	NA	NA	ASIAN	NA	NA	NA	NA	NA	Japan	NA
GC357	NA	NA	diffuse	NA	NA	NA	NA	NA	NA	ASIAN	NA	NA	NA	NA	NA	Japan	NA
GC361	NA	NA	diffuse	NA	NA	NA	NA	NA	NA	ASIAN	NA	NA	NA	NA	NA	Japan	NA
GC001T	M	69	intestinal	III	NA	Others	N	N	MSS	ASIAN	NA	death	48	NA	NA	BeiJing	NA
GC003T	M	81	intestinal	II	NA	NA	N	N	MSI-L	ASIAN	NA	live	18	NA	NA	BeiJing	NA
GC004T	M	61	intestinal	II	NA	NA	N	N	MSS	ASIAN	NA	live	28	NA	NA	BeiJing	NA
GC008T	M	65	diffuse	IV	NA	Antrum	N	N	MSS	ASIAN	NA	live	NA	NA	NA	BeiJing	NA
GC011T	M	70	diffuse	III	NA	NA	N	N	MSS	ASIAN	NA	live	40	NA	NA	BeiJing	NA
GC014T	F	56	diffuse	III	NA	NA	N	N	MSI-L	ASIAN	NA	death	19	NA	NA	BeiJing	NA
GC016T	M	36	diffuse	II	NA	NA	Y	N	MSS	ASIAN	NA	death	9	NA	NA	BeiJing	NA
GC018T	M	59	diffuse	III	NA	NA	Y	N	MSS	ASIAN	NA	live	52	NA	NA	BeiJing	NA
GC020T	F	59	intestinal	IV	NA	NA	Y	N	MSS	ASIAN	NA	death	8	NA	NA	BeiJing	NA
GC021T	M	55	intestinal	II	NA	NA	Y	N	MSI-L	ASIAN	NA	live	38	NA	NA	BeiJing	NA
GC022T	M	58	intestinal	II	NA	NA	Y	N	MSS	ASIAN	NA	live	23	NA	NA	BeiJing	NA
GC023T	M	66	intestinal	III	NA	NA	Y	N	MSS	ASIAN	NA	death	9	NA	NA	BeiJing	NA
GC025T	M	71	intestinal	III	NA	NA	N	Y	MSS	ASIAN	NA	death	21	NA	NA	BeiJing	NA
GC027T	F	57	diffuse	III	NA	NA	Y	N	MSI-L	ASIAN	NA	death	55	NA	NA	BeiJing	NA
GC031T	M	74	intestinal	III	NA	NA	Y	N	MSI-L	ASIAN	NA	live	32	NA	NA	BeiJing	NA
GC032T	M	73	intestinal	II	NA	NA	Y	N	MSS	ASIAN	NA	live	55	NA	NA	BeiJing	NA
GC034T	M	79	intestinal	I	NA	NA	Y	N	MSI-H	ASIAN	NA	live	56	NA	NA	BeiJing	NA
GC036T	M	66	intestinal	I	NA	Antrum	N	N	MSS	ASIAN	NA	live	37	NA	NA	BeiJing	NA
GC037T	M	73	intestinal	II	NA	NA	N	N	MSS	ASIAN	NA	death	10	NA	NA	BeiJing	NA
GC040T	F	60	diffuse	III	NA	Body	N	N	MSS	ASIAN	NA	live	33	NA	NA	BeiJing	NA
GC043T	M	58	diffuse	IV	NA	Body	N	N	MSS	ASIAN	NA	death	11	NA	NA	BeiJing	NA
GC044T	M	44	diffuse	III	NA	Antrum	N	N	MSS	ASIAN	NA	live	32	NA	NA	BeiJing	NA
GC047T	F	46	intestinal	III	NA	Body	N	N	MSS	ASIAN	NA	live	31	NA	NA	BeiJing	NA
GC048T	M	50	diffuse	I	NA	Antrum	N	N	MSS	ASIAN	NA	live	26	NA	NA	BeiJing	NA
GC049T	M	66	diffuse	III	NA	NA	N	N	MSS	ASIAN	NA	death	25	NA	NA	BeiJing	NA
GC050T	M	62	diffuse	I	NA	Body	N	N	MSS	ASIAN	NA	live	25	NA	NA	BeiJing	NA
GC051T	M	51	intestinal	I	NA	Antrum	N	Y	MSS	ASIAN	NA	live	24	NA	NA	BeiJing	NA
GC052T	M	45	intestinal	III	NA	Antrum	N	N	MSS	ASIAN	NA	live	25	NA	NA	BeiJing	NA
GC054T	M	52	diffuse	I	NA	Others	N	N	MSS	ASIAN	NA	live	25	NA	NA	BeiJing	NA
GC055T	F	35	diffuse	IV	NA	Body	N	N	MSS	ASIAN	NA	death	5	NA	NA	BeiJing	NA
GC056T	F	52	diffuse	III	NA	NA	N	Y	MSS	ASIAN	NA	live	20	NA	NA	BeiJing	NA
GC058T	M	64	intestinal	III	NA	NA	N	N	MSS	ASIAN	NA	live	20	NA	NA	BeiJing	NA
GC059T	M	55	intestinal	III	NA	Body	N	N	MSS	ASIAN	NA	live	19	NA	NA	BeiJing	NA
GC060T	F	69	diffuse	III	NA	NA	N	N	MSS	ASIAN	NA	death	2	NA	NA	BeiJing	NA
GC062T	M	58	diffuse	III	NA	Body	N	N	MSS	ASIAN	NA	live	18	NA	NA	BeiJing	NA
GC064T	F	31	diffuse	IV	NA	Body	N	N	MSS	ASIAN	NA	death	4	NA	NA	BeiJing	NA
GC065T	M	54	diffuse	III	NA	Body	N	N	MSS	ASIAN	NA	live	13	NA	NA	BeiJing	NA
GC066T	M	61	diffuse	III	NA	NA	N	N	MSS	ASIAN	NA	death	6	NA	NA	BeiJing	NA
GC067T	F	49	diffuse	III	NA	Body	N	N	MSS	ASIAN	NA	live	12	NA	NA	BeiJing	NA
GC068T	F	72	diffuse	III	NA	NA	N	N	MSS	ASIAN	NA	live	12	NA	NA	BeiJing	NA
GC069T	M	61	diffuse	III	NA	Body	N	N	MSS	ASIAN	NA	death	7	NA	NA	BeiJing	NA
GC070T	M	65	diffuse	IV	NA	Body	N	N	MSS	ASIAN	NA	death	8	NA	NA	BeiJing	NA
GC072T	M	52	diffuse	III	NA	Antrum	N	Y	MSS	ASIAN	NA	death	3	NA	NA	BeiJing	NA
GC073T	F	63	intestinal	III	NA	Antrum	N	N	MSS	ASIAN	NA	live	6	NA	NA	BeiJing	NA
GC075T	M	66	diffuse	IV	NA	Body	N	N	MSS	ASIAN	NA	live	6	NA	NA	BeiJing	NA
GC077T	M	66	diffuse	I	NA	Others	N	N	MSS	ASIAN	NA	live	6	NA	NA	BeiJing	NA
GC078T	M	67	intestinal	IV	NA	Body	N	N	MSS	ASIAN	NA	live	6	NA	NA	BeiJing	NA
GC079T	M	67	diffuse	III	NA	Body	Y	N	MSS	ASIAN	NA	live	6	NA	NA	BeiJing	NA
GC080T	M	58	diffuse	III	NA	Cardia	N	N	MSS	ASIAN	NA	live	6	NA	NA	BeiJing	NA
GC081T	M	55	intestinal	I	NA	Antrum	Y	N	MSS	ASIAN	NA	live	6	NA	NA	BeiJing	NA
GC082T	M	69	intestinal	III	NA	Antrum	Y	N	MSS	ASIAN	NA	live	6	NA	NA	BeiJing	NA
GC083T	M	63	intestinal	III	NA	Body	N	N	MSS	ASIAN	NA	live	6	NA	NA	BeiJing	NA
GC084T	M	65	intestinal	IV	NA	Body	Y	N	MSS	ASIAN	NA	live	6	NA	NA	BeiJing	NA
GC085T	M	71	diffuse	II	NA	Cardia	Y	N	MSS	ASIAN	NA	live	6	NA	NA	BeiJing	NA
GC086T	F	47	intestinal	III	NA	Cardia	N	N	MSS	ASIAN	NA	live	6	NA	NA	BeiJing	NA
GC087T	F	46	intestinal	III	NA	Antrum	N	N	MSS	ASIAN	NA	live	6	NA	NA	BeiJing	NA
GC089T	F	80	diffuse	I	NA	NA	N	N	MSI-L	ASIAN	NA	live	43	NA	NA	BeiJing	NA
GC090T	M	59	diffuse	III	NA	Antrum	N	N	MSS	ASIAN	NA	live	21	NA	NA	BeiJing	NA
GC091T	M	64	diffuse	III	NA	Antrum	N	N	MSS	ASIAN	NA	death	3	NA	NA	BeiJing	NA
GC092T	F	69	intestinal	II	NA	Antrum	N	N	MSS	ASIAN	NA	live	70	NA	NA	BeiJing	NA
GC093T	M	60	diffuse	III	NA	Body	N	N	MSS	ASIAN	NA	death	9	NA	NA	BeiJing	NA
GC094T	F	58	diffuse	I	NA	Body	N	N	MSS	ASIAN	NA	live	66	NA	NA	BeiJing	NA
GC095T	M	53	intestinal	III	NA	Antrum	N	N	MSS	ASIAN	NA	live	66	NA	NA	BeiJing	NA
GC098T	M	88	intestinal	IV	NA	Antrum	N	N	MSS	ASIAN	NA	death	6	NA	NA	BeiJing	NA
GC099T	F	67	diffuse	IV	NA	Body	N	N	MSS	ASIAN	NA	death	3	NA	NA	BeiJing	NA
GC100T	M	52	intestinal	II	NA	Body	Y	N	MSS	ASIAN	NA	live	66	NA	NA	BeiJing	NA
GC101T	M	63	intestinal	IV	NA	Cardia	N	N	MSS	ASIAN	NA	death	12	NA	NA	BeiJing	NA
GC102T	M	50	intestinal	III	NA	Antrum	N	N	MSS	ASIAN	NA	live	62	NA	NA	BeiJing	NA
GC103T	M	46	diffuse	III	NA	Body	N	N	MSS	ASIAN	NA	death	8	NA	NA	BeiJing	NA
GC104T	M	50	diffuse	II	NA	Antrum	Y	N	MSS	ASIAN	NA	live	67	NA	NA	BeiJing	NA
GC105T	M	61	diffuse	III	NA	Antrum	Y	N	MSS	ASIAN	NA	death	4	NA	NA	BeiJing	NA
GC106T	M	65	intestinal	III	NA	Antrum	N	N	MSS	ASIAN	NA	death	9	NA	NA	BeiJing	NA
GC107T	M	59	diffuse	III	NA	Body	N	N	MSS	ASIAN	NA	death	10	NA	NA	BeiJing	NA
GC108T	F	64	intestinal	I	NA	Antrum	N	N	MSS	ASIAN	NA	live	25	NA	NA	BeiJing	NA
GC110T	F	76	intestinal	III	NA	Antrum	N	N	MSS	ASIAN	NA	death	8	NA	NA	BeiJing	NA
GC112T	M	65	intestinal	II	NA	Cardia	N	N	MSS	ASIAN	NA	live	55	NA	NA	BeiJing	NA
GC113T	F	64	intestinal	III	NA	Antrum	N	N	MSS	ASIAN	NA	live	55	NA	NA	BeiJing	NA
GC114T	M	66	diffuse	III	NA	Cardia	N	N	MSS	ASIAN	NA	death	34	NA	NA	BeiJing	NA
GC116T	F	34	diffuse	I	NA	Body	N	N	MSS	ASIAN	NA	live	7	NA	NA	BeiJing	NA
GC117T	M	55	intestinal	III	NA	Antrum	Y	N	MSI-H	ASIAN	NA	live	52	NA	NA	BeiJing	NA
GC119T	M	73	diffuse	II	NA	Antrum	N	N	MSS	ASIAN	NA	death	30	NA	NA	BeiJing	NA
GC120T	F	71	diffuse	III	NA	Antrum	N	N	MSS	ASIAN	NA	death	30	NA	NA	BeiJing	NA
GC121T	M	57	diffuse	III	NA	Antrum	N	N	MSS	ASIAN	NA	death	26	NA	NA	BeiJing	NA
GC122T	F	51	intestinal	III	NA	Antrum	N	N	MSS	ASIAN	NA	live	50	NA	NA	BeiJing	NA
GC123T	M	76	diffuse	III	NA	Cardia	N	N	MSS	ASIAN	NA	death	6	NA	NA	BeiJing	NA
GC124T	M	66	diffuse	III	NA	Body	N	N	MSS	ASIAN	NA	death	28	NA	NA	BeiJing	NA
GC125T	F	75	diffuse	III	NA	Antrum	N	N	MSS	ASIAN	NA	live	45	NA	NA	BeiJing	NA
GC126T	M	55	intestinal	I	NA	Cardia	N	N	MSS	ASIAN	NA	live	45	NA	NA	BeiJing	NA
GC128T	M	80	intestinal	II	NA	Body	N	N	MSS	ASIAN	NA	live	40	NA	NA	BeiJing	NA
GC129T	F	46	diffuse	III	NA	Antrum	N	N	MSS	ASIAN	NA	death	19	NA	NA	BeiJing	NA
GC130T	M	70	diffuse	IV	NA	Antrum	N	N	MSS	ASIAN	NA	death	10	NA	NA	BeiJing	NA
GC131T	M	62	intestinal	III	NA	Body	N	N	MSS	ASIAN	NA	live	37	NA	NA	BeiJing	NA
GC132T	M	53	diffuse	IV	NA	Antrum	N	N	MSS	ASIAN	NA	death	6	NA	NA	BeiJing	NA
GC133T	M	60	intestinal	II	NA	Antrum	N	N	MSS	ASIAN	NA	live	40	NA	NA	BeiJing	NA
GC134T	F	57	diffuse	III	NA	Body	N	N	MSS	ASIAN	NA	death	20	NA	NA	BeiJing	NA
GC135T	M	70	diffuse	III	NA	Antrum	N	N	MSS	ASIAN	NA	live	40	NA	NA	BeiJing	NA
GC136T	F	53	diffuse	III	NA	Antrum	N	N	MSS	ASIAN	NA	live	40	NA	NA	BeiJing	NA
GC137T	M	69	intestinal	III	NA	Antrum	N	N	MSS	ASIAN	NA	live	40	NA	NA	BeiJing	NA
GC140T	M	46	intestinal	III	NA	Cardia	N	Y	MSS	ASIAN	NA	live	40	NA	NA	BeiJing	NA
GC141T	M	73	intestinal	IV	NA	Cardia	N	N	MSS	ASIAN	NA	death	12	NA	NA	BeiJing	NA
GC142T	F	75	intestinal	III	NA	Antrum	Y	N	MSS	ASIAN	NA	live	43	NA	NA	BeiJing	NA
GC143T	F	58	intestinal	II	NA	Antrum	N	N	MSS	ASIAN	NA	live	72	NA	NA	BeiJing	NA
GC144T	M	47	intestinal	III	NA	Cardia	N	N	MSS	ASIAN	NA	death	16	NA	NA	BeiJing	NA
GC145T	M	52	intestinal	II	NA	Antrum	N	N	MSS	ASIAN	NA	live	83	NA	NA	BeiJing	NA
GC146T	F	71	intestinal	III	NA	Antrum	N	N	MSS	ASIAN	NA	live	63	NA	NA	BeiJing	NA
GC147T	M	50	intestinal	III	NA	Antrum	N	N	MSS	ASIAN	NA	live	74	NA	NA	BeiJing	NA
GC148T	F	80	intestinal	II	NA	Antrum	N	N	MSS	ASIAN	NA	live	74	NA	NA	BeiJing	NA
GC149T	F	60	intestinal	III	NA	Antrum	N	N	MSS	ASIAN	NA	live	62	NA	NA	BeiJing	NA
GC150T	M	65	intestinal	III	NA	Antrum	N	N	MSS	ASIAN	NA	death	37	NA	NA	BeiJing	NA
GC151T	M	45	intestinal	III	NA	Antrum	N	N	MSS	ASIAN	NA	death	38	NA	NA	BeiJing	NA
GC152T	F	47	diffuse	III	NA	Others	N	N	MSS	ASIAN	NA	death	9	NA	NA	BeiJing	NA
GC153T	F	59	diffuse	III	NA	Cardia	N	Y	MSS	ASIAN	NA	death	13	NA	NA	BeiJing	NA
GC154T	F	79	diffuse	NA	NA	Antrum	N	N	MSI-H	ASIAN	NA	live	77	NA	NA	BeiJing	NA
GC157T	F	62	intestinal	III	NA	Antrum	N	N	MSI-H	ASIAN	NA	live	84	NA	NA	BeiJing	NA
GC158T	M	47	diffuse	III	NA	Antrum	N	N	MSS	ASIAN	NA	live	NA	NA	NA	BeiJing	NA
GC159T	F	55	intestinal	II	NA	NA	N	Y	MSS	ASIAN	NA	live	84	NA	NA	BeiJing	NA
GC160T	M	75	intestinal	IV	NA	Cardia	N	Y	MSS	ASIAN	NA	death	12	NA	NA	BeiJing	NA
GC161T	M	48	intestinal	NA	NA	Antrum	N	N	MSS	ASIAN	NA	death	10	NA	NA	BeiJing	NA
GC163T	M	48	diffuse	III	NA	Antrum	N	N	MSS	ASIAN	NA	live	81	NA	NA	BeiJing	NA
GC164T	F	64	intestinal	III	NA	Body	N	N	MSS	ASIAN	NA	death	2	NA	NA	BeiJing	NA
GC167T	M	49	diffuse	II	NA	Antrum	N	N	MSS	ASIAN	NA	live	74	NA	NA	BeiJing	NA
GC168T	M	81	diffuse	II	NA	Body	N	Y	MSS	ASIAN	NA	death	16	NA	NA	BeiJing	NA
GC169T	M	58	diffuse	III	NA	Cardia	N	N	MSS	ASIAN	NA	death	53	NA	NA	BeiJing	NA
GC170T	M	61	diffuse	III	NA	Others	N	N	MSS	ASIAN	NA	death	NA	NA	NA	BeiJing	NA
GC171T	M	37	intestinal	III	NA	Antrum	NA	NA	MSI	ASIAN	NA	live	109	NA	NA	BeiJing	NA
GC172T	F	47	intestinal	III	NA	Antrum	NA	NA	MSS	ASIAN	NA	death	39	NA	NA	BeiJing	NA
GC173T	M	69	diffuse	III	NA	NA	NA	NA	MSS	ASIAN	NA	live	48	NA	NA	BeiJing	NA
GC174T	M	64	diffuse	II	NA	Body	NA	NA	MSS	ASIAN	NA	death	21	NA	NA	BeiJing	NA
GC175T	M	62	intestinal	III	NA	Cardia	N	Y	MSS	ASIAN	NA	live	12	NA	NA	BeiJing	NA
GC176T	F	67	intestinal	I	NA	Cardia	N	N	MSS	ASIAN	NA	live	13	NA	NA	BeiJing	NA
GC177T	F	68	intestinal	IV	NA	Cardia	N	NA	MSS	ASIAN	NA	death	26	NA	NA	BeiJing	NA
GC178T	M	49	diffuse	IV	NA	Cardia	N	N	MSS	ASIAN	NA	death	12	NA	NA	BeiJing	NA
GC179T	F	65	intestinal	III	NA	Cardia	N	N	MSS	ASIAN	NA	death	8	NA	NA	BeiJing	NA
GC180T	M	64	intestinal	III	NA	Cardia	N	N	MSS	ASIAN	NA	live	97	NA	NA	BeiJing	NA
GC181T	M	74	intestinal	III	NA	Cardia	N	N	MSS	ASIAN	NA	live	72	NA	NA	BeiJing	NA
GC182T	M	69	diffuse	II	NA	Cardia	N	N	MSS	ASIAN	NA	death	32	NA	NA	BeiJing	NA
GC183T	F	57	intestinal	IV	NA	Cardia	N	Y	MSS	ASIAN	NA	death	7	NA	NA	BeiJing	NA
GC184T	M	71	diffuse	I	NA	Antrum	N	N	MSS	ASIAN	NA	live	62	NA	NA	BeiJing	NA
GC185T	F	57	intestinal	IV	NA	Cardia	N	N	MSS	ASIAN	NA	death	53	NA	NA	BeiJing	NA
GC186T	M	48	diffuse	IV	NA	Antrum	N	NA	MSS	ASIAN	NA	death	3	NA	NA	BeiJing	NA
GC187T	M	60	diffuse	II	NA	Antrum	Y	Y	MSS	ASIAN	NA	death	44	NA	NA	BeiJing	NA
GC188T	M	53	diffuse	IV	NA	Antrum	N	N	MSS	ASIAN	NA	death	19	NA	NA	BeiJing	NA
GC189T	M	63	diffuse	III	NA	Antrum	N	Y	MSS	ASIAN	NA	death	10	NA	NA	BeiJing	NA
GC190T	M	39	diffuse	II	NA	Antrum	N	NA	MSS	ASIAN	NA	live	48	NA	NA	BeiJing	NA
GC191T	M	62	diffuse	IV	NA	Cardia	NA	N	MSS	ASIAN	NA	live	81	NA	NA	BeiJing	NA
GC192T	M	88	diffuse	III	NA	Cardia	Y	NA	MSS	ASIAN	NA	live	30	NA	NA	BeiJing	NA
GC193T	M	75	diffuse	II	NA	Antrum	N	N	MSS	ASIAN	NA	live	109	NA	NA	BeiJing	NA
GC194T	M	62	intestinal	III	NA	Antrum	Y	NA	MSS	ASIAN	NA	live	44	NA	NA	BeiJing	NA
GC195T	M	78	intestinal	IV	NA	Antrum	Y	NA	MSS	ASIAN	NA	death	3	NA	NA	BeiJing	NA
GC196T	F	55	diffuse	I	NA	Antrum	N	Y	MSI	ASIAN	NA	live	28	NA	NA	BeiJing	NA
GC197T	M	59	intestinal	IV	NA	Antrum	Y	N	MSS	ASIAN	NA	death	7	NA	NA	BeiJing	NA
GC198T	M	78	intestinal	II	NA	Antrum	Y	N	MSS	ASIAN	NA	live	90	NA	NA	BeiJing	NA
GC199T	M	68	intestinal	II	NA	Antrum	Y	N	MSS	ASIAN	NA	live	56	NA	NA	BeiJing	NA
GC200T	M	66	intestinal	IV	NA	Antrum	Y	N	MSS	ASIAN	NA	death	10	NA	NA	BeiJing	NA
GC201T	F	70	intestinal	IV	NA	Antrum	Y	N	MSI	ASIAN	NA	live	9	NA	NA	BeiJing	NA
GC202T	M	63	intestinal	III	NA	Antrum	Y	N	MSS	ASIAN	NA	death	20	NA	NA	BeiJing	NA
GC203T	M	79	intestinal	IV	NA	Antrum	Y	N	MSS	ASIAN	NA	death	17	NA	NA	BeiJing	NA
GC204T	M	70	intestinal	IV	NA	Antrum	Y	N	MSS	ASIAN	NA	live	40	NA	NA	BeiJing	NA
GC205T	M	46	intestinal	IV	NA	Antrum	N	NA	MSS	ASIAN	NA	live	34	NA	NA	BeiJing	NA
GC206T	M	70	intestinal	III	NA	Antrum	N	N	MSS	ASIAN	NA	death	26	NA	NA	BeiJing	NA
GC207T	M	64	intestinal	I	NA	Antrum	Y	N	MSS	ASIAN	NA	death	15	NA	NA	BeiJing	NA
GC208T	M	75	intestinal	IV	NA	Cardia	Y	NA	MSS	ASIAN	NA	death	58	NA	NA	BeiJing	NA
GC209T	M	68	intestinal	III	NA	Cardia	N	N	MSS	ASIAN	NA	death	20	NA	NA	BeiJing	NA
GC210T	M	59	intestinal	IV	NA	Cardia	N	N	MSS	ASIAN	NA	live	34	NA	NA	BeiJing	NA
GC211T	M	62	intestinal	III	NA	Antrum	NA	N	MSS	ASIAN	NA	death	84	NA	NA	BeiJing	NA
GC212T	M	65	intestinal	II	NA	Cardia	N	N	MSS	ASIAN	NA	live	16	NA	NA	BeiJing	NA
GC213T	M	78	intestinal	IV	NA	Cardia	N	NA	MSS	ASIAN	NA	death	4	NA	NA	BeiJing	NA
GC214T	M	66	intestinal	IV	NA	Cardia	N	NA	MSS	ASIAN	NA	live	17	NA	NA	BeiJing	NA
