# Supplementary figures and images for: A Comprehensive Survey of Genomic Alterations in Gastric Cancer Reveals Recurrent Neoantigens as Potential Therapeutic Targets
Source: Hindawi journal article supplement (doi:10.1155/2019/2183510), 2019-11-05

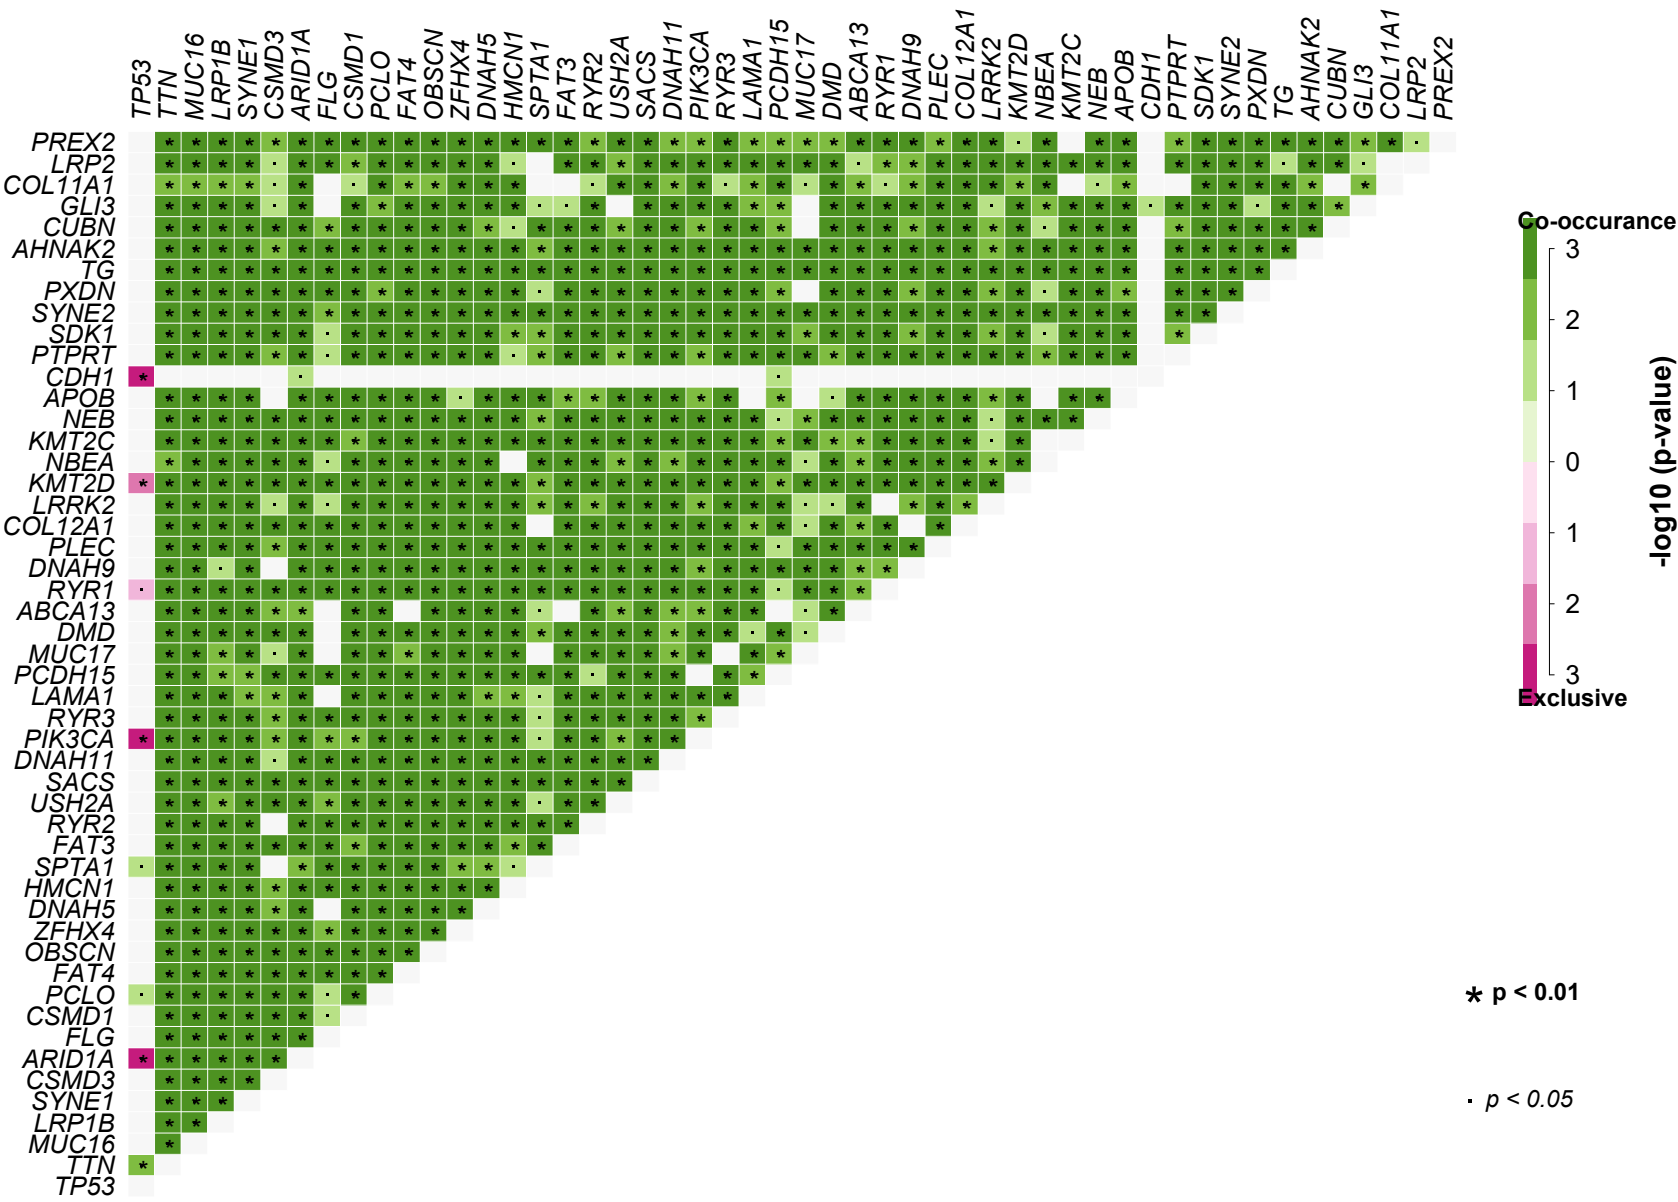

Supplement: f1 [file 2183510.f1.zip]
